# The speed of vaccination rollout and the risk of pathogen adaptation

Sylvain Gandon<sup>1,\*</sup>, Amaury Lambert<sup>2,3</sup>, Marina Voinson<sup>1</sup>, Troy Day<sup>4,5</sup>, and Todd L. Parsons<sup>6</sup>

<sup>1</sup>CEFE, CNRS, Univ Montpellier, EPHE, IRD, Montpellier, France

\*Corresponding author

<sup>2</sup>Institut de Biologie de l'ENS (IBENS), École Normale Supérieure (ENS), CNRS UMR 8197, Paris, France

<sup>3</sup>Center for Interdisciplinary Research in Biology (CIRB), Collège de France, CNRS UMR 7241, INSERM U1050, PSL Research University, Paris, France

<sup>4</sup>Department of Mathematics and Statistics, Queen's University, Kingston, Canada

<sup>5</sup>Department of Biology, Queen's University, Kingston, Canada

<sup>6</sup>Laboratoire de Probabilités, Statistique et Modélisation (LPSM), Sorbonne Université, CNRS UMR 8001, Paris, France

Tuesday 12<sup>th</sup> March, 2024

E-mails: SG - [sylvain.gandon@cefe.cnrs.fr](mailto:sylvain.gandon@cefe.cnrs.fr); AL - [amaury.lambert@ens.fr](mailto:amaury.lambert@ens.fr); MV - [marina.voinson@hotmail.com](mailto:marina.voinson@hotmail.com);  
TD - [tday@mast.queensu.ca](mailto:tday@mast.queensu.ca); TLP - [todd.parsons@upmc.fr](mailto:todd.parsons@upmc.fr);

Keywords: evolutionary epidemiology, vaccination, life-history evolution, demographic stochasticity, virulence, adaptive dynamics

## Abstract

Vaccination is expected to reduce disease prevalence and to halt the spread of epidemics. But pathogen adaptation may erode the efficacy of vaccination and challenge our ability to control disease spread. Here we examine the influence of the speed of vaccination rollout on the overall risk of pathogen adaptation to vaccination. We extend the framework of evolutionary epidemiology theory to account for the different steps leading to adaptation to vaccines: (1) introduction of a vaccine-escape variant by mutation from an endemic wild-type pathogen, (2) invasion of this vaccine-escape variant in spite of the risk of early extinction, (3) spread and, eventually, fixation of the vaccine-escape variant in the pathogen population. We show that the risk of pathogen adaptation is maximal for intermediate speed of vaccination rollout. On the one hand, slower rollout decreases pathogen adaptation because selection is too weak to avoid early extinction of the new variant. On the other hand, faster rollout decreases pathogen adaptation because it reduces the influx of adaptive mutations. Hence, vaccinating faster is recommended to decrease both the number of cases and the likelihood of pathogen adaptation. We also show that pathogen adaptation is driven by its basic reproduction ratio, the efficacy of the vaccine and the effects of the vaccine-escape mutations on pathogen life-history traits. Accounting for the interplay between epidemiology, selection and genetic drift, our work clarifies the influence of vaccination policies on different steps of pathogen adaptation and allows us to anticipate the effects of public-health interventions on pathogen evolution.

**Significance statement:** Pathogen adaptation to host immunity challenges the efficacy of vaccination against infectious diseases. Are there vaccination strategies that limit the emergence and the spread of vaccine-escape variants? Our theoretical model clarifies the interplay between the timing of vaccine escape mutation events and the transient epidemiological dynamics following the start of a vaccination campaign on pathogen adaptation. We show that the risk of adaptation is maximized for intermediate vaccination coverage but can be reduced by a combination of non pharmaceutical interventions and faster vaccination rollout.

## 21 1 Introduction

22 Vaccination offers unique opportunities to protect a large fraction of the host population and  
23 thus to control spreading epidemics. In principle, large vaccination coverage can lead to pathogen  
24 eradication. In practice, however, the coverage required for eradication is often impossible to  
25 reach with imperfect vaccines [16, 34]. Moreover, pathogen adaptation may erode the efficacy of  
26 vaccination. Even if adaptation to vaccines is less common than adaptation to drugs [14, 26, 27]  
27 the spread of vaccine-escape mutations may challenge our ability to halt the spread of epidemics.

28 Understanding the dynamics of pathogen adaptation to vaccines is particularly relevant in the  
29 control of the ongoing SARS-CoV-2 pandemic. Yet, most theoretical studies that explore the  
30 evolution of pathogens after vaccination are based on the analysis of deterministic models and  
31 ignore the potential effects induced by the stochasticity of epidemiological dynamics. Demographic  
32 stochasticity, however, drives the intensity of genetic drift and can affect the establishment of new  
33 mutations and the long-term evolution of pathogens [42, 44, 41]. Several studies showed how the  
34 demographic stochasticity induced by finite host and pathogen population sizes alters selection on  
35 the life-history traits of pathogens [29, 22, 36]. These analytical predictions rely on the assumption  
36 that mutation rate is low, which allows us to decouple epidemiological and evolutionary time  
37 scales. Indeed, when the influx of new mutations is low, the new strain is always introduced after  
38 the resident pathogen population has reached its endemic equilibrium. Many pathogens, however,  
39 have relatively large mutation rates [43] and the fate of a pathogen mutant introduced away from  
40 the endemic equilibrium is likely to be affected by the dynamics of the pathogen populations.  
41 Besides, the start of a vaccination campaign is expected to yield massive perturbations of the  
42 epidemiological dynamics and new mutations are likely to appear when the pathogen population  
43 is far from its endemic equilibrium.

44 The aim of the present study is to develop a versatile theoretical framework to evaluate the  
45 consequences of vaccination on the risk of pathogen adaptation to vaccination. There are six  
46 main evolutionary epidemiology outcomes after the start of vaccination which are summarized in  
47 **Figure 1**. Some of these outcomes are more favorable than others because they do not lead to  
48 the invasion of a new variant (**Figure 1a-c**). In contrast, vaccination may lead to the invasion of

49 vaccine-escape variants (**Figure 1e-f**). In the following we use a combination of deterministic and  
50 branching process approximations to study the joint epidemiological and evolutionary dynamics  
51 of the pathogen population. This analysis reveals the importance of the speed of the vaccination  
52 rollout as well as of the life-history characteristics of the vaccine-escape variants on the probability  
53 of pathogen adaptation.

## 54 2 Model

55 We use a classical SIR epidemiological model with demography, where hosts can either be suscepti-  
56 ble, infected or recovered [3]. The discrete number of each of these types of hosts is denoted by  $S^n$ ,  
57  $I^n$  and  $R^n$ , respectively. Because we are interested in the effect of demographic stochasticity the  
58 model is derived from a microscopic description of all the events that may occur in a finite—but not  
59 fixed—host population of (varying) total size  $N^n = S^n + I^n + R^n$ . We consider a continuous-time  
60 Markov process tracking the number of individuals of each type of host (see SI Section 1 for a  
61 detailed description). The susceptible hosts immigrate at rate  $\lambda n$ , where  $n$  is a “system size”, or  
62 scaling parameter, that indicates the order of magnitude of the arena in which the epidemic occurs.  
63 Hence the total host population varies stochastically in time, but remains of the order of  $n$ .

64 Vaccination may either take place with probability  $p$  when a new susceptible host enters the  
65 population (e.g., early childhood vaccination ) or at a constant rate  $\nu$  for all other susceptible  
66 hosts (e.g., vaccination of adults). The immunity triggered by vaccination is assumed to wane at  
67 rate  $\omega_V$ , and natural immunity is assumed to wane at rate  $\omega_R$ . A host may be unvaccinated,  $U$ ,  
68 or vaccinated,  $V$ , and may either be uninfected or infected with the wild type,  $w$ , or a mutant  
69 strain,  $m$  (we assume coinfections are not possible). We thus have to track the numbers of two  
70 classes of susceptible hosts ( $S_U^n, S_V^n$ , where  $S^n = S_U^n + S_V^n$ ) and four classes of infected individuals  
71 ( $I_{Uw}^n, I_{Um}^n, I_{Vw}^n, I_{Vm}^n$ , where  $I^n = \sum_i I_{Ui}^n + I_{Vi}^n$ ). Recovered individuals are assumed to be fully  
72 protected (no reinfections) because natural immunity is expected to be more effective than immunity  
73 triggered by vaccination (we relax this assumption at the end of the paper). We further assume that  
74 the virulence  $\alpha_i$  (the mortality rate induced by the infection), the transmission  $\beta_i$  (the production  
75 rate of new infections), and the recovery  $\gamma_i$  (the rate at which the host clears the infection) are fully

76 governed by the pathogen genotype ( $i = w$  or  $m$ ). A fourth trait  $\epsilon_i \in [0, 1]$  governs the infectivity of  
77 pathogen genotype  $i$  on vaccinated hosts (infectivity of all genotypes is assumed to be equal to 1 on  
78 unvaccinated hosts). In other words, this final trait measures the ability of the pathogen to escape  
79 the immunity triggered by the vaccine. Note that these assumptions allow us to aggregate infected  
80 hosts irrespective of their vaccination status which simplifies the analysis below. For simplicity  
81 we assume frequency-dependent transmission where the number of contacts a host may have in  
82 the population is constant, but a proportion of those contacts may be infectious. Note, however,  
83 that other forms of transmission (e.g. density-dependent transmission [33]) are expected to yield  
84 qualitatively similar results. We summarize the states of the process and the jump rates at which  
85 individuals transition between states in **Table S1** and in **Figure 2**.

86 We use this model to examine the epidemiological and evolutionary dynamics following the  
87 start of a vaccination campaign. For the sake of simplicity, we focus our analysis on scenarios  
88 where the pathogen population has reached an endemic equilibrium before the start of vaccination.  
89 This is a strong assumption but our aim in this study is to focus on a simple scenario to understand  
90 the interplay between epidemiology and the stochastic fate of vaccine escape mutations. This is  
91 a necessary first step before studying more complex scenarios where vaccination starts before the  
92 epidemic has reached an endemic equilibrium. Note that we explore the robustness of our results  
93 at the end of the paper after relaxing some of our simplifying assumptions (see section 5.6).

94 Before going further in the analysis of the model we detail the default parameter values used to  
95 explore numerically the dynamics of viral adaptation in the figures presented in the following section  
96 (**Table 1**). We chose parameter values consistent with an acute viral infections of humans (e.g.  
97 SARS-CoV, Influenza...). The average lifespan of infected hosts is 64 years ( $\lambda = \delta = 3 \cdot 10^{-4} \text{ week}^{-1}$ )  
98 and the average duration of infection is 3.5 days ( $\gamma_w = 2 \text{ week}^{-1}$ ). The case mortality of the wild  
99 type virus is assumed to be  $\approx 1\%$  (i.e.  $\alpha_w/(\alpha_w + \gamma_w)$ ) and has a basic reproduction ratio of  
100  $R_w = \beta_w/(\delta + \alpha_w + \gamma) \approx 5$ . The immunity triggered by the infection or by the vaccination is  
101 around 4.5 months ( $\omega_R = \omega_V = 0.05 \text{ week}^{-1}$ ). The wild type virus is assumed to have a low  
102 probability to infect vaccinated hosts ( $\epsilon_w = 0.05$ ). As explained in the following section, we varied  
103 the phenotypic properties of the mutant virus but, crucially, we focused on mutants with the ability

104 to escape the immunity triggered by vaccination ( $\epsilon_m = 1$ ) and a lower basic reproduction ratio than  
 105 the wild type in a fully susceptible population (i.e. adaption to vaccination is assumed to carry some  
 106 fitness cost).

### 107 3 Results

#### 108 3.1 Deterministic Approximation

109 As a first step in our analysis, we use a deterministic approximation for large values of  $n$  [30] and  
 110 we work with host densities defined as  $S_i = S_i^n/n$ ,  $I_{ij} = I_{ij}^n/n$ ,  $N = N^n/n$ . This corresponds  
 111 to replacing discrete individuals by densities and interpreting the rates in **Figure 2** as describing  
 112 continuous flows rather than jumps. This yields a system of ordinary differential equations:

$$\begin{aligned}
 \dot{S}_U &= \lambda(1-p) + \omega_V S_V + \omega_R R - \left( \beta_w \frac{I_{Uw} + I_{Vw}}{N} + \beta_m \frac{I_{Um} + I_{Vm}}{N} + \delta + \nu \right) S_U \\
 \dot{S}_V &= \lambda p + \nu S_U - \left( \epsilon_w \beta_w \frac{I_{Uw} + I_{Vw}}{N} + \epsilon_m \beta_m \frac{I_{Um} + I_{Vm}}{N} + \delta + \omega_V \right) S_V \\
 \dot{I}_{Uw} &= \beta_w (I_{Uw} + I_{Vw}) \frac{S_U}{N} - (\delta + \alpha_w + \gamma_w) I_{Uw} \\
 \dot{I}_{Um} &= \beta_m (I_{Um} + I_{Vm}) \frac{S_U}{N} - (\delta + \alpha_m + \gamma_m) I_{Um} \\
 \dot{I}_{Vw} &= \epsilon_w \beta_w (I_{Uw} + I_{Vw}) \frac{S_V}{N} - (\delta + \alpha_w + \gamma_w) I_{Vw} \\
 \dot{I}_{Vm} &= \epsilon_m \beta_m (I_{Um} + I_{Vm}) \frac{S_V}{N} - (\delta + \alpha_m + \gamma_m) I_{Vm} \\
 \dot{R} &= (\gamma_w I_{Uw} + \gamma_w I_{Vw} + \gamma_m I_{Um} + \gamma_m I_{Vm}) - (\delta + \omega_R) R,
 \end{aligned} \tag{1}$$

113

114 It is also convenient to track the dynamics of the total density of hosts infected with the same  
 115 strain  $i$ ,  $I_i := I_{Ui} + I_{Vi}$ , which yields:

$$\dot{I}_i = \underbrace{\left( \left( \beta_i \frac{S_U}{N} + \epsilon_i \beta_i \frac{S_V}{N} \right) - (\delta + \alpha_i + \gamma_i) \right)}_{r_i = \text{growth rate of strain } i} I_i \tag{2}$$

116 The ability of the strain  $i$  to grow is given by the sign of the growth rate  $r_i$ . Note that this growth  
 117 rate depends on the four different traits of the pathogen:  $\alpha_i, \beta_i, \gamma_i, \epsilon_i$ . But this growth rate depends

118 also on the densities  $S_U$  and  $S_V$ , which vary with  $t$ , the time since the start of vaccination (i.e.,  
119 vaccination starts at  $t = 0$ ). The coefficient of selection  $s_m$  on the mutant strain relative to the  
120 wild type is:

$$s_m = r_m - r_w = (\beta_m - \beta_w) \frac{S_U}{N} + (\epsilon_m \beta_m - \epsilon_w \beta_w) \frac{S_V}{N} - (\alpha_m - \alpha_w + \gamma_m - \gamma_w) \quad (3)$$

121 In other words, both the genetics (the phenotypic traits of strain  $i$ ) and the environment (the  
122 epidemiological state of the host population) govern selection and strain dynamics.

### 123 3.2 Pathogen eradication and vaccination threshold

124 The ability of the strain  $i$  to grow can be measured by its effective per-generation reproduction  
125 ratio which is given by:

$$R_i^e = R_i \left( \frac{S_U}{N} + \epsilon_i \frac{S_V}{N} \right) \quad (4)$$

126 where  $R_i = \frac{\beta_i}{\delta + \alpha_i + \gamma_i}$ . Hence, a reduction of the availability of susceptible hosts with vaccination  
127 may drive down the density of the wild-type pathogen when the production of new infected hosts  
128 (infection “birth”) does not compensate for the recovery and death of infected hosts (infection  
129 “death”), that is when  $R_w^e < 1$ . Ultimately, vaccination can even lead to the eradication of the  
130 wild-type pathogen (**Figure 1a**) either when the vaccine is sufficiently efficient ( $\epsilon_w R_w > 1$ ) or when  
131 the vaccination coverage is sufficiently high [34, 16]. The deterministic model (1) can be used to  
132 identify the threshold  $\nu_c$  of the speed of vaccination rollout above which the wild-type pathogen  
133 can be driven to extinction (see Methods and SI Section 1):

$$\nu_c = \frac{R_w(\delta(1 - (1 - \epsilon_w)p) + \omega_V) - (\delta + \omega_V)}{1 - R_w \epsilon_w} \quad (5)$$

134 As expected, better vaccines (i.e., lower values of  $\epsilon_w$  and  $\omega_V$ ) yield lower threshold values for  
135 the speed of vaccination. Imperfect vaccines (i.e., higher values of  $\epsilon_w$  and  $\omega_V$ ), in contrast, are  
136 unlikely to allow eradication. Note that, if we wait sufficiently long, the population of the wild-

137 type pathogen will be driven to extinction in a *stochastic* way even when  $\nu < \nu_c$ . Indeed, in a  
138 finite host population, sooner or later, the pathogen population is doomed to go extinct because of  
139 demographic stochasticity, but the extinction time when  $\nu < \nu_c$  will usually be very long, increasing  
140 exponentially with the system size  $n$ . From now on, we are going to neglect the possibility of  
141 extinction of the wild type due to vaccination when  $\nu < \nu_c$  (which is a good approximation when  
142  $n$  is large).

143 The spread of a new pathogen variant may erode the efficacy of vaccination and, consequently,  
144 could affect the ability to control and, ultimately, to eradicate the pathogen. But before the  
145 replacement of the wild type by a vaccine-escape variant the pathogen population may go through  
146 three steps that may ultimately result (or not) in pathogen adaptation: (1) introduction of the  
147 vaccine-escape variant by mutation, (2) extinction (**Figure 1c**) or invasion (**Figure 1d-f**) of the  
148 vaccine-escape variant introduced by mutation, (3) fixation (**Figure 1f**) or not (**Figure 1d-e**) of  
149 the invading vaccine-escape variant. Each of these steps is very sensitive to stochasticity because  
150 the number of vaccine-escape variants is very small in the early phase of its emergence.

### 151 **3.3 Step 1: Introduction of the variant by mutation**

152 The first step of adaptation is driven by the production of new variants by the wild-type pathogen  
153 through mutation. The level of adaptation to unvaccinated and vaccinated hosts may vary among  
154 those variants [10]. Vaccine-escape mutations that do not carry any fitness costs (or may even  
155 be adaptive) in unvaccinated hosts are expected to invade and fix relatively easily irrespective of  
156 the vaccination strategy. We thus focus on variants that carry fitness costs in immunologically  
157 naïve hosts (i.e., variants *specialized* on vaccinated hosts [10]). In principle, the introduction of  
158 the vaccine-escape mutation may occur before the rollout of vaccination. The distribution of these  
159 mutations is expected to follow a stationary distribution resulting from the action of recurrent  
160 mutations and negative selection (see Methods). If these fitness costs are high and/or if the mutation  
161 rate is low these pre-existing mutants are expected to be rare. In the following, we neglect the  
162 presence of pre-existing mutants and we focus on a scenario where the first vaccine-escape mutant  
163 appears after the start of vaccination (but see Methods, section 5.5 where we discuss the effect of



164 standing genetic variation).

165 At the onset of the vaccination campaign (i.e.,  $t = 0$ ) we assume that the system is at the  
166 endemic equilibrium (i.e., the equilibrium densities  $S_U^0$ ,  $I_{Uw}^0$  and  $I_{Vw}^0$  are given in (13) in the  
167 Methods). We assume that an individual host infected with the wild type produces vaccine-escape  
168 mutants at a small, constant rate  $\theta_U/n$  if unvaccinated and  $\theta_V/n$  if vaccinated. We assume that  $\theta_U$   
169 and  $\theta_V$  are small enough that within-host clonal interference among vaccinated-adapted variants is  
170 negligible. The relative rates of mutation in the two types of hosts is unknown but the within-host  
171 selection may favor mutants in vaccinated hosts which may yield  $\theta_V \geq \theta_U$ . However, the lower viral  
172 load in vaccinated host may counteract this effect and may yield  $\theta_U \geq \theta_V$ . The total production  
173 of mutants is thus equal to  $\frac{\theta_U}{n} I_{Uw}^n(t) + \frac{\theta_V}{n} I_{Vw}^n(t) \approx \theta_U I_{Uw}(t) + \theta_V I_{Vw}(t)$ , so that the probability  
174 density  $f_m(t)$  of the arrival time  $t = t_m$  of the first vaccine-escape mutant is approximated by:

$$f_m(t) = (\theta_U I_{Uw}(t) + \theta_V I_{Vw}(t)) e^{-\int_0^t (\theta_U I_{Uw}(s) + \theta_V I_{Vw}(s)) ds}. \quad (6)$$

175 In other words, the time  $t_m$  at which the vaccine-escape variant is first introduced by mutation  
176 depends on the dynamics of the incidence of the infections by the wild type. Plots of  $f_m$  for different  
177 values of rollout speed  $\nu$  in **Figure 3** show that a faster rollout of vaccination delays the introduction  
178 of the vaccine-escape mutant. This effect is particularly marked when  $\omega_R = 0$  because life-long  
179 immunity is known to result in a massive transient drop of the incidence (the honey-moon period)  
180 [34, 13] which is expected to decrease the influx of new variants during this period (**Figure S1**).  
181 **Figure 3** also shows how higher values of  $\theta_V$  can increase the influx of vaccine-escape variants. As  
182 discussed in the following section, the subsequent fate of vaccine-escape mutants depends strongly  
183 on the timing of their arrival.

### 184 3.4 Step 2: Variant invasion

185 Immediately after its introduction, the dynamics of the vaccine-escape mutant may be approximated  
186 by a time-inhomogeneous birth-death process where the rate of birth (i.e., rate of new infections  
187 by the mutant) varies with the availability of susceptible hosts (see Methods, section 5.3). The  
188 probability that a single mutant with time-varying birth rate  $b_m(t) = \beta_m \left( \frac{S_U(t)}{N(t)} + \frac{\epsilon_m S_V(t)}{N(t)} \right)$  and

189 constant death rate  $d_m = \delta + \alpha_m + \gamma_m$ , introduced at time  $t_m$ , successfully invades (see [25] and  
 190 SI, Section 2) is:

$$P_m^{t_m} = \frac{1}{1 + \int_{t_m}^{\infty} d_m e^{-\int_{t_m}^t b_m(s) - d_m ds} dt} \quad (7)$$

191 Plotting the probability of invasion against  $t_m$  in **Figure 4** shows that the time at which the  
 192 vaccine-escape mutant is introduced has a dramatic impact on the probability of escaping early  
 193 extinction. If the mutant is introduced early, the density  $S_V(t)$  of susceptible vaccinated hosts  
 194 remains very low and the selection for the vaccine-escape mutant is too small to prevent stochastic  
 195 extinctions. The probability of invasion increases with selection, and thus with the density of  
 196 vaccinated hosts, which tends to increase with time (see equation (3)).

197 Taking  $t_m \rightarrow \infty$  allows us to tackle the situation when the vaccine-escape mutant appears at  
 198 the endemic equilibrium, i.e., when the densities of unvaccinated and vaccinated susceptible hosts  
 199 are  $S_U^*$  and  $S_V^*$ , respectively. At that point in time the effective per-generation reproduction ratio  
 200 of genotype  $i$  (i.e. the expected number of secondary infections produced by pathogen genotype  $i$ )  
 201 is:

$$R_i^* = R_i \left( \frac{S_U^*}{N^*} + \epsilon_i \frac{S_V^*}{N^*} \right) \quad (8)$$

202 By definition, at the endemic equilibrium set by the wild-type pathogen we have  $R_w^* = R_w^e = 1$ .  
 203 Hence, a necessary condition for the mutant to invade this equilibrium is  $R_m^* > 1$ , i.e., the effective  
 204 reproduction number of the mutant has to be higher than that of the wild type (see SI, Section 1).  
 205 However, this is not a sufficient condition: many mutants that satisfy this condition will rapidly  
 206 go extinct due to demographic stochasticity. But in contrast to an early introduction of the mu-  
 207 tant discussed above, the stochastic dynamics of the mutant is approximately a *time-homogeneous*  
 208 branching process because the birth rate of the mutant approaches  $b_m^* = \beta_i \left( \frac{S_U^*}{N^*} + \epsilon_i \frac{S_V^*}{N^*} \right)$ . This  
 209 birth rate is constant because the density of susceptible hosts remains constant at the endemic  
 210 equilibrium. The probability of mutant invasion after introducing a single host infected by the  
 211 mutant is thus (see SI Section 1; **Figure 4**):

$$P_m^* = \lim_{t_m \rightarrow \infty} P_m^{t_m} = 1 - \frac{R_w^*}{R_m^*} = 1 - \frac{1}{R_m^*} \quad (9)$$

212 Note that we recover the strong-selection result of [36]. This expression shows that *at this endemic*  
213 *equilibrium* the fate of the mutant is fully governed by the per-generation reproduction ratio of  
214 the two strains, but does not depend on the specific values of the life-history traits of the mutant  
215 (provided the different vaccine-escape variants have the same value of  $R_m^*$ ).

216 Interestingly, unlike  $P_m^*$ , the probability  $P_m^{t_m}$  of mutant invasion at time  $t_m$  given in (7) is not  
217 governed solely by  $R_i$ , but rather depends on the life-history traits of the mutants. For instance,  
218 assume that two vaccine-escape mutants have the same values of  $R_m$  and  $\epsilon_m$  but they have very  
219 different life-history strategies. The “slow” strain has low rates of transmission and virulence (in  
220 green in **Figure 4**) while the “fast” strain has high rates of transmission and virulence (in red  
221 in **Figure 4**). **Figure 4** shows that the high mortality rate of hosts infected by the fast strain  
222 increases the risk of early extinction and lowers the probability of invasion relative to the slow  
223 strain. Hence, in the early stage of adaptation, pathogen life-history matters and favours slow  
224 strains with lower rates of transmission and virulence.

### 225 **3.5 Step 3: After variant invasion**

226 Successful invasion of the vaccine-escape mutant means that it escaped the “danger zone” when its  
227 density is so low that it is very likely to go extinct (**Figure 1d-f**). After this invasion we can describe  
228 the dynamics of the polymorphic pathogen population using the deterministic approximation (1).

229 Because the invasion of the mutant at the endemic equilibrium set by the wild type requires  
230 that  $R_m^* > R_w^*$ , we may expect from the analysis of the deterministic model that the mutant would  
231 always replace the wild-type pathogen. That is, the wild-type pathogen would go extinct before  
232 the mutant (**Figure 1f**). This is indeed the case when the phenotypes of the mutant and the wild  
233 type are not very different because of the “invasion implies fixation” principle [17, 5, 38]. Yet, this  
234 principle may be violated if the phenotype of the vaccine-escape mutant is very different than the  
235 phenotype of the wild type.

236 First, the long-term coexistence of the two genotypes is possible (**Figure 1e**). The coexistence  
237 requires that each genotype is specialized on distinct types of host. The wild-type is specialised  
238 on unvaccinated hosts (i.e.  $R_w > R_m$ ) and the mutant is specialised on the vaccinated hosts (i.e.

239  $\epsilon_m > \epsilon_w$ ). Intermediate rates of vaccination maintain a mix of vaccinated and unvaccinated host  
240 wich promotes coexistence between the two genotypes (**Figure S2**). Second, the vaccine-escape  
241 mutant may be driven to extinction before the wild type if its life-history traits induce massive  
242 epidemiological perturbations after its successful invasion (**Figure 1d**). As pointed out by previous  
243 studies, more transmissible and aggressive pathogen strategies may yield larger epidemics because  
244 the speed of the epidemic is governed by the per-capita growth rate  $r_i$ , not by the per-generation  
245 reproduction ratio  $R_i$  [13]. This explosive dynamics is driven by an over-exploitation of the host  
246 population and is immediately followed by a massive decline in the incidence of the vaccine-escape  
247 mutant. In a finite host population, this may result in the extinction of the vaccine-escape mutant  
248 before the wild type [42]. We capture this outcome with a hybrid analytical-numerical approach that  
249 computes the probability  $P_{fix}^{t_m}$  that the wild type will go extinct before the mutant (see Methods,  
250 section 5.4). **Figure 5** shows that two vaccine-escape mutants may have very different probabilities  
251 of fixation, even if they have the same per-generation reproduction ratio. The numerical compu-  
252 tation of the probability of fixation agrees very well with individual-based stochastic simulations.  
253 The faster strain is unlikely to go to fixation because invasion is followed by a period where the  
254 birth rate drops to very low levels (far below the mortality rates, **Figure S3**). In other words, a  
255 more aggressive strategy will more rapidly degrade its environment, by depleting susceptible hosts,  
256 which is known to increase the probability of extinction [6]. Interestingly, this effect is only appar-  
257 ent when the time of introduction  $t_m$  is large. Indeed, when the mutant is introduced soon after  
258 the start of vaccination, its probability of invasion is already very low because its initial growth  
259 rate is negative (**Figure S3a, b, c**). When the mutant is introduced at intermediate times, the  
260 initial growth rate of the mutant is positive because some hosts are vaccinated (**Figure S3d, e,**  
261 **f**). If the vaccine-escape mutant is introduced later, the growth rate of the mutant is initially very  
262 high as many hosts are vaccinated (and thus susceptible to the vaccine-escape mutant) but this  
263 is rapidly followed by a drop in host density (especially pronounced with the faster strain) which  
264 prevents the long-term establishment of the faster strain (see **Figure S3g, h, i**).

### 265 3.6 The overall risk of pathogen adaptation

266 The overall probability that the pathogen will adapt to vaccination (*i.e.* that a vaccine-escape  
267 variant invades and eventually replace or coexist with the wild-type) depends upon the probability  
268 that the mutation will arise (step 1) and the probability that this mutation will escape early  
269 extinction (step 2) and eventually go to fixation (step 3). It is particularly relevant to explore the  
270 effect of the speed of vaccination rollout on the overall probability that some vaccine-escape variant  
271 invades before a time  $t$  after the start of the vaccination campaign (steps 1 and 2, **Figure 6**):

$$A_m^t = 1 - e^{-\int_0^t (\theta_U I_{Uw}(s) + \theta_V I_{Vw}(s)) P_m^s ds}. \quad (10)$$

272 When  $\nu > \nu_c$ , vaccination is expected to eradicate the disease rapidly. But an escape mutation  
273 may appear by mutation before eradication and rescue the pathogen population. This scenario  
274 fits squarely within the framework of classical “evolutionary rescue” modeling [32, 2, 4]. Yet,  
275 vaccination rollout is unlikely to be fast enough to eradicate the wild-type pathogen and, in this  
276 case, the probability of adaptation goes to 1 when  $t \rightarrow \infty$ . Indeed, when  $\nu < \nu_c$ , a vaccine-  
277 escape variant will eventually appear by mutation and invade. But what is less clear is how fast  
278 this adaptation will take place. We can use equation (10) to explore the effect of the speed of  
279 adaptation on the probability of pathogen adaptation at time  $t$  after the start of vaccination (*i.e.*  
280 the speed of adaptation). Crucially, the speed of pathogen adaptation is maximized for intermediate  
281 values of the speed of vaccination rollout. This is due to the antagonistic consequences the speed  
282 of the rollout has upon these two steps of adaptation (compare **Figures 3 and 4**). Faster rollout  
283 reduces the influx of new mutations, but increases selection for vaccine-escape mutations.

284 To illustrate this ambivalent effect we can first examine how the speed of vaccination rollout  
285 decreases the probability  $M_m^t$  that at least one escape mutation is introduced before time  $t$  (blue  
286 curve in **Figure 6**):

$$M_m^t = 1 - e^{-\int_0^t (\theta_U I_{Uw}(s) + \theta_V I_{Vw}(s)) ds}. \quad (11)$$

287 Second, we can examine how the speed of vaccination rollout increases the probability that a mutant  
288 invades which can be approximated by  $P_m^*$  (see equation (9)) when  $t$  is sufficiently large (purple

289 curve in **Figure 6**). The overall probability of adaptation can be well approximated by:

$$A_m^t \approx 1 - e^{-\int_0^t (\theta_U I_{Uw}(s) + \theta_V I_{Vw}(s)) ds} P_m^* \approx M_m^t P_m^*. \quad (12)$$

290 This approximation captures how the speed of adaptation results from the balance between the  
291 influx of new mutations and the invasion success of these mutations. Interestingly, for low speed of  
292 vaccination rollout, the invasion of the escape mutant may not necessarily lead to the fixation of  
293 the new variant. Indeed, with low vaccination rollout yields a large fraction of the host population  
294 remains naïve and this heterogeneity can promote the coexistence between two specialist pathogens:  
295 the wild-type is specialised on naïve hosts and the escape mutant is specialised on vaccinated hosts  
296 (**Figure S2**).

## 297 4 Discussion

298 Vaccination is a powerful tool to control the spread of infectious diseases, but some pathogens  
299 evolve to escape the immunity triggered by vaccines (e.g. flu, SARS-CoV-2). Will they continue  
300 to adapt to the different vaccines that are being used to halt their spread? Does the likelihood of  
301 this adaptation depend on the speed of the vaccination rollout? To answer these questions we must  
302 first understand the different steps that may eventually lead to adaptation to vaccination.

303 Mutation is the fuel of evolution, and the first step of adaptation to vaccination is the mutational  
304 process that produces vaccine-escape variants. Even if initial estimates of SARS-CoV-2 mutation  
305 rates were reassuringly low [39], the virus has managed to evolve higher rates of transmission [9, 46]  
306 and these adaptations are challenging current control measures used to slow down the ongoing  
307 pandemic. The ability of the new variants of SARS-CoV-2 to escape immunity is also worrying  
308 and indicates that viral adaptation can weaken vaccine efficacy [47, 37]. The rate at which these  
309 potential vaccine-escape mutations are introduced depends on the density of hosts infected by the  
310 wild-type virus. In this respect, a faster rollout of vaccination is expected to delay the arrival of  
311 these mutations (**Figure 3**).

312 Some authors have argued that the emergence of vaccine-escape mutations may be more likely

313 in infected hosts which are partially immunized [12, 8, 10]. Our model can be used to explore the  
314 consequences of this within-host evolution in vaccinated hosts (*e.g.*, taking  $\theta_V > \theta_U$ ). A larger  
315 value of  $\theta_V$  increases the overall rate of mutation (**Figure 3**) but this effect is modulated by the  
316 fraction of the host population that is vaccinated. Consequently, when  $\theta_V > \theta_U$ , the speed of vac-  
317 cination rollout can have a non-monotonic effect on the probability that a vaccine-escape mutation  
318 is introduced (see **Figure S4**). Indeed, when the rate of vaccination remains low, the enhancing  
319 effect of vaccination on the rate of introduction of new mutations can counteract the delaying effect  
320 of faster vaccination rollout discussed above. But the probability that a vaccine-escape mutation  
321 is introduced drops to very low levels when the rate of vaccination becomes overwhelmingly high.

322 The second step of adaptation starts as soon as the vaccine-escape mutant has been introduced  
323 in the pathogen population. Will this new variant go extinct rapidly or will it start to invade? The  
324 answer to this question depends on the time at which the mutant is introduced. If the mutant is  
325 introduced when the population is not at an endemic equilibrium, the fate of the mutant depends  
326 on a time-varying birth rate which is driven by the fluctuations of the density of susceptible hosts.  
327 In our model early introductions are likely to result in rapid extinction because there are simply  
328 not enough vaccinated hosts to favour the mutant over the wild type. Moreover, we found that  
329 earlier introductions are likely to favour slower life-history strategies which are less prone to early  
330 extinction. If the introduction takes place later, when the system has reached a new endemic  
331 equilibrium, the fate of the mutant is solely governed by the effective per-generation ratio  $R_m^*$   
332 and does not depend on the life-history traits of the mutant. Slow and fast variants have equal  
333 probability to invade if they have the same  $R_m^*$ . Altogether, our results suggest that earlier arrival  
334 may not always facilitate invasion since the probability of invasion is limited by the time-varying  
335 epidemiological state of the host population.

336 The third step of adaptation starts as soon as the hosts infected by the vaccine-escape mutant  
337 are abundant and the effect of demographic stochasticity on the dynamics of this mutation becomes  
338 negligible. Our analysis attempts to better characterize the dynamics of the mutant after invasion  
339 using a combination of deterministic and analytical approximations. In principle, conditional on  
340 invasion, we can use the deterministic model (1) to describe the joint dynamics of the mutant and

341 the wild type. In particular, the speed at which the vaccine-escape mutant spreads in the pathogen  
342 population can be well approximated by the deterministic model. This may be particularly useful to  
343 address the impact of various vaccination strategies on the speed of the spread of a vaccine-escape  
344 variant [15]. In the present work we show that life-history traits of the vaccine-escape mutant  
345 drive the speed of its spread. Indeed, as pointed out before, the deterministic transient dynamics  
346 depends on the per-capita growth rate of the mutant  $r_m$ , not its per-generation reproduction ratio  
347  $R_m$  [13]. Transient dynamics may favour a fast and aggressive variant because this life-history  
348 strategy may be more competitive away from the endemic equilibrium. Yet, this explosive strategy  
349 may be risky for the pathogen if it leads to epidemiological fluctuations that result in a massive  
350 drop in the number of infections. The consequences of such fluctuations on the extinction risk of  
351 the variant can be accounted for by a generalized birth-death process where the per-capita growth  
352 rate of the mutant varies with time. Epidemiological fluctuations lead to a degradation of the  
353 future environment (i.e., depletion of the density of susceptible hosts) which results in an increased  
354 risk of extinction [25, 6].

355 A comprehensive understanding of pathogen dynamics after vaccination relies on the use of  
356 a combination of theoretical tools to capture the interplay between stochastic and deterministic  
357 forces. Here, we use a hybrid numerical-analytical approach to account for the three successive steps  
358 that may eventually lead to the fixation of a vaccine-escape mutant. This theoretical framework  
359 is particularly suitable to explore the influence of different vaccination strategies on the risk of  
360 pathogen adaptation. In particular, we show that this risk drops to very low levels even when the  
361 speed of vaccination rollout is below the threshold value that may eventually lead to eradication  
362 (i.e.,  $\nu < \nu_c$ ). In other words, faster vaccination rollout makes sense even when eradication is  
363 infeasible, because faster rollout decreases both the number of cases and the likelihood of pathogen  
364 evolution. This conclusion is akin to the general prediction that the rate of pathogen adaptation  
365 should be maximized for intermediate immune pressure or for medium doses of chemotherapy at the  
366 within-host level [20, 40, 19, 1, 21, 11, 2]. Most of these earlier studies focused on evolutionary rescue  
367 scenarios where the wild type is expected to be rapidly driven to extinction by human intervention.  
368 Our versatile theoretical framework, however, allows us to deal with a broader range of situations



369 where the intervention is not expected to eradicate the wild type pathogen. Accounting for the  
370 dynamics of the wild type affects both the flux of mutation and the fate of these mutations.

371 The framework we have developed can be readily extended to explore many other situations.  
372 For instance, our model can be modified to explore the influence of temporal variations in the  
373 environment that could be driven by seasonality or by non-pharmaceutical interventions (NPIs).  
374 We explored a situation where the transmission rate of all variants is periodically reduced by a  
375 quantity  $1 - c(t)$ , where  $c(t)$  is a measure of the intensity of NPIs. These periodic interventions affect  
376 both the flux of mutations and the probability that these mutations invade. In particular, NPIs  
377 lower the probability of mutant introduction through the reduction in the density of hosts infected  
378 by the wild type (**Figure S4**). As a consequence, the probability of adaptation is reduced when  
379 vaccination is combined with periodic control measures. Hence, our approach helps to understand  
380 the interaction between vaccination and NPI discussed in earlier studies [41, 31].

381 We have made several simplifying assumptions that need to be relaxed to confidently apply our  
382 findings to a broader range of pathogens such as the current SARS-CoV-2 pandemic (see section  
383 5.6 in the Methods). First, one should study situations where the pathogen population has not  
384 reached an endemic equilibrium when vaccination starts to be applied. We carried out additional  
385 simulations showing that starting the vaccination rollout sooner (i.e. just after the start of the  
386 epidemic) tends to promote the probability of invasion of the escape mutant (**Figure S5**). Indeed,  
387 at the onset of the epidemic the density of susceptible hosts is higher (i.e. the birth rate of the  
388 infection is high relative to the endemic equilibrium) and the risk of early extinction of the mutant  
389 is reduced. Second, it is important to relax the assumption that natural immunity is perfect.  
390 We carried out additional simulations showing that when naturally immune hosts, like vaccinated  
391 hosts, can be reinfected the probability of invasion of the escape mutant increases (**Figure S6**).  
392 This effect is particularly strong just after the start of vaccination. Indeed, if naturally immune  
393 hosts are equivalent to vaccinated hosts, selection to escape immunity is present even before the  
394 start of vaccination and one may thus expect the speed of adaptation to be much faster and to be  
395 relatively independent of the vaccination strategy. Another important extension of our model would  
396 be to study the effect of a diversity of vaccines in the host population. We did not explore this

397 effect in the present study but this diversity of immune profiles among vaccinated hosts could slow  
398 down pathogen adaptation if the escape of different vaccines requires distinct mutations [45, 7, 35].  
399 Finally, it is important to recall that we focus here on a simplified scenario where we analyse the  
400 evolutionary epidemiology of an isolated population. In real-life situations the arrival time may  
401 depend more on the immigration of new variants from abroad than on local vaccination policies. The  
402 influence of migration remains to be investigated in spatially structured models where vaccination  
403 may vary among populations [18].

## 404 **5 Methods**

405 In this section, we present how extinction, invasion and fixation probabilities may be obtained  
406 under strong-selection assumptions when a mutant strain appears in a host-pathogen system that  
407 is away from its endemic equilibrium. Our essential tools are the deterministic ordinary differential  
408 equations (1) and birth-and-death approximations, which we discuss below. The former allows us to  
409 consider the situation when all strains are abundant, the latter when at least one strain is rare. We  
410 will limit ourselves to an informal treatment, presenting heuristic arguments and deferring rigorous  
411 proofs and sharp error bounds to a future treatment. In the following we present a simple, yet  
412 versatile, hybrid (i.e., semi-deterministic) framework which allows us to approximate the probabili-  
413 ties associated with different steps of adaptation (mutation, invasion, fixation) via adding auxiliary  
414 equations describing stochastic phenomena, to the deterministic ordinary differential equations  
415 describing the global population dynamics.

### 416 **5.1 Before the introduction of a variant**

417 We assume that vaccination starts after the monomorphic population of the wild-type pathogen  
418 has reached its endemic equilibrium,

$$\begin{aligned}
 S_U^0 &= \frac{\lambda(\delta + \gamma_w + \omega_R)}{\delta(\beta_w - \alpha_w) + \omega_R(R_w(\alpha_w + \delta) - \alpha_w)} \\
 S_V^0 &= 0 \\
 I_{Uw}^0 &= \frac{\lambda(R_w - 1)(\delta + \omega_R)}{\delta(\beta_w - \alpha_w) + \omega_R(R_w(\alpha_w + \delta) - \alpha_w)} \\
 I_{Vw}^0 &= 0 \\
 R^0 &= \frac{\lambda(R_w - 1)\gamma_w}{\delta(\beta_w - \alpha_w) + \omega_R(R_w(\alpha_w + \delta) - \alpha_w)}
 \end{aligned} \tag{13}$$

419 We then use the following ordinary differential equations to track the deterministic dynamics  
 420 of the wild-type pathogen using the endemic equilibrium before vaccination (13) as the initial  
 421 condition:

$$\begin{aligned}
 \dot{S}_U &= \lambda(1 - p) + \omega_V S_V + \omega_R R - \left( \beta_w \frac{I_{Uw} + I_{Vw}}{N} + \delta + \nu \right) S_U \\
 \dot{S}_V &= \lambda p + \nu S_U - \left( \epsilon_w \beta_w \frac{I_{Uw} + I_{Vw}}{N} + \delta + \omega_V \right) S_V \\
 \dot{I}_{Uw} &= \beta_w (I_{Uw} + I_{Vw}) \frac{S_U}{N} - (\delta + \alpha_w + \gamma_w) I_{Uw} \\
 \dot{I}_{Vw} &= \epsilon_w \beta_w (I_{Uw} + I_{Vw}) \frac{S_V}{N} - (\delta + \alpha_w + \gamma_w) I_{Vw} \\
 \dot{R} &= (\gamma_w I_{Uw} + \gamma_w I_{Vw}) - (\delta + \omega_R) R \\
 \dot{N} &= \lambda - \delta N - \alpha_w (I_{Uw} + I_{Vw}).
 \end{aligned} \tag{14}$$

Letting  $I_w = I_{Uw} + I_{Vw}$ , we get from (14):

$$\dot{I}_w = \beta_w (S_U + \epsilon_w S_V) \frac{I_w}{N} - (\delta + \alpha_w + \gamma_w) I_w.$$

A new endemic equilibrium will thus be approached after vaccination if and only if the growth rate  $r_w = \beta_w (S_U + \epsilon_w S_V) / N - (\delta + \alpha_w + \gamma_w)$  is positive, or equivalently if the effective per-generation reproduction ratio

$$R_w^e = R_w \left( \frac{S_U}{N} + \epsilon_w \frac{S_V}{N} \right)$$

422 is larger than 1, when  $S_U$  and  $S_V$  are taking their stationary values  $\tilde{S}_U$  and  $\tilde{S}_V$  in the absence of  
 423 infection. Computing these values (see SI, Section 1) shows that  $R_w^e > 1$  if and only if  $e_w R_w > 1$

424 or  $\nu > \nu_c$ , where

$$\nu_c = \frac{R_w(\delta(1 - (1 - \epsilon_w)p) + \omega_V) - (\delta + \omega_V)}{1 - R_w\epsilon_w} \quad (15)$$

425 Thus we see that if  $\epsilon_w R_w < 1$  and the speed of the vaccination rollout is higher than the critical  
426 value  $\nu_c$  the wild type will be driven to extinction.

427 For values of the vaccination rollout  $\nu$  smaller than this threshold  $\nu_c$ , or when  $e_w R_w > 1$ , the  
428 wild-type may also go extinct due to demographic stochasticity. We can neglect this possibility  
429 because the timescale of stochastic extinction from abundances of the order of  $n$  is much larger  
430 than those of the processes under consideration.

## 431 5.2 Introduction of the variant by mutation (step 1)

432 As indicated above, we use a time-inhomogeneous Poisson point process to model the influx of  
433 new mutations. The per capita rate of mutation is assumed to be constant through time but  
434 whether or not a mutant will escape extinction within a host may depend on the type of host.  
435 Indeed, a vaccine-escape mutation may have a higher probability to escape within-host extinction in  
436 vaccinated hosts. We account for this effect by making a distinction between  $\theta_U$  and  $\theta_V$ . If vaccine-  
437 escape mutations are more likely to escape extinction in vaccinated hosts we expect  $\theta_V > \theta_U$ . In  
438 other words,  $\theta_V/\theta_U - 1$  is a measure of the within-host fitness advantage of the vaccine-escape  
439 mutant in vaccinated hosts (they are assumed to have the same within-host fitness in naïve hosts).

440 We can compute the probability that some of the vaccine-escape mutations are present as  
441 standing variation before the start of vaccination. When the resident population has reached its  
442 endemic equilibrium  $(S_U^0, 0, I_{Uw}^0, 0, N^0)$ , the number of mutants is approximated by a birth-and-  
443 death process with immigration, with birth rate  $b_m^0 = \beta_m \frac{S_U^0}{N^0}$  and death rate  $d_m = \delta + \alpha_m + \gamma_m$ ,  
444 and the “immigration” is actually mutations arising in the resident population, which occur at rate  
445  $\mu_m = \theta_U I_{Uw}^0$ . Because we assume that in a fully naïve host population vaccine-escape mutations  
446 carry a fitness cost relative to the resident strain, we have  $b_m^0 < d_m$ . The number of mutants  
447 thus approximately follows a subcritical birth-and-death process with immigration, which is known  
448 to converge in distribution as  $t \rightarrow \infty$  to a negative binomial stationary distribution [24]. The

449 probability that there are  $k$  infected individuals hosting the mutant pathogen at time  $t = 0$  is thus:

$$p_k = \binom{k+r-1}{k} (1 - R_m^0)^r (R_m^0)^k \quad (16)$$

450 where  $r = \mu_m/b_m^0$  and  $R_m^0 = b_m^0/d_m$ . Hence the the expected number of vaccine-escape mutants  
451 already present at the start of vaccination is

$$\frac{\mu_m}{d_m - b_m}. \quad (17)$$

452 This result is analogous to the classical result that the expected frequency of deleterious mutations  
453 is of the form  $\mu/s$  where  $\mu$  is the rate of mutation towards deleterious mutants and  $s$  is the fitness  
454 cost of those deleterious mutants.

455 We can also compute the probability that no mutant is present at the start of vaccination:

$$p_0 = (1 - R_m^0)^r \quad (18)$$

456 When either  $R_m^0$  or  $r$  is small,  $p_0 \approx 1$ , and we can neglect the presence of preexisting mutants.  
457 Otherwise, we need to account for the possibility that one or more mutants are present at time  
458  $t = 0$ , which we discuss in Section 5.5 below.

459 We now assume that there is no mutant present at the start of vaccination. We are interested  
460 in the law of the first time  $t_m$  at which a mutant appears. Because  $\theta_U I_{Uw}(t) + \theta_V I_{Vw}(t)$  is the flux  
461 of vaccine-escape mutants from the wild-type population, by the exponential formula for Poisson  
462 point processes, we have [28]:

$$\mathbb{P}\{t_m > t\} = e^{-\int_0^t (\theta_U I_{Uw}(s) + \theta_V I_{Vw}(s)) ds}. \quad (19)$$

463 We can numerically compute the probability density function  $f_m$  of the first arrival time  $t_m$  of a  
464 vaccine-escape mutant using

$$f_m(t) = \dot{F}_m(t) e^{-F_m(t)}, \quad (20)$$

465 where  $F_m(t)$  is given by the auxiliary equation

$$\dot{F}_m = \theta_U I_{Uw}(t) + \theta_V I_{Vw}(t) \quad (21)$$

466 with initial condition  $F_m(0) = 0$ , while we compute  $I_{Uw}(t)$  and  $I_{Vw}(t)$  using (14). The use of this  
467 auxiliary equation reduces computational effort by obtaining  $F_m(t)$  simultaneously with  $I_{Uw}(t)$  and  
468  $I_{Vw}(t)$  (as opposed to computing the latter and then integrating).

### 469 5.3 Invasion of the variant (step 2)

470 Suppose that a mutant strain appears at time  $t_m \geq 0$  in a single infected host, that is, with density  
471  $I_m(0) = \frac{1}{n}$ , (which is effectively zero as  $n$  becomes large). Then, (2) yields  $I_m(t_m) \equiv 0$  for all  $t$ ,  
472 whereas the dynamics of the system follows (14). This differential equation approximation does  
473 not mean that the mutant is absent, but simply not in sufficient numbers to be visible at the coarse  
474 resolution and short time scale upon which (14) is applicable.

475 Then we combine (14) with a birth-and-death process approximation,  $\tilde{I}_m(t)$ , to the *number*  
476 of individuals infected with the mutant strain at time  $t$  after the mutant arrival time  $t_m$ ,  $I_m^n(t)$ .  
477 We approximate the rate of new infections,  $\frac{\beta_m(S_U^n(t) + \epsilon_m S_V^n(t))}{N^n(t)}$  by replacing the stochastic quantities  
478  $S_U^n(t)$ ,  $S_V^n(t)$  and  $N^n(t)$  by their deterministic approximations, giving the time-dependent birth  
479 rate

$$b_m(t) = \frac{\beta_m(S_U(t) + \epsilon_m S_V(t))}{N(t)}$$

480 where  $S_U(t)$ ,  $S_V(t)$  and  $N(t)$  are determined via the deterministic system (14). Each death in the  
481 birth-and-death process corresponds to the removal of a susceptible, which occurs by host death or  
482 recovery at combined rate  $d_m = \delta + \alpha_m + \gamma_m$ . See §8.2 in the Supplementary Information of [36]  
483 for a rigorous justification.

484 The so-called “merciless dichotomy” [23] tells us that the time-inhomogeneous birth-and-death  
485 process started with one individual at time  $t_m$  either goes extinct, or grows without bound (i.e.

486 invades) with probability (see [25] and SI, Section 2)

$$P_m^{t_m} = \frac{1}{1 + \int_{t_m}^{\infty} d_m e^{-\int_{t_m}^t b_m(s) - d_m ds} dt}$$

487 Thus, either the mutant strain vanishes, or the number infected with the mutant strain will even-  
 488 tually be of the order of  $n$  individuals, after which we can use (1) to compute the densities of both  
 489 wild-type and mutant strains.

In practice, we can compute the probability of mutant invasion when the mutant is introduced at time  $t_m$  using  $P_m^{t_m} = U_m^{t_m}(\infty)$  where  $U_m^{t_m}(\infty)$  is obtained via the pair of auxiliary functions  $U_m^{t_m}$  and  $V_m^{t_m}$  [25] defined as follows:  $U_m^{t_m}(t) = \mathbb{P}\{\tilde{I}_m(t) \neq 0\}$  and  $V_m^{t_m}(t) = \mathbb{P}\{\tilde{I}_m(t) = 1 \mid \tilde{I}_m(t) \neq 0\}$ . We then have

$$\dot{U}_m^{t_m} = -d_m U_m^{t_m} V_m^{t_m} \tag{22}$$

$$\dot{V}_m^{t_m} = (d_m - b_m(t)) V_m^{t_m} - d_m (V_m^{t_m})^2, \tag{23}$$

490 where  $U_m^{t_m}(t_m) = V_m^{t_m}(t_m) = 1$  and we compute  $b_m(t)$ ,  $S_U(t)$ ,  $S_V(t)$  and  $N(t)$ , via (14). In practice,  
 491 we cannot compute  $U_m^{t_m}(\infty)$ ; to obtain an approximation we evaluate  $U_m^{t_m}(t)$  for sufficiently large  
 492  $t$  that  $|U_m^{t_m}(t + \Delta t) - U_m^{t_m}(t)|$  is less than our desired threshold of error.

493 Note that several variants can arise and fail to invade before finally a lucky variant manages to  
 494 invade. We can use the probability of invasion  $P_m^t$  of a variant introduced at time  $t$  to characterize  
 495 the distribution of the first time  $t_i$  at which a mutant is introduced that successfully invades. By  
 496 the thinning property of Poisson point processes, we have [28]:

$$\mathbb{P}\{t_i > t\} = e^{-\int_0^t (\theta_U I_{Uw}(s) + \theta_V I_{Vw}(s)) P_m^s ds} \tag{24}$$

497 where  $\theta_U I_{Uw}(t) + \theta_V I_{Vw}(t)$  is the flux of vaccine-escape mutants from the wild-type population.  
 498 We compute numerically the probability density function  $g_m$  of the first arrival time  $t_i$  of a vaccine-

499 escape mutant that successfully invades using

$$g_m(t) = \dot{G}_m(t)e^{-G_m(t)}, \quad (25)$$

500 where  $G_m(t)$  is given by the auxiliary equation

$$\dot{G}_m(t) = (\theta_U I_{Uw}(t) + \theta_V I_{Vw}(t)) P_m^t \quad (26)$$

501 with initial condition  $G_m(0) = 0$  and computing  $I_{Uw}(t)$  and  $I_{Vw}(t)$  using (14).

Compare (24) with (19) and note that the probability that no vaccine-escape mutant will ever *arise* is

$$\mathbb{P}\{t_m = \infty\} = e^{-\int_0^\infty (\theta_U I_{Uw}(t) + \theta_V I_{Vw}(t)) P_m^t dt}.$$

In contrast, the probability that no vaccine-escape mutant will ever *invade* is the larger probability

$$\mathbb{P}\{t_i = \infty\} = e^{-\int_0^\infty (\theta_U I_{Uw}(t) + \theta_V I_{Vw}(t)) P_m^t dt}.$$

Note that  $P_m^t$  converges as  $t \rightarrow \infty$  to  $P_m^* = 1 - 1/R_m^*$  which is nonzero, so that

$$\mathbb{P}\{t_m = \infty\} = 0 \Leftrightarrow \int_0^\infty (\theta_U I_{Uw}(t) + \theta_V I_{Vw}(t)) dt = \infty \Leftrightarrow \mathbb{P}\{t_i = \infty\} = 0,$$

502 that is, the probability of adaptation is 1 if and only if  $t \mapsto (\theta_U I_{Uw}(t) + \theta_V I_{Vw}(t))$  is not integrable.

503 In other words, the probability of adaptation is 1 in the limit  $t \rightarrow \infty$  when the wild type is not

504 driven to extinction by vaccination (i.e.  $\nu < \nu_c$ ) which implies that there is an uninterrupted flux of

505 mutation producing vaccine-escape variants. One of these mutants will eventually escape extinction

506 and invade. Yet, the time needed for a successful variant to appear may be very long and we focus

507 in the main text on  $A_m^t$  the probability of adaptation before time  $t$  (equation (10) and Figure 6).



508 **5.4 Fixation of the variant (step 3)**

509 Suppose now that the mutant strain successfully invades; we next consider the probability  $P_{fix}$   
 510 that the mutant will outcompete the wild type and go to fixation. Fixation of the mutant occurs if  
 511 it is still present when the wild-type strain disappears. If we let  $T_m$  and  $T_w$  be the extinction times  
 512 of mutant and wild-type strains, the probability of mutant fixation is thus  $\mathbb{P}\{T_w < T_m\}$  which we  
 513 may decompose as

$$\begin{aligned} \int_{t_m}^{\infty} \mathbb{P}\{T_m > t\} \mathbb{P}\{T_w \in dt\} &= - \int_{t_m}^{\infty} \mathbb{P}\{T_m > t\} \frac{d}{dt} \mathbb{P}\{T_w > t\} dt \\ &= - \int_{t_m}^{\infty} \mathbb{P}\{I_m^n(t) > 0\} \frac{d}{dt} (1 - \mathbb{P}\{I_w^n(t) = 0\}) dt \quad (27) \\ &= \int_{t_m}^{\infty} \mathbb{P}\{I_m^n(t) > 0\} \frac{d}{dt} \mathbb{P}\{I_w^n(t) = 0\} dt. \end{aligned}$$

514 We again obtain estimates of  $\mathbb{P}\{I_w^n(t) > 0\}$  and  $\mathbb{P}\{I_m^n(t) > 0\}$  using the fact that conditional  
 515 on  $S_U(t)$ ,  $S_V(t)$  and  $N(t)$ ,  $(\tilde{I}_w(t), \tilde{I}_m(t))$  follows a time-inhomogeneous, two-type birth-and-death  
 516 process, where the birth rates for the two types,  $i = w, m$ , are given by

$$b_i(t) = \frac{\beta_i(S_U(t) + \epsilon_i S_V(t))}{N(t)}$$

517 and the death rates are  $d_i = \delta + \alpha_i + \gamma_i$ . The birth rates vary with time due to the epidemiological  
 518 perturbations following the start of vaccination and in particular, to the feedback of mutant invasion  
 519 on  $S_V$  and  $S_U$ . To quantify these epidemiological perturbations, we now approximate the density  
 520 of susceptibles and total host density by the values of  $S_U(t)$ ,  $S_V(t)$  and  $N(t)$  obtained from the full  
 521 deterministic system (1), which accounts for the presence of the mutant by replacing  $I_m$  with its  
 522 *expected value*.

523 We need to take care in choosing the initial conditions of (1) to account for the fact that we  
 524 consider the time of appearance of the first mutant that successfully invades and so are conditioning  
 525 on the non-extinction of the mutant strain, and for the inherent variability in the time required to  
 526 invade; this results in a random initial condition for the deterministic dynamics (see Supplementary  
 527 Information §4 for details). In practice, we find that the randomness has negligible effect, but

528 we must still take the conditioning into account. To do so, we first use (14) to compute the  
 529 epidemiological dynamics of the wild type before the introduction of the mutant at time  $t_m$ . Then,  
 530 at time  $t_m$ , we use (1) where  $S_U(t_m)$ ,  $S_V(t_m)$ ,  $N(t_m)$  and  $I_w(t_m)$  are obtained from (14) and take  
 531  $I_m(t_m) = \frac{1}{(1-P_m^{t_m})^n}$  (see Supplementary Information §4). Crucially, the initial density of the mutant  
 532 depends on the probability of successful invasion of the mutant  $P_m^{t_m}$  obtained above.

533 Provided we use (1) with the appropriate initial conditions as previously, the birth rates of both  
 534 the wild-type and mutant strains are approximately deterministic, and from [25], we have:

$$\mathbb{P}\{I_i^n(t) > 0\} \approx \mathbb{P}\{\tilde{I}_i(t) > 0\} = 1 - (1 - U_i^{t_m}(t))^{I_i^n(t_m)}, \quad (28)$$

535 where

$$U_i^{t_m}(t) = \frac{1}{1 + \int_{t_m}^t d_i e^{-\int_{t_m}^u b_i(s) - d_i ds} du} \quad (29)$$

536 is the probability that an individual infected with strain  $i$  ( $i = m, w$ ) present at  $t_m$  has descendants  
 537 alive at time  $t$ . Under the branching assumption, the lines of descent of distinct infected individuals  
 538 are independent, hence the probability that strain  $i$  vanishes by time  $t$  is the product of the  
 539 probabilities that each line of descent vanishes,  $(1 - U_i^{t_m}(t))^{I_i^n(t_m)}$ .

In practice, we need two pairs of auxiliary equations to track the probability of extinction of both the wild type and the mutant

$$\dot{U}_w^{t_m} = -d_w U_w^{t_m} V_w^{t_m} \quad (30)$$

$$\dot{V}_w^{t_m} = (d_w - b_w(t)) V_w^{t_m} - d_w (V_w^{t_m})^2 \quad (31)$$

$$\dot{U}_m^{t_m} = -d_m U_m^{t_m} V_m^{t_m} \quad (32)$$

$$\dot{V}_m^{t_m} = (d_m - b_m(t)) V_m^{t_m} - d_m (V_m^{t_m})^2, \quad (33)$$

540 with  $U_w^{t_m}(t_m) = V_w^{t_m}(t_m) = U_m^{t_m}(t_m) = V_m^{t_m}(t_m) = 1$ . To compute the probability of fixation, we  
 541 first consider the probability of fixation prior to time  $t$ , which is derived in exactly the same manner  
 542 as (27).

$$U^{t_m}(t) = \int_{t_m}^t \mathbb{P}\{I_m^n(s) > 0\} \frac{d}{dt} \mathbb{P}\{I_w^n(s) = 0\} ds,$$

543 Using (28) to approximate the probabilities  $\mathbb{P}\{I_m^n(s) > 0\}$  and  $\mathbb{P}\{I_w^n(s) = 0\}$ , we get

$$U^{t_m}(t) = \int_{t_m}^t [1 - (1 - U_m^{t_m}(s))^{I_m^n(t_m)}][I_w^n(t_m)(-\dot{U}_w^{t_m})(1 - U_w^{t_m}(s))^{I_w^n(t_m)-1}]ds.$$

544 Differentiating this and taking  $I_w^n(t_m) = nI_w(t_m)$  and  $I_m^n(t_m) = 1$  yields the following auxiliary  
545 equation for  $U^{t_m}(t)$ :

$$\dot{U}^{t_m} = nI_w(t_m)(\delta + \alpha_w + \gamma_w)U_w^{t_m}V_w^{t_m}(1 - U_w^{t_m})^{nI_w(t_m)-1}U_m^{t_m}, \quad (34)$$

546 with initial condition  $U^{t_m}(t_m) = 0$ . We estimate the fixation probability as  $P_{fix}^{t_m} = U^{t_m}(\infty)$  as  
547 above.

## 548 5.5 Invasion and Fixation with Standing Variation

549 We now come back to the probability of adaptation from standing variation at time  $t = 0$ , using the  
550 probability  $p_k$  that there are  $k$  mutants present at time  $t = 0$  and the estimates for the probabilities  
551 of invasion and fixation  $P_m^{t_m}$  and  $P_{fix}^{t_m}$ , of a single mutant arriving at time  $t_m$ , taking  $t_m = 0$ . Recall  
552 that  $p_k$  is negative binomial with success probability  $R_m^0 = b_m^0/d_m$  and  $r = \mu_m/b_m^0$  failures. Under  
553 the branching process approximation, the chain of infections started by each mutation will go  
554 extinct independently with probability  $1 - P_m^0$ . The probability of invasion is then the probability  
555 that at least one line survives,  $1 - (1 - P_m^0)^k$ . Summing this over all possible values of  $k$  gives us  
556 the invasion probability from standing variation,

$$\sum_{k=1}^{\infty} p_k (1 - (1 - P_m^0)^k) = 1 - p_0 - \sum_{k=1}^{\infty} p_k (1 - P_m^0)^k = 1 - \sum_{k=0}^{\infty} p_k (1 - P_m^0)^k.$$

557 Recalling that the probability generating function for the number of mutants at time  $t = 0$  is

$$\sum_{k=0}^{\infty} p_k z^k = \left( \frac{1 - R_m^0}{1 - R_m^0 z} \right)^r,$$

558 which converges provided  $|z| < \frac{1}{R_m^0}$ , we see that the probability of invasion from standing variation  
559 is  $1 - \left( \frac{1 - R_m^0}{1 - R_m^0(1 - P_m^0)} \right)^r$ .

Similarly, if there are  $k$  mutations at time  $t = 0$ , (28) gives us that  $\mathbb{P}\{I_m^n(t) > 0 | I_m(0) = k\} \approx 1 - (1 - U_m^0(t))^k$ , so proceeding as above, we find that the probability that the mutant is still present at time  $t$ , assuming that at least one individual was present at time  $t = 0$  is approximately  $1 - \left(\frac{1 - R_m^0}{1 - R_m^0(1 - U_m^0(t))}\right)^r$ . Substituting this for  $\mathbb{P}\{I_m^n(t) > 0\}$  in (27) and differentiating as above gives us an auxiliary equation analogous to (34) for  $U^0(t)$ , the probability that the mutant fixes starting from standing variation:

$$\begin{aligned}\dot{U}^0 &= \mathbb{P}\{I_m^n(s) > 0\} \frac{d}{dt} \mathbb{P}\{I_w^n(s) = 0\} \\ &= nI_w(0)(\delta + \alpha_w + \gamma_w)U_w^0V_w^0(1 - U_w^0)^{nI_w(0)-1} \left(1 - \left(\frac{1 - R_m^0}{1 - R_m^0(1 - U_m^0)}\right)^r\right).\end{aligned}$$

560 As previously, we obtain  $P_{fix}^0 = \dot{U}^0(\infty)$  by choosing  $t$  sufficiently large that  $\dot{U}^0(t)$  equilibrates.

## 561 5.6 Stochastic simulations

562 We carried out stochastic simulations to check the validity of our results. We developed an  
563 individual-based simulation program for the Markov process described in **Table S1**. In order  
564 to match the assumption used in our analysis we start the simulation when the system is at its  
565 endemic equilibrium before vaccination given by equation (11) in section 5.1. Then we introduce  
566 a single host infected with the mutant pathogen at a time  $t_m$  after the start of vaccination and  
567 we let the simulation run until one of the pathogen variants (the wild-type or the mutant) goes  
568 extinct. If the wild-type goes extinct first we record this run as a “mutant fixation event”. We ran  
569 1000 replicates for each set of parameters and we plot the proportion of runs that led to mutant  
570 fixation in **Figure 5**. We also used our simulations to confirm our prediction on the speed of viral  
571 adaptation (**Figure 6**). In this scenario we allowed the vaccine-escape variant to be introduced by  
572 mutation from the wild-type genotype as detailed in section 5.1. We carried out 1000 simulations  
573 and monitored (i) the frequency of the escape mutant at different points in time after the start of  
574 vaccination (**Figure 6A**) (ii) the number of introduction events by mutation and (**Figure 6B**).

575

576 We also used this simulation approach to go beyond the scenarios used in our analysis to check

577 the robustness of some of our results. We developed a modified version of our simulation approach  
578 to relax two simplifying assumptions used throughout our analysis: (i) vaccination starts when the  
579 epidemiology has reached an endemic equilibrium, (ii) naturally immune host are fully protected  
580 against reinfection.

581 • **The timing of the start of vaccination:** We used a modified version of our simulation code  
582 to explore the robustness of our results when vaccination starts sooner and the wild-type pathogen  
583 has not reached its endemic equilibrium. In practice, we start the simulation with  $n$  hosts where a  
584 fraction  $f = 0.1\%, 1\%$  or  $10\%$  is infected by the wild-type (i.e.  $I_w^n(0) = fn$  and  $S^n(0) = (1 - f)n$ ).  
585 Vaccination rollout is assumed to start at time  $t = 0$ . We introduce an infected host with a  
586 mutant pathogen at time  $t_m$  and we monitor its dynamics to obtain the probability of invasion  
587 from 1000 independent replicates. Starting vaccination when the incidence is low tends to increase  
588 the probability of invasion of the escape mutant because it is less likely to go extinct when the  
589 density of susceptible hosts is more abundant (**Figure S5**). Note, however, that this effect is  
590 maximised when the mutant is introduced soon after the start of vaccination (i.e. low values of  
591  $t_m$ ). Indeed, for the parameter values we used, the endemic equilibrium is reached very fast and  
592 the predictions of the probability of invasion computed when vaccination starts at the endemic  
593 equilibrium remain relatively good.

594 • **Efficacy of natural immunity against reinfections:** We used a modifier version of our  
595 simulation code to explore the robustness of our results when naturally immune hosts are not  
596 perfectly protected. In this scenario we assume that recovered hosts can be reinfected by strain  
597  $i$  at a rate  $\rho\epsilon_i\frac{I_i}{N}$ . In this scenario, it is still possible to aggregate the density of different types of  
598 hosts infected by the same strain  $i$ ,  $I_i := I_{U_i} + I_{V_i} + I_{R_i}$ , which modifies the effective per-generation  
599 reproduction ratio:

$$R_i^e = R_i \left( \frac{S_U}{N} + \epsilon_i \frac{S_V}{N} + \rho\epsilon_i \frac{R}{N} \right)$$

600 Hence, higher values of  $\rho$  give an extra advantage to the escape mutant because it increases the  
601 fraction of imperfectly immune hosts. This new expression of the effective per-generation reproduc-  
602 tion ratio can be used to derive a good approximation of the probability of mutant invasion using  
603 (9). This approximation fully captures how higher values of  $\rho$  increase the probability of invasion

604 of escape mutations (**Figure S6**). Interestingly, when  $\rho$  is large, the probability of invasion is less  
605 sensitive to the time at which the escape mutant is introduced because, whatever the time after  
606 the start of vaccination, the fraction of imperfectly immune host is large.

607

608 The simulation code is available upon request and will be deposited on zenodo after acceptance of  
609 the manuscript.

610

611 **Acknowledgements:** SG acknowledges support from the CNRS PEPS 2022 grant “VaxDurable”.

## 612 References

613 [1] Helen K Alexander and Sebastian Bonhoeffer. Pre-existence and emergence of drug resistance  
614 in a generalized model of intra-host viral dynamics. *Epidemics*, 4(4):187–202, 2012.

615 [2] Helen K Alexander, Guillaume Martin, Oliver Y Martin, and Sebastian Bonhoeffer. Evo-  
616 lutionary rescue: linking theory for conservation and medicine. *Evolutionary applications*,  
617 7(10):1161–1179, 2014.

618 [3] H. Andersson and T. Britton. *Stochastic Epidemic Models and their Statistical Analysis*,  
619 volume 151 of *Lecture notes in statistics*. Springer, New York, 2000.

620 [4] Graham Bell. Evolutionary rescue. *Annual Review of Ecology, Evolution, and Systematics*,  
621 48:605–627, 2017.

622 [5] Yuhua Cai and Stefan A. H. Geritz. Resident-invader dynamics of similar strategies in fluctu-  
623 ating environments. 2020.

624 [6] Philippe Carmona and Sylvain Gandon. Winter is coming: Pathogen emergence in seasonal  
625 environments. *PLoS computational biology*, 16(7):e1007954, 2020.

626 [7] Hélène Chabas, Sébastien Lion, Antoine Nicot, Sean Meaden, Stineke van Houte, Sylvain  
627 Moineau, Lindi M Wahl, Edze R Westra, and Sylvain Gandon. Evolutionary emergence of  
628 infectious diseases in heterogeneous host populations. *PLoS biology*, 16(9):e2006738, 2018.

- 629 [8] Sarah Cobey, Daniel B Larremore, Yonatan H Grad, and Marc Lipsitch. Concerns about  
630 sars-cov-2 evolution should not hold back efforts to expand vaccination. *Nature Reviews Im-*  
631 *munology*, pages 1–6, 2021.
- 632 [9] Nicholas G Davies, Sam Abbott, Rosanna C Barnard, Christopher I Jarvis, Adam J Kucharski,  
633 James D Munday, Carl AB Pearson, Timothy W Russell, Damien C Tully, Alex D Washburne,  
634 et al. Estimated transmissibility and impact of sars-cov-2 lineage b. 1.1. 7 in england. *Science*,  
635 372(6538), 2021.
- 636 [10] Troy Day, David A Kennedy, Andrew F Read, and Sylvain Gandon. Pathogen evolution during  
637 vaccination campaigns. *PLoS Biology*, 20(9):e3001804, 2022.
- 638 [11] Troy Day and Andrew F Read. Does high-dose antimicrobial chemotherapy prevent the evo-  
639 lution of resistance? *PLoS computational biology*, 12(1):e1004689, 2016.
- 640 [12] Saad-Roy et al. Epidemiological and evolutionary considerations of sars-cov-2 vaccine dosing  
641 regimes. *medRxiv*, 2020.
- 642 [13] S. Gandon and T. Day. The evolutionary epidemiology of vaccination. *J. Royal Soc. Interface*,  
643 4(16):803–817, 2007.
- 644 [14] Sylvain Gandon and Troy Day. Evidences of parasite evolution after vaccination. *Vaccine*,  
645 26:C4–C7, 2008.
- 646 [15] Sylvain Gandon and Sébastien Lion. Targeted vaccination and the speed of sars-cov-2 adap-  
647 tation. *medRxiv*, 2021.
- 648 [16] Sylvain Gandon, Margaret Mackinnon, Sean Nee, and Andrew Read. Imperfect vaccination:  
649 some epidemiological and evolutionary consequences. *Proceedings of the Royal Society of Lon-*  
650 *don. Series B: Biological Sciences*, 270(1520):1129–1136, 2003.
- 651 [17] S. A. H. Geritz. Resident-invader dynamics and the coexistence of similar strategies. *J. Math.*  
652 *Biol.*, 50(1):67–82, 2005.

- 653 [18] Philip J Gerrish, Fernando Saldana, Benjamin Galeota-Sprung, Alexandre Colato, Erika E  
654 Rodriguez, and Jorge X Velasco-Hernandez. How unequal vaccine distribution promotes the  
655 evolution of vaccine escape. *Available at SSRN 3827009*, 2021.
- 656 [19] Bryan Grenfell, Nicole Mideo, Laura C Pollitt, Andrew F Read, David L Smith, Claire Stan-  
657 dley, Nina Wale, Geoffrey Chi-Johnston, Ted Cohen, Troy Day, et al. The path of least  
658 resistance: aggressive or moderate. 2014.
- 659 [20] Bryan T Grenfell, Oliver G Pybus, Julia R Gog, James LN Wood, Janet M Daly, Jenny A  
660 Mumford, and Edward C Holmes. Unifying the epidemiological and evolutionary dynamics of  
661 pathogens. *science*, 303(5656):327–332, 2004.
- 662 [21] Matthew Hartfield and Samuel Alizon. Within-host stochastic emergence dynamics of immune-  
663 escape mutants. *PLoS computational biology*, 11(3):e1004149, 2015.
- 664 [22] Jan Humplik, Alison L Hill, and Martin A Nowak. Evolutionary dynamics of infectious diseases  
665 in finite populations. *Journal of theoretical biology*, 360:149–162, 2014.
- 666 [23] P. Jagers. Stabilities and instabilities in population dynamics. *J. Appl. Prob.*, pages 770–780,  
667 1992.
- 668 [24] S. Karlin and J. McGregor. Linear growth, birth and death processes. *J. Math. & Mech.*,  
669 7(4):643–662, 1958.
- 670 [25] D. G. Kendall. On the generalized “Birth-and-Death” process. *Ann. Math. Stat.*, 19(1):1–15,  
671 1948.
- 672 [26] David A Kennedy and Andrew F Read. Why does drug resistance readily evolve but vaccine re-  
673 sistance does not? *Proceedings of the Royal Society B: Biological Sciences*, 284(1851):20162562,  
674 2017.
- 675 [27] David A Kennedy and Andrew F Read. Why the evolution of vaccine resistance is less of a  
676 concern than the evolution of drug resistance. *Proceedings of the National Academy of Sciences*,  
677 115(51):12878–12886, 2018.



- 678 [28] John Frank Charles Kingman. *Poisson processes*, volume 3. Clarendon Press, 1992.
- 679 [29] Oleg Kogan, Michael Khasin, Baruch Meerson, David Schneider, and Christopher R My-  
680 ers. Two-strain competition in quasineutral stochastic disease dynamics. *Physical Review E*,  
681 90(4):042149, 2014.
- 682 [30] T. G. Kurtz. *Approximation of Population Processes*, volume 36. Society for Industrial and  
683 Applied Mathematics, Philadelphia, 1981.
- 684 [31] Gabriela Lobinska, Ady Pauzner, Arne Traulsen, Yitzhak Pilpel, and Martin A Nowak. Evo-  
685 lution of resistance to covid-19 vaccination with dynamic social distancing. *Nature human*  
686 *behaviour*, 6(2):193–206, 2022.
- 687 [32] Guillaume Martin, Robin Aguilée, Johan Ramsayer, Oliver Kaltz, and Ophélie Ronce. The  
688 probability of evolutionary rescue: towards a quantitative comparison between theory and  
689 evolution experiments. *Philosophical Transactions of the Royal Society B: Biological Sciences*,  
690 368(1610):20120088, 2013.
- 691 [33] Hamish McCallum, Nigel Barlow, and Jim Hone. How should pathogen transmission be mod-  
692 elled? *Trends in ecology & evolution*, 16(6):295–300, 2001.
- 693 [34] AngelaR McLean. After the honeymoon in measles control. *The Lancet*, 345(8945):272, 1995.
- 694 [35] David V McLeod, Lindi M Wahl, and Nicole Mideo. Mosaic vaccination: how distributing  
695 different vaccines across a population could improve epidemic control. *bioRxiv*, pages 2020–11,  
696 2021.
- 697 [36] T. L. Parsons, A. Lambert, T. Day, and S. Gandon. Pathogen evolution in finite populations:  
698 slow and steady spreads the best. *J. Royal Soc. Interface*, 15(147), 2018.
- 699 [37] Robert S Paton, Christopher E Overton, and Thomas Ward. The rapid replacement of the  
700 delta variant by omicron (b. 1.1. 529) in england. *Sci. Transl. Med.*, page eabo5395, 2022.
- 701 [38] Tadeas Priklopil and Laurent Lehmann. Invasion implies substitution in ecological communities  
702 with class-structured populations. 134:36–52, 2020.

- 703 [39] Jason W Rausch, Adam A Capoferri, Mary Grace Katusiime, Sean C Patro, and Mary F  
704 Kearney. Low genetic diversity may be an achilles heel of sars-cov-2. *Proceedings of the*  
705 *National Academy of Sciences*, 117(40):24614–24616, 2020.
- 706 [40] Andrew F Read, Troy Day, and Silvie Huijben. The evolution of drug resistance and the curi-  
707 ous orthodoxy of aggressive chemotherapy. *Proceedings of the National Academy of Sciences*,  
708 108(Supplement 2):10871–10877, 2011.
- 709 [41] Simon A Rella, Yuliya A Kulikova, Emmanouil T Dermitzakis, and Fyodor A Kondrashov.  
710 Rates of sars-cov-2 transmission and vaccination impact the fate of vaccine-resistant strains.  
711 *Scientific Reports*, 11(1):1–10, 2021.
- 712 [42] Olivier Restif and Bryan T Grenfell. Vaccination and the dynamics of immune evasion. *Journal*  
713 *of the Royal Society Interface*, 4(12):143–153, 2007.
- 714 [43] Rafael Sanjuán, Miguel R Nebot, Nicola Chirico, Louis M Mansky, and Robert Belshaw. Viral  
715 mutation rates. *Journal of virology*, 84(19):9733–9748, 2010.
- 716 [44] Robin N Thompson, Edward M Hill, and Julia R Gog. Sars-cov-2 incidence and vaccine escape.  
717 *The Lancet Infectious Diseases*, 2021.
- 718 [45] Stineke van Houte, Alice KE Ekroth, Jenny M Broniewski, H el ene Chabas, Ben Ashby, Joseph  
719 Bondy-Denomy, Sylvain Gandon, Mike Boots, Steve Paterson, Angus Buckling, et al. The  
720 diversity-generating benefits of a prokaryotic adaptive immune system. *Nature*, 532(7599):385–  
721 388, 2016.
- 722 [46] Erik Volz, Swapnil Mishra, Meera Chand, Jeffrey C Barrett, Robert Johnson, Lily Geidelberg,  
723 Wes R Hinsley, Daniel J Laydon, Gavin Dabrera,  Aine O’Toole, et al. Assessing transmissibility  
724 of sars-cov-2 lineage b. 1.1. 7 in england. *Nature*, 593(7858):266–269, 2021.
- 725 [47] Pengfei Wang, Manoj S Nair, Lihong Liu, Sho Iketani, Yang Luo, Yicheng Guo, Maple Wang,  
726 Jian Yu, Baoshan Zhang, Peter D Kwong, et al. Antibody resistance of sars-cov-2 variants b.  
727 1.351 and b. 1.1. 7. *Nature*, pages 1–6, 2021.

**Table 1:** Parameters and dynamical variables of the model

| Symbol       | Description                                                                            | Default value                       |
|--------------|----------------------------------------------------------------------------------------|-------------------------------------|
| Parameters   |                                                                                        |                                     |
| $\lambda$    | influx rate of susceptible hosts                                                       | $3 \cdot 10^{-4} \text{ week}^{-1}$ |
| $\delta$     | natural death rate of hosts                                                            | $3 \cdot 10^{-4} \text{ week}^{-1}$ |
| $\omega_R$   | rate of waning immunity of naturally immune hosts                                      | $0.05 \text{ week}^{-1}$            |
| $\omega_V$   | rate of waning immunity of vaccinated hosts                                            | $0.05 \text{ week}^{-1}$            |
| $p$          | probability of vaccination of newborns                                                 | 0                                   |
| $\nu$        | rate of vaccination rollout                                                            | variable                            |
| $\theta_U$   | rate of mutation (from $w$ to $m$ ) in unvaccinated hosts                              | variable                            |
| $\theta_V$   | rate viral mutation (from $w$ to $m$ ) in vaccinated hosts                             | variable                            |
| $n$          | system size (scaling parameter allowing us to manipulate the pathogen population size) | variable                            |
| $\alpha_w$   | virulence (increased mortality rate) by strain $w$                                     | $0.02 \text{ week}^{-1}$            |
| $\beta_w$    | rate of transmission of viral strain $w$                                               | $10 \text{ week}^{-1}$              |
| $\gamma_w$   | recovery rate of the host infected by strain $w$                                       | $2 \text{ week}^{-1}$               |
| $\epsilon_w$ | probability of infection of vaccinated hosts by strain $w$                             | 0.05                                |
| $\alpha_m$   | virulence (increased mortality rate) by strain $m$                                     | <i>variable</i>                     |
| $\beta_m$    | rate of transmission of viral strain $w$                                               | <i>variable</i>                     |
| $\gamma_m$   | recovery rate of the host infected by strain $m$                                       | $2 \text{ week}^{-1}$               |
| $\epsilon_m$ | probability of infection of vaccinated hosts by strain $m$                             | 1                                   |
| Variables    |                                                                                        |                                     |
| $S_U$        | density of unvaccinated susceptible hosts                                              |                                     |
| $S_V$        | density of vaccinated susceptible hosts                                                |                                     |
| $R$          | density of naturally immune hosts                                                      |                                     |
| $I_{Ui}$     | density of unvaccinated hosts infected by strain $i \in (w, m)$                        |                                     |
| $I_{Vi}$     | density of vaccinated hosts infected by strain $i \in (w, m)$                          |                                     |

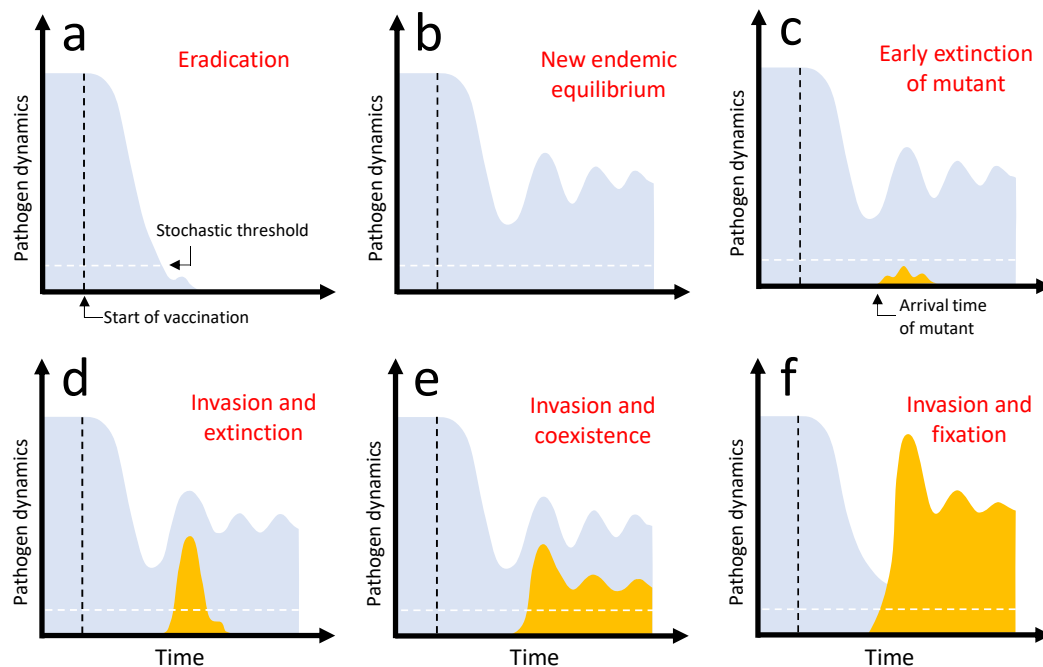

**Figure 1: Graphical representation of the different evolutionary epidemiology outcomes after vaccination.** The density of the wild-type pathogen is indicated in light blue and the dynamics of the mutant in orange. Each panel describes the temporal dynamics of the epidemics after the start of vaccination: (a) eradication of the wild-type pathogen, (b) new endemic equilibrium of the wild-type population after damped oscillations (with no introduction of the vaccine-escape mutant), (c) early extinction of the vaccine-escape mutant after its introduction by mutation, (d) invasion of the vaccine-escape mutant followed by its extinction, (e) invasion of the vaccine-escape mutant and long-term coexistence with the wild type in a new endemic equilibrium after damped oscillations, (f) invasion and fixation of the vaccine-escape mutant (extinction of the wild type). The vertical dashed line (black) indicates the start of vaccination. For simplicity we consider that vaccination starts after the wild-type population has reached an endemic equilibrium. The horizontal dashed line indicates the “stochastic threshold” above which one may consider that the deterministic model provides a very good approximation of the dynamics and we can neglect the effect of demographic stochasticity. *Invasion* occurs when the vaccine-escape variant manages to go beyond the “stochastic threshold” (panels d, e and f). *Adaptation* occurs when the vaccine-escape variant is maintained in the population (panels e and f). *Fixation* occurs when the vaccine-escape variant manages to outcompete the wild type (panel f).

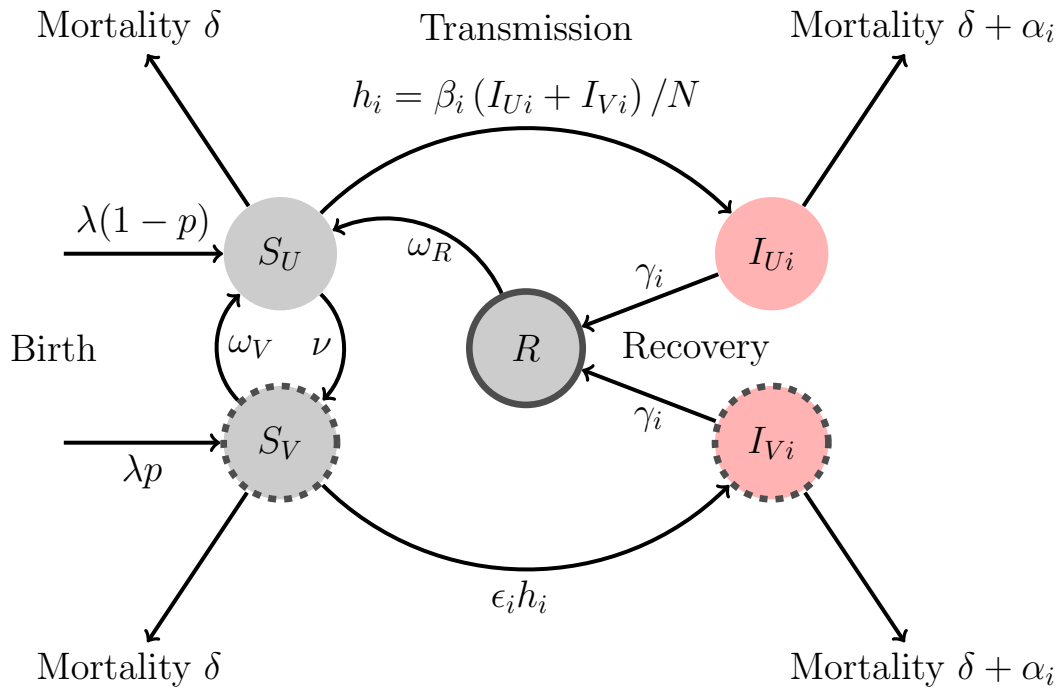

**Figure 2: A schematic representation of the model.** Naive and uninfected hosts ( $S_U$  hosts) are introduced at a rate  $\lambda$  and are vaccinated with probability  $p$  at birth and at rate  $\nu$  later on. Immunization induced by the vaccine wanes at rate  $\omega_V$ . Uninfected hosts ( $S_U$  and  $S_V$ ) die at a rate  $\delta$  while infected hosts ( $I_{U_i}$  and  $I_{V_i}$ ) die at a rate  $d_i = \delta + \alpha_i$ , where  $i$  refers to the virus genotype: the wild-type ( $i = w$ ) or the vaccine-escape mutant ( $i = m$ ). The rate of infection of naive hosts by the genotype  $i$  is  $h_i = \beta_i(I_{U_i} + I_{V_i})/N$ , where  $\beta_i$  is the transmission rate of the genotype  $i$ . Vaccination reduces the force of infection and  $\epsilon_i$  refers to the ability of the genotype  $i$  to escape the immunity triggered by vaccination (we assume  $\epsilon_m > \epsilon_w$ ). A host infected by parasite genotype  $i$  recovers from the infection at rate  $\gamma_i$  and yields naturally immune hosts ( $R$  hosts) that cannot be reinfected by both the wild-type and the escape mutant. Natural immunity is assumed to wane at rate  $\omega_R$ . The total host population density is  $N = S_U + S_V + \sum_i(I_{U_i} + I_{V_i}) + R$ .

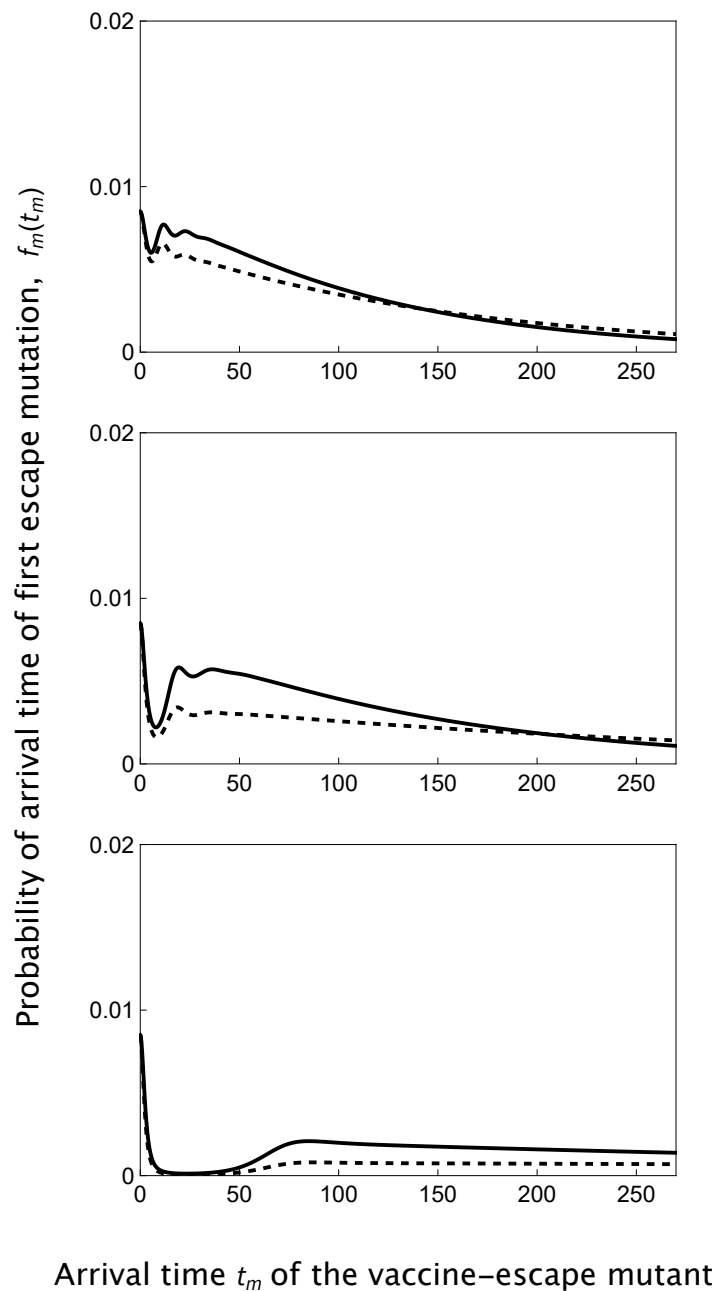

**Figure 3: Faster vaccine rollout delays the arrival time of the first escape mutant.** We plot the probability density function  $f_m(t)$  of the arrival time of the first escape mutant for different speeds of vaccination rollout:  $\nu = 0.05$  (top),  $0.15$  (middle) and  $0.24$  (bottom). We contrast a scenario where  $\theta_V = \theta_U$  (dashed line), and  $\theta_V = 10 \times \theta_U$  (full line). Other parameter values:  $\theta_U = 1$ ,  $\lambda = \delta = 3 \cdot 10^{-4}$ ,  $\omega_V = \omega_R = 0.05$ ,  $p = 0$ ,  $\alpha_w = 0.02$ ,  $\beta_w = 10$ ,  $\gamma_w = 2$ ,  $\epsilon_w = 0.05$ ,  $R_w = 4.95$ . For these parameter values the critical rate of vaccination  $\nu_c$  above which the wild-type pathogen is driven to extinction is  $\nu_c \approx 0.264$  (see equation (5)).

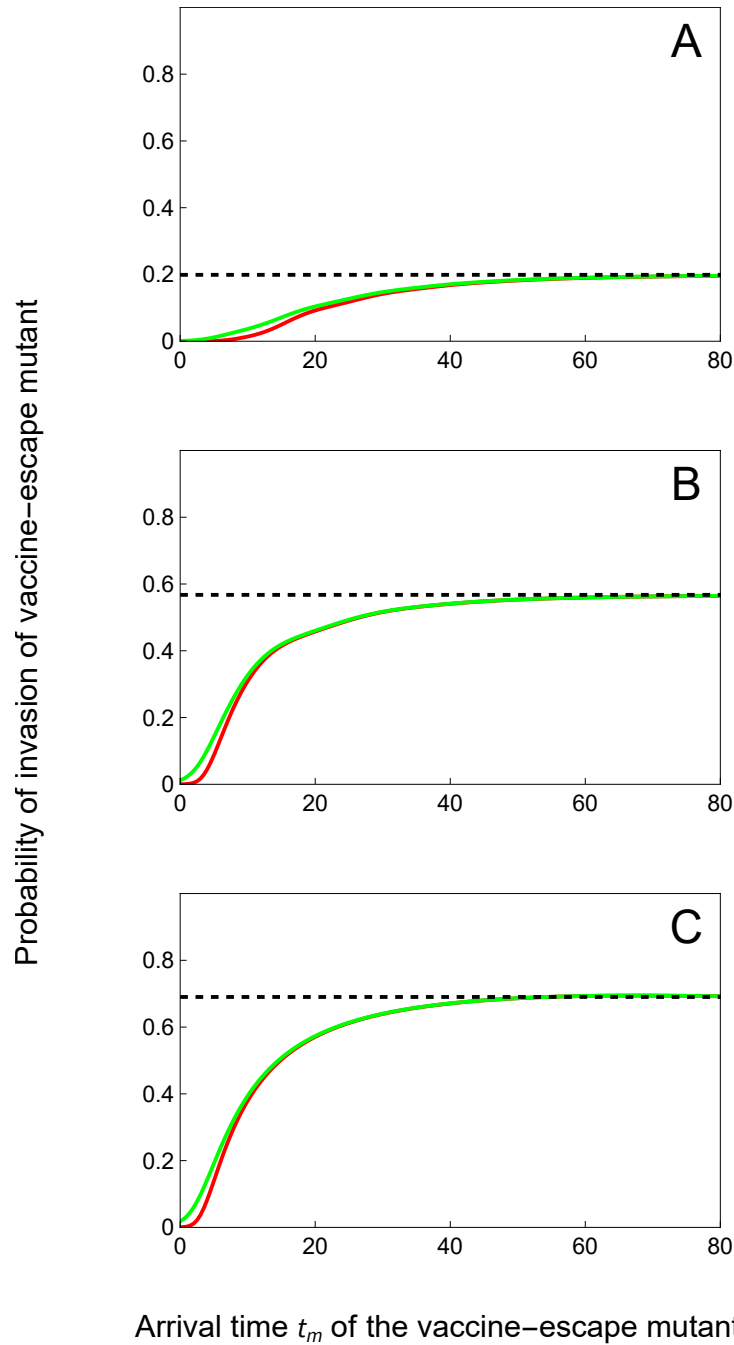

**Figure 4: Probability of invasion of the vaccine-escape mutant increases with  $t_m$ .** We plot the probability invasion  $P_m^{t_m}$  of a *slow* (green) and a *fast* (red) vaccine-escape mutant for different speeds of vaccination rollout:  $\nu = 0.05$  (top),  $0.15$  (middle) and  $0.24$  (bottom). The *slow* mutant:  $\alpha_m = 0.02, \beta_m = 7, \gamma_m = 2, \epsilon_m = 1, R_m = 3.46$ . The *fast* mutant:  $\alpha_m = 4.0606, \beta_m = 21, \gamma_m = 2, \epsilon_m = 1, R_m = 3.46$ . The probability of invasion  $P_m^*$  in the limit  $t_m \rightarrow \infty$  (see equation (9)) is indicated with the dashed black line. Other parameter values as in **Figure 3**:  $\lambda = \delta = 3 \cdot 10^{-4}$ ,  $\omega_V = \omega_R = 0.05$ ,  $p = 0$ ,  $\alpha_w = 0.02$ ,  $\beta_w = 10$ ,  $\gamma_w = 2$ ,  $\epsilon_w = 0.05$ ,  $R_w = 4.95$ .

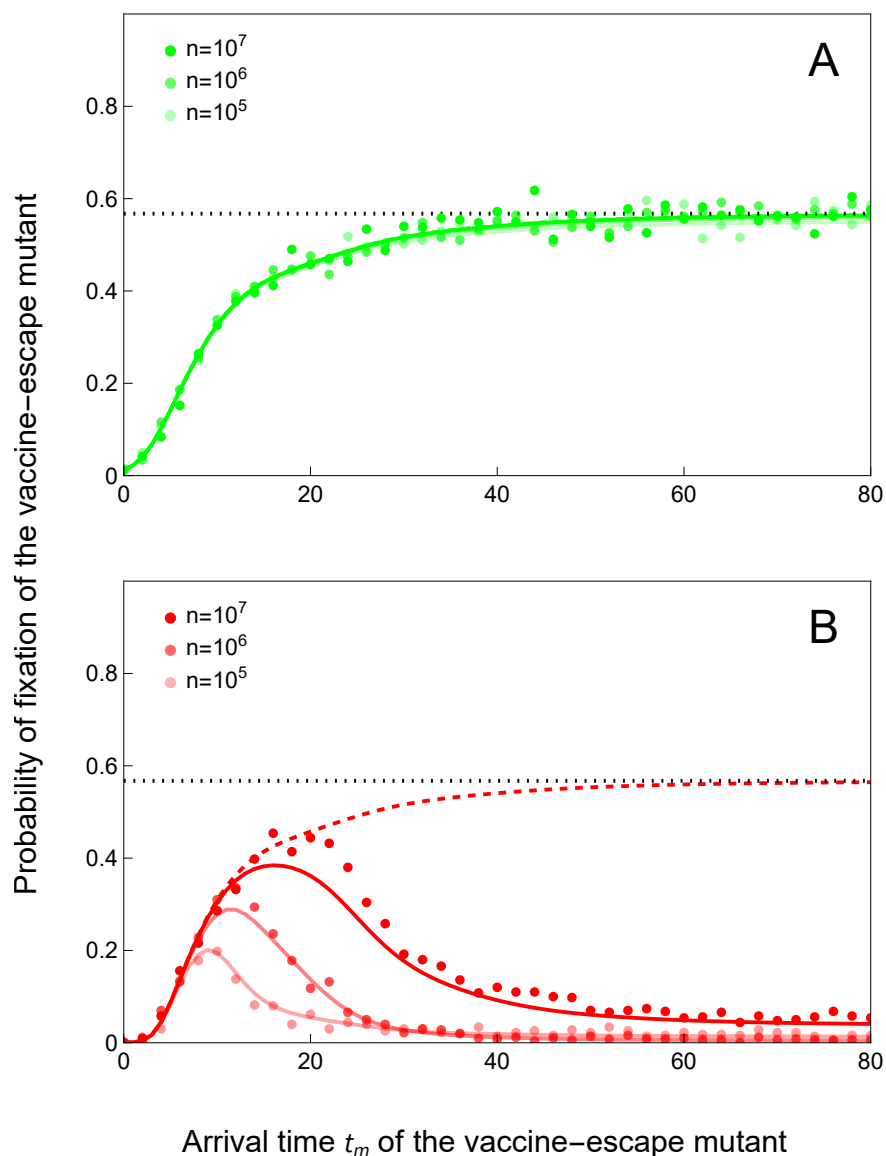

**Figure 5: Probability of fixation of the vaccine-escape mutant may be low when  $t_m$  is large.** We plot the probability of fixation of (A) a *slow* (green) and (B) a *fast* (red) vaccine-escape mutant for an intermediate speed of vaccination rollout:  $\nu = 0.15$ . The *slow* mutant:  $\alpha_m = 0.02$ ,  $\beta_m = 7$ ,  $\gamma_m = 2$ ,  $\epsilon_m = 1$ ,  $R_m = 3.46$ . The *fast* mutant:  $\alpha_m = 4.0606$ ,  $\beta_m = 21$ ,  $\gamma_m = 2$ ,  $\epsilon_m = 1$ ,  $R_m = 3.46$ . The full colored lines give the probability of fixation  $P_{fix}^{t_m}$  computed numerically (see Methods section 5.4) and the dots give the results of individual-based simulations (see Methods section 5.6) for different values of  $n$  which affect the pathogen population size and the intensity of demographic stochasticity. We plot the probability of *invasion*  $P_m^{t_m}$  (see **Figure 4**) with dashed colored line and its asymptotic value  $P_m^*$  with a dotted black line. Other parameter values as in **Figure 3**:  $\lambda = \delta = 3 \cdot 10^{-4}$ ,  $\omega_V = \omega_R = 0.05$ ,  $p = 0$ ,  $\alpha_w = 0.02$ ,  $\beta_w = 10$ ,  $\gamma_w = 2$ ,  $\epsilon_w = 0.05$ ,  $R_w = 4.95$ .



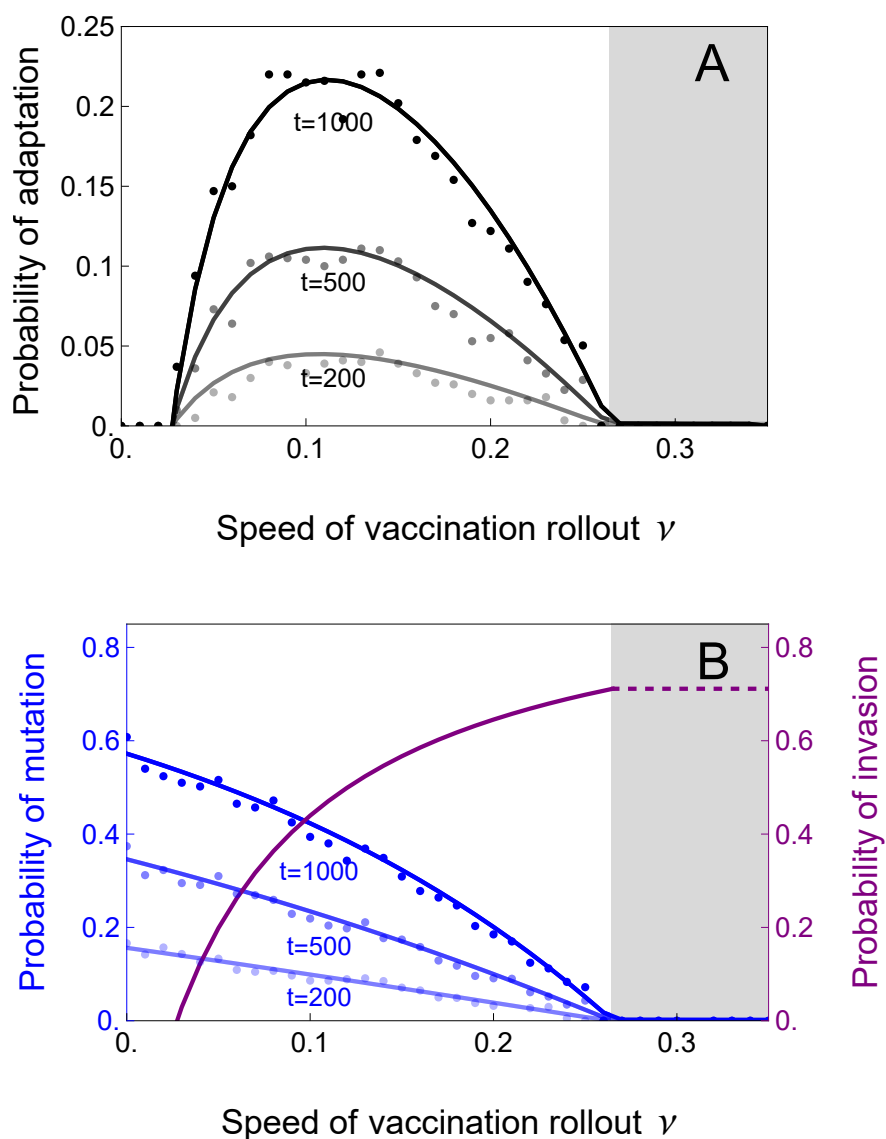

**Figure 6: The probability of adaptation is maximised for intermediate speed of vaccination rollout.** In (A) We plot the probability of adaptation  $A_m^t$  (black lines) against the speed of vaccination rollout at different points in time. In (B) we plot the probability  $M_m^t$  of the introduction of at least one mutant before different points in time  $t$  (blue lines) and the probability  $P_m^*$  (purple line) which gives a good approximation of the probability of successful invasion of an escape-mutant. The dashed purple line gives the probability of invasion of the escape-mutant in the absence of the wild type. The dots give the results of individual-based simulations (see Methods section 5.6). The vaccine-escape mutant is assumed to have the following phenotype (*slow* mutant in **Figure 4** and **5**):  $\alpha_m = 0.02, \beta_m = 7, \gamma_m = 2, \epsilon_m = 1, R_m = 3.46$ . Other parameter values:  $\lambda = \delta = 3 \cdot 10^{-4}, n = 10^6, \omega_V = \omega_R = 0.05, p = 0, \alpha_w = 0.02, \beta_w = 10, \gamma_w = 2, \epsilon_w = 0.05, R_w = 4.95$ . The light gray area on the right-hand-side indicates the speed above which the wild-type pathogen is expected to be driven to extinction ( $\nu > \nu_c \approx 0.264$ , see equation (5)).
