# The speed of vaccination rollout and the risk of pathogen adaptation

Sylvain Gandon<sup>1,\*</sup>, Troy Day<sup>2,3</sup>, and Amaury Lambert<sup>4,5</sup>

<sup>1</sup>CEFE, CNRS, Univ Montpellier, EPHE, IRD, Montpellier, France

\*Corresponding author

<sup>4</sup>Institut de Biologie de l'ENS (IBENS), École Normale Supérieure (ENS), CNRS UMR 8197, Paris, France

<sup>5</sup>Center for Interdisciplinary Research in Biology (CIRB), Collège de France, CNRS UMR 7241, INSERM U1050, PSL Research University, Paris, France

<sup>2</sup>Department of Mathematics and Statistics, Queen's University, Kingston, Canada

<sup>3</sup>Department of Biology, Queen's University, Kingston, Canada

Sunday 31<sup>st</sup> July, 2022

E-mails: SG - [sylvain.gandon@cefe.cnrs.fr](mailto:sylvain.gandon@cefe.cnrs.fr); TD - [tday@mast.queensu.ca](mailto:tday@mast.queensu.ca); AL - [amaury.lambert@ens.fr](mailto:amaury.lambert@ens.fr).

Keywords: evolutionary epidemiology, vaccination, life-history evolution, demographic stochasticity, virulence, adaptive dynamics

## Abstract

Vaccination is expected to reduce disease prevalence and to halt the spread of epidemics. But pathogen adaptation may erode the efficacy of vaccination and challenge our ability to control disease spread. Here we examine the influence of the speed of vaccination rollout on the overall risk of pathogen adaptation to vaccination. We extend the framework of evolutionary epidemiology theory to account for the different steps leading to adaptation to vaccines: (1) introduction of a vaccine-escape variant by mutation from the wild-type pathogen, (2) invasion of this vaccine-escape variant in spite of the risk of early extinction, (3) spread and, eventually, fixation of the vaccine-escape variant in the pathogen population. We show that the risk of pathogen adaptation is maximal for intermediate speed of vaccination rollout. On the one hand, slower rollout decreases pathogen adaptation because selection is too weak to avoid early extinction of the new variant. On the other hand, faster rollout decreases pathogen adaptation because it reduces the influx of adaptive mutations. Hence, vaccinating faster is recommended to decrease both the number of cases and the likelihood of pathogen adaptation. We also show that pathogen adaptation is driven by its basic reproduction ratio, the efficacy of the vaccine and the effects of the vaccine-escape mutations on pathogen life-history traits. Accounting for the interplay between epidemiology, selection and genetic drift, our work clarifies the influence of vaccination policies on different steps of pathogen adaptation and allows us to anticipate the effects of public-health interventions on pathogen evolution.

**Significance statement:** Pathogen adaptation to host immunity challenges the efficacy of vaccination against infectious diseases. Are there vaccination strategies that limit the emergence and the spread of vaccine-escape variants? Our theoretical model clarifies the interplay between the timing of vaccine escape mutation events and the transient epidemiological dynamics following the start of a vaccination campaign on pathogen adaptation. We show that the risk of adaptation is maximized for intermediate vaccination coverage but can be reduced by a combination of non pharmaceutical interventions and maximizing the speed of the vaccination rollout. These recommendations have important implications for the choice of vaccination strategies against the ongoing SARS-CoV-2 pandemic.

## 21 1 Introduction

22 Vaccination offers unique opportunities to protect a large fraction of the host population and  
23 thus to control spreading epidemics. In principle, large vaccination coverage can lead to pathogen  
24 eradication. In practice, however, the coverage required for eradication is often impossible to  
25 reach with imperfect vaccines [16, 34]. Moreover, pathogen adaptation may erode the efficacy of  
26 vaccination. Even if adaptation to vaccines is less common than adaptation to drugs [14, 25, 26]  
27 the spread of vaccine-escape mutations may challenge our ability to halt the spread of epidemics.

28 Understanding the dynamics of pathogen adaptation to vaccines is particularly relevant in the  
29 control of the ongoing SARS-CoV-2 pandemic. Yet, most theoretical studies that explore the  
30 evolution of pathogens after vaccination are based on the analysis of deterministic models and  
31 ignore the potential effects induced by the stochasticity of epidemiological dynamics. Demographic  
32 stochasticity, however, drives the intensity of genetic drift and can affect the establishment of new  
33 mutations and the long-term evolution of pathogens [41, 43, 40]. Several studies showed how the  
34 demographic stochasticity induced by finite host and pathogen population sizes alters selection on  
35 the life-history traits of pathogens [28, 22, 36]. These analytical predictions rely on the assumption  
36 that mutation rate is low, which allows us to decouple epidemiological and evolutionary time scales.  
37 Indeed, when mutation rate is low, the new strain is always introduced after the resident pathogen  
38 population has reached its endemic equilibrium. Many pathogens, however, have relatively large  
39 mutation rates [42] and the fate of a pathogen mutant introduced away from the endemic equilibrium  
40 is likely to be affected by the dynamics of the pathogen populations. Besides, the start of a  
41 vaccination campaign is expected to yield massive perturbations of the epidemiological dynamics  
42 and new mutations are likely to appear when the pathogen population is far from its endemic  
43 equilibrium.

44 The aim of the present study is to develop a versatile theoretical framework to evaluate the  
45 consequences of vaccination on the risk of pathogen adaptation to vaccination. There are six  
46 main evolutionary epidemiology outcomes after the start of vaccination which are summarized in  
47 **Figure 1**. Some of these outcomes are more favorable than others because they do not lead to  
48 the invasion of a new variant (**Figure 1a-c**). In contrast, vaccination may lead to the invasion of

49 vaccine-escape variants (**Figure 1e-f**). In the following we use a combination of deterministic and  
50 branching process approximations to study the joint epidemiological and evolutionary dynamics  
51 of the pathogen population. This analysis reveals the importance of the speed of the vaccination  
52 rollout as well as of the life-history characteristics of the vaccine-escape variants on the probability  
53 of pathogen adaptation.

## 54 2 Model

55 We use a classical SIR epidemiological model with demography, where hosts can either be suscepti-  
56 ble, infected or recovered [3]. The discrete number of each of these types of hosts is denoted by  $S^n$ ,  
57  $I^n$  and  $R^n$ , respectively. Because we are interested in the effect of demographic stochasticity the  
58 model is derived from a microscopic description of all the events that may occur in a finite—but not  
59 fixed—host population of (varying) total size  $N^n = S^n + I^n + R^n$ . We consider a continuous-time  
60 Markov process tracking the number of individuals of each type of host (see SI Section 1 for a  
61 detailed description). The susceptible hosts immigrate at rate  $\lambda n$ , where  $n$  is a “system size”, or  
62 scaling parameter, that indicates the order of magnitude of the arena in which the epidemic occurs.  
63 Hence the total host population varies stochastically in time, but remains of the order of  $n$ .

64 Vaccination may either take place with probability  $p$  when a new susceptible host enters the  
65 population (e.g., vaccination of newborns) or at a constant rate  $\nu$  for all other susceptible hosts  
66 (e.g., vaccination of adults). The immunity triggered by vaccination is assumed to wane at rate  
67  $\omega$ . A host may be unvaccinated,  $U$ , or vaccinated,  $V$ , and may either be uninfected or infected  
68 with the wild type,  $w$ , or a mutant strain,  $m$  (we assume coinfections are not possible). We thus  
69 have to track the numbers of two classes of susceptible hosts ( $S_U^n, S_V^n$ ) and four classes of infected  
70 individuals ( $I_{Uw}^n, I_{Um}^n, I_{Vw}^n, I_{Vm}^n$ ). We assume that the virulence  $\alpha_i$  (the mortality rate induced by  
71 the infection), the transmission  $\beta_i$  (the production rate of new infections), and the recovery  $\gamma_i$  (the  
72 rate at which the host clears the infection) are fully governed by the pathogen genotype ( $i = w$  or  
73  $m$ ). A fourth trait  $e_i \in [0, 1]$  governs the infectivity of pathogen genotype  $i$  on vaccinated hosts  
74 (infectivity of all genotypes is assumed to be equal to 1 on unvaccinated hosts). In other words, this  
75 final trait measures the ability of the pathogen to escape the immunity triggered by the vaccine.

76 For simplicity we assume that recovered hosts have lifelong immunity and thus reinfection is not  
 77 possible. We assume frequency-dependent transmission where the number of contacts a host may  
 78 have in the population is constant but a proportion of those contacts may be infectious. Note,  
 79 however, that other forms of transmission (e.g. density-dependent transmission [33]) are expected  
 80 to yield qualitatively similar results. We summarize the states of the process and the jump rates  
 81 at which individuals transition between states in **Table S1** and in **Figure 2**.

82 We use this model to examine the epidemiological and evolutionary dynamics following the  
 83 start of the vaccination campaign. In the following, for the sake of simplicity, we focus on scenarios  
 84 where we assume the pathogen population has reached an endemic equilibrium before the start of  
 85 vaccination (but we consider alternative scenarios in the Discussion).

## 86 3 Results

### 87 3.1 Deterministic Approximation

88 As a first step in our analysis, we use a deterministic approximation for large values of  $n$  [29] and  
 89 we work with host densities defined as  $S_i = S_i^n/n$ ,  $I_{ij} = I_{ij}^n/n$ ,  $N = N^n/n$ . This corresponds  
 90 to replacing discrete individuals by densities and interpreting the rates in **Figure 2** as describing  
 91 continuous flows rather than jumps. This yields a system of ordinary differential equations:

$$\begin{aligned}
 \dot{S}_U &= \lambda(1-p) + \omega S_V - \left( \beta_w \frac{I_{Uw} + I_{Vw}}{N} + \beta_m \frac{I_{Um} + I_{Vm}}{N} + \delta + \nu \right) S_U \\
 \dot{S}_V &= \lambda p + \nu S_U - \left( e_w \beta_w \frac{I_{Uw} + I_{Vw}}{N} + e_m \beta_m \frac{I_{Um} + I_{Vm}}{N} + \delta + \omega \right) S_V \\
 \dot{I}_{Uw} &= \beta_w (I_{Uw} + I_{Vw}) \frac{S_U}{N} - (\delta + \alpha_w + \gamma_w) I_{Uw} \\
 \dot{I}_{Um} &= \beta_m (I_{Um} + I_{Vm}) \frac{S_U}{N} - (\delta + \alpha_m + \gamma_m) I_{Um} \\
 \dot{I}_{Vw} &= e_w \beta_w (I_{Uw} + I_{Vw}) \frac{S_V}{N} - (\delta + \alpha_w + \gamma_w) I_{Vw} \\
 \dot{I}_{Vm} &= e_m \beta_m (I_{Um} + I_{Vm}) \frac{S_V}{N} - (\delta + \alpha_m + \gamma_m) I_{Vm} \\
 \dot{N} &= \lambda - \delta N - \alpha_w (I_{Uw} + I_{Vw}) - \alpha_m (I_{Um} + I_{Vm}),
 \end{aligned} \tag{1}$$

92

93 It is also convenient to track the dynamics of the total density of hosts infected with the same  
 94 strain  $i$ ,  $I_i := I_{U_i} + I_{V_i}$ , which yields:

$$\dot{I}_i = \underbrace{\left( \left( \beta_i \frac{S_U}{N} + e_i \beta_i \frac{S_V}{N} \right) - (\delta + \alpha_i + \gamma_i) \right)}_{r_i = \text{growth rate of strain } i} I_i \quad (2)$$

95 The ability of the strains to grow is given by the sign of the growth rate  $r_i$ . Note that this growth  
 96 rate depends on the four different traits of the pathogen:  $\alpha_i, \beta_i, \gamma_i, e_i$ . But this growth rate depends  
 97 also on the densities  $S_U$  and  $S_V$ , which vary with  $t$ , the time since the start of vaccination (i.e.,  
 98 vaccination starts at  $t = 0$ ). The coefficient of selection  $s_m$  on the mutant strain relative to the  
 99 wild type is:

$$s_m = r_m - r_w = (\beta_m - \beta_w) \frac{S_U}{N} + (e_m \beta_m - e_w \beta_w) \frac{S_V}{N} - (\alpha_m - \alpha_w + \gamma_m - \gamma_w) \quad (3)$$

100 In other words, both the genetics (the traits of strain  $i$ ) and the environment (the epidemiological  
 101 state of the host population) govern selection and strain dynamics.

### 102 3.2 Pathogen eradication and vaccination threshold

103 The ability of the wild-type pathogen population to grow can be measured by its effective per-  
 104 generation reproduction ratio which is given by:

$$R_w^e = R_w \left( \frac{S_U}{N} + e_i \frac{S_V}{N} \right) \quad (4)$$

105 where  $R_i = \frac{\beta_i}{\delta + \alpha_i + \gamma_i}$ . Hence, a reduction of the availability of susceptible hosts with vaccination  
 106 may drive down the density of the wild-type pathogen when the production of new infected hosts  
 107 (infection “birth”) does not compensate for the recovery and death of infected hosts (infection  
 108 “death”), that is when  $R_w^e < 1$ . Ultimately, vaccination can even lead to the eradication of the  
 109 wild-type pathogen (**Figure 1a**) either when the vaccine is sufficiently efficient ( $e_w R_w > 1$ ) or  
 110 when the vaccination coverage is sufficiently high [34, 16]. The deterministic model (1) can be used

111 to identify the threshold  $\nu_c$  of the speed of vaccination rollout above which the wild-type pathogen  
112 can be driven to extinction (see Methods and SI Section 1):

$$\nu_c = \frac{R_w(\delta(1 - (1 - e_w)p) + \omega) - (\delta + \omega)}{1 - R_w e_w} \quad (5)$$

113 As expected, better vaccines (i.e., lower values of  $e_w$  and  $\omega$ ) yield lower threshold values for the  
114 speed of vaccination. Imperfect vaccines (i.e., higher values of  $e_w$  and  $\omega$ ), in contrast, are un-  
115 likely to allow eradication. Note that, if we wait sufficiently long, the population of the wild-type  
116 pathogen will be driven to extinction in a *stochastic* way even when  $\nu < \nu_c$ . Indeed, in a finite  
117 host population, sooner or later, the pathogen population is doomed to become extinct because of  
118 demographic stochasticity, but the extinction time when  $\nu < \nu_c$  will usually be very long, increas-  
119 ing exponentially with the system size  $n$ . From now on, we are going to neglect the possibility of  
120 extinction of the wild type due to vaccination when  $\nu < \nu_c$  (which is a good approximation when  
121  $n$  is large) but will return to it in the discussion.

122

123 The spread of a new pathogen variant may erode the efficacy of vaccination and, consequently,  
124 could affect the ability to control and, ultimately, to eradicate the pathogen. But before the  
125 replacement of the wild type by a vaccine-escape variant the pathogen population may go through  
126 three steps that may result (or not) in pathogen adaptation: (1) introduction of the vaccine-escape  
127 variant by mutation, (2) extinction (**Figure 1c**) or invasion ((**Figure 1d-e**)) of the vaccine-escape  
128 variant, (3) fixation (**Figure 1e**) or not of the vaccine-adapted variant. Each of these steps is very  
129 sensitive to stochasticity because the number of vaccine-escape variants is very small in the early  
130 phase of its emergence.

### 131 **3.3 Step 1: Introduction of the variant by mutation**

132 The first step of adaptation is driven by the production of new variants by the wild-type pathogen  
133 through mutation. The level of adaptation to unvaccinated and vaccinated hosts may vary among  
134 those variants [10]. Vaccine-escape mutations that do not carry any fitness costs (or may even  
135 be adaptive) in unvaccinated hosts are expected to invade and fix relatively easily irrespective of

136 the vaccination strategy. We thus focus on variants that carry fitness costs in immunologically  
137 naïve hosts (i.e., variants *specialized* on vaccinated hosts [10]). In principle, the introduction of  
138 the vaccine-escape mutation may occur before the rollout of vaccination. The distribution of these  
139 mutations is expected to follow a stationary distribution resulting from the action of recurrent  
140 mutations and negative selection (see Methods). If these fitness costs are high and/or if the mutation  
141 rate is low these pre-existing mutants are expected to be rare. In the following, we neglect the  
142 presence or pre-existing mutants and we focus on a scenario where the first vaccine-escape mutant  
143 appears after the start of vaccination (but see Methods, section 5.5).

144 At the onset of the vaccination campaign (i.e.,  $t = 0$ ) we assume that the system is at the  
145 endemic equilibrium (i.e., the equilibrium densities  $S_U^0$ ,  $I_{Uw}^0$  and  $I_{Vw}^0$  are given in (11) in the  
146 Methods). We assume that an individual host infected with the wild type produces vaccine-escape  
147 mutants at a small, constant rate  $\theta_U/n$  if unvaccinated and  $\theta_V/n$  if vaccinated. In addition, we  
148 assume that  $\theta_U$  and  $\theta_V$  are small enough that within-host clonal interference is unlikely, and that  
149  $\theta_V \geq \theta_U$  to account for the fact that within-host selection may favor mutants in vaccinated hosts.  
150 The total production of mutants is thus equal to  $\frac{\theta_U}{n} I_{Uw}^n(t) + \frac{\theta_V}{n} I_{Vw}^n(t) \approx \theta_U I_{Uw}(t) + \theta_V I_{Vw}(t)$ ,  
151 so that the probability density  $f_m(t)$  of the arrival time  $t = t_m$  of the vaccine-escape mutant is  
152 approximated by:

$$f_m(t) = (\theta_U I_{Uw}(t) + \theta_V I_{Vw}(t)) e^{-\int_0^t (\theta_U I_{Uw}(s) + \theta_V I_{Vw}(s)) ds}. \quad (6)$$

153 In other words, the time  $t_m$  at which the vaccine-escape variant is introduced by mutation  
154 depends on the dynamics of the incidence of the infections by the wild type. Plots of  $f_m$  for  
155 different values of rollout speed  $\nu$  in **Figure 3** show that a faster rollout of vaccination delays the  
156 introduction of the vaccine-escape mutant. Indeed, a faster rollout is known to result in a drop  
157 of the incidence (the honey-moon period) [34, 13] which is expected to decrease the influx of new  
158 variants during this period. **Figure 3** also shows how higher values of  $\theta_V$  can increase the influx of  
159 vaccine-escape variants. As discussed in the following section, the subsequent fate of vaccine-escape  
160 mutants depends strongly on the timing of their arrival.



### 161 3.4 Step 2: Variant invasion

162 Immediately after its introduction, the dynamics of the vaccine-escape mutant may be approximated  
163 by a time-inhomogeneous birth-death process where the rate of birth (i.e., rate of new infections  
164 by the mutant) varies with the availability of susceptible hosts (see Methods, section 5.3). The  
165 probability that a single mutant with time-varying birth rate  $b_m(t) = \beta_m \left( \frac{S_U(t)}{N(t)} + \frac{e_m S_V(t)}{N(t)} \right)$  and  
166 constant death rate  $d_m = \delta + \alpha_m + \gamma_m$ , introduced at time  $t_m$ , successfully invades (see [24] and  
167 SI, Section 2) is:

$$P_m^{t_m} = \frac{1}{1 + \int_{t_m}^{\infty} d_m e^{-\int_{t_m}^t b_m(s) - d_m ds} dt} \quad (7)$$

168 Plotting the probability of invasion vs.  $t_m$  in **Figure 4** shows that the time at which the vaccine-  
169 escape mutant is introduced has a dramatic impact on the probability of escaping early extinction.  
170 If the mutant is introduced early, the density  $S_V(t)$  of susceptible vaccinated hosts remains very  
171 low and the selection for the vaccine-escape mutant is too small to prevent stochastic extinctions.  
172 The probability of invasion increases with selection, and thus with the density of vaccinated hosts,  
173 which tends to increase with time (see equation (3)).

174 Taking  $t_m \rightarrow \infty$  allows us to tackle the situation when the vaccine-escape mutant appears at  
175 the endemic equilibrium, i.e., when the densities of unvaccinated and vaccinated susceptible hosts  
176 are  $S_U^*$  and  $S_V^*$ , respectively. At that point in time the effective per-generation reproduction ratio  
177 of genotype  $i$  (i.e. the expected number of secondary infections produced by pathogen genotype  $i$ )  
178 is:

$$R_i^* = R_i \left( \frac{S_U^*}{N^*} + e_i \frac{S_V^*}{N^*} \right) \quad (8)$$

179 By definition, at the endemic equilibrium set by the wild-type pathogen we have  $R_w^* = R_w^e = 1$ .  
180 Hence, a necessary condition for the mutant to invade this equilibrium is  $R_m^* > 1$ , i.e., the effective  
181 reproduction number of the mutant has to be higher than that of the wild type (see SI, Section 1).  
182 However, this is not a sufficient condition: many mutants that satisfy this condition will rapidly  
183 go extinct due to demographic stochasticity. But in contrast to an early introduction of the mu-  
184 tant discussed above, the stochastic dynamics of the mutant is approximately a *time-homogeneous*  
185 branching process because the birth rate of the mutant approaches  $b_m^* = \beta_i \left( \frac{S_U^*}{N^*} + e_i \frac{S_V^*}{N^*} \right)$ . This

186 birth rate is constant because the density of susceptible hosts remains constant at the endemic  
187 equilibrium. The probability of mutant invasion after introducing a single host infected by the  
188 mutant is thus (see SI Section 1; **Figure 4**):

$$P_m^* = \lim_{t_m \rightarrow \infty} P_m^{t_m} = 1 - \frac{R_w^*}{R_m^*} = 1 - \frac{1}{R_m^*} \quad (9)$$

189 Note that we recover the strong-selection result of [36]. This expression shows that *at this endemic*  
190 *equilibrium* the fate of the mutant is fully governed by the per-generation reproduction ratio of  
191 the two strains, but does not depend on the specific values of the life-history traits of the mutant  
192 (provided the different vaccine-escape variants have the same value of  $R_m^*$ ).

193 Interestingly, unlike  $P_m^*$ , the probability  $P_m^{t_m}$  of mutant invasion at time  $t_m$  given in (7) is not  
194 governed solely by  $R_i$ , but rather depends on the life-history traits of the mutants. For instance,  
195 assume that two vaccine-escape mutants have the same values of  $R_m$  and  $e_m$  but they have very  
196 different life-history strategies. The “slow” strain has low rates of transmission and virulence (in  
197 green in **Figure 4**) while the “fast” strain has high rates of transmission and virulence (in red  
198 in **Figure 4**). **Figure 4** shows that the high mortality rate of hosts infected by the fast strain  
199 increases the risk of early extinction and lowers the probability of invasion relative to the slow  
200 strain. Hence, in the early stage of adaptation, pathogen life-history matters and favours slow  
201 strains with lower rates of transmission and virulence.

### 202 **3.5 Step 3: After variant invasion**

203 Successful invasion of the vaccine-escape mutant means that it escaped the “danger zone” when its  
204 density is so low that it is very likely to go extinct (**Figure 1d-f**). After this invasion we can describe  
205 the dynamics of the polymorphic pathogen population using the deterministic approximation (1).

206 Because the invasion of the mutant at the endemic equilibrium set by the wild type requires  
207 that  $R_m^* > R_w^*$ , we may expect from the analysis of the deterministic model that the mutant would  
208 always replace the wild-type pathogen. That is, the wild-type pathogen would go extinct before  
209 the mutant (**Figure 1f**). This is indeed the case when the phenotypes of the mutant and the wild  
210 type are not very different because of the “invasion implies fixation” principle [17, 5, 37]. Yet, this

211 principle may be violated if the phenotype of the vaccine-escape mutant is very different than the  
212 phenotype of the wild type.

213 First, if the two genotypes ( $w$  and  $m$ ) are sufficiently specialized on the two hosts, the long-term  
214 coexistence of the two genotypes is possible (**Figure 1e**). Second, the vaccine-escape mutant may  
215 be driven to extinction before the wild type if its life-history traits induce massive epidemiological  
216 perturbations after its successful invasion (**Figure 1d**). As pointed out by previous studies, more  
217 transmissible and aggressive pathogen strategies may yield larger epidemics because the speed of  
218 the epidemic is governed by the per-capita growth rate  $r_i$ , not the per-generation reproduction  
219 ratio  $R_i$  [13]. This explosive dynamics is followed by a decline which results in a very low incidence  
220 of the vaccine-escape mutant. In a finite host population, this may result in the extinction of the  
221 vaccine-escape mutant before the wild type [41]. We capture this outcome with a hybrid analytical-  
222 numerical approach that computes the probability  $P_{fix}^{tm}$  that the wild type will go extinct before  
223 the mutant (see Methods, section 5.4). **Figure 5** shows that two vaccine-escape mutants may have  
224 very different probabilities of fixation, even if they have the same per-generation reproduction ratio.  
225 The numerical computation of the probability of fixation agrees very well with individual-based  
226 stochastic simulations (**Figure S1**). The faster strain is unlikely to go to fixation because invasion  
227 is followed by a period where the birth rate drops to very low levels (far below the mortality  
228 rates, **Figure S2**). In other words, a more aggressive strategy will more rapidly degrade its  
229 environment, by depleting susceptible hosts, which is known to increase the probability of extinction  
230 [6]. Interestingly, this effect is only apparent when the time of introduction  $t_m$  is large. Indeed,  
231 when the mutant is introduced soon after the start of vaccination, its probability of invasion is  
232 already very low because its initial growth rate is negative (**Figure S2a, b, c**). When the mutant  
233 is introduced at intermediate times, the initial growth rate of the mutant is positive because some  
234 hosts are vaccinated (**Figure S2d, e, f**). If the vaccine-escape mutant is introduced later, the  
235 growth rate of the mutant is initially very high as many hosts are vaccinated (and thus susceptible  
236 to the vaccine-escape mutant) but this is rapidly followed by a drop in host density (especially  
237 pronounced with the faster strain) which prevents the long-term establishment of the faster strain  
238 (see **Figure S2g, h, i**).

### 239 3.6 The overall risk of pathogen adaptation

240 The overall probability that the pathogen will adapt to vaccination (*i.e.* that a vaccine-escape  
241 variant will replace the wild-type) depends upon the probability that the mutation will arise (step  
242 1) and the probability that this mutation will escape early extinction (step 2) and eventually go to  
243 fixation (step 3). It is particularly relevant to explore the effect of the speed of vaccination rollout  
244 on the overall probability that some vaccine-adapted variant invades before a time  $t$  after the start  
245 of the vaccination campaign (steps 1 and 2, **Figure 6**):

$$A_m^t = 1 - e^{-\int_0^t (\theta_U I_{Uw}(s) + \theta_V I_{Vw}(s)) P_m^s ds}. \quad (10)$$

246 As expected, when  $\nu < \nu_c$  this probability of adaptation goes to 1 when  $t \rightarrow \infty$ . Indeed,  
247 when vaccination cannot eradicate the wild type, a vaccine-adapted variant will eventually appear  
248 by mutation and invade. When  $\nu > \nu_c$ , we recover a classical evolutionary rescue scenario where  
249 the arrival and the spread of a vaccine-adapted variant may stop the eradication [32, 2, 4]. Since  
250 vaccination is unlikely to lead to eradication we focus here on a scenario where  $\nu < \nu_c$  and we  
251 use equation (10) to analyse the effect of the speed of adaptation on the probability of pathogen  
252 adaptation at a time  $t$  after the start of vaccination. Crucially, the risk of pathogen adaptation is  
253 maximized for intermediate values of the speed of vaccination rollout. This is due to the antagonistic  
254 consequences the speed of the rollout has upon these two steps of adaptation (compare **Figures 3**  
255 **and 4**). Faster rollout reduces the influx of new mutations, but increases selection for vaccine-escape  
256 mutations. Notice how the risk of adaptation drops with the speed of the rollout of vaccination  
257 before the critical speed,  $\nu < \nu_c$ , that may ultimately lead to eradication. When the speed of  
258 vaccination is just below  $\nu_c$ , vaccination coverage is not high enough to allow eradication, but it is  
259 high enough to reduce massively the probability of adaptation through the reduction of the influx of  
260 new mutations. As expected, variants with different life-history may have different probabilities of  
261 adaptation. Indeed, as pointed out in the previous section, faster variants have a lower probability  
262 of invasion when the variant is introduced at the beginning of the vaccination campaign (**Figure**  
263 **4**). This effect is relatively small but it is expected to be magnified by the subsequent risk of

264 extinction following invasion (**Figure 5**).

## 265 4 Discussion

266 Vaccination is a powerful tool to control the spread of infectious diseases, but some pathogens may  
267 evolve the ability to escape the immunity triggered by vaccines. Will SARS-CoV-2 adapt to the  
268 different vaccines that are currently being used to halt the ongoing pandemic? Does the likelihood  
269 of this adaptation depend on the speed of the vaccination rollout? To answer this question we must  
270 first understand the different steps that may eventually lead to adaptation to vaccination.

271 Mutation is the fuel of evolution, and the first step of adaptation to vaccination is the mutational  
272 process that produces vaccine-escape variants. Even if initial estimates of SARS-CoV-2 mutation  
273 rates were reassuringly low [38], the virus has managed to evolve higher rates of transmission [9, 45]  
274 and these adaptations are challenging current control measures used to slow down the ongoing  
275 pandemic. The ability of the SARS-CoV-2 virus to escape the immunity triggered by some of the  
276 vaccines is worrying and suggests that viral adaptation may weaken vaccine efficacy [46]. The rate  
277 at which these potential vaccine-escape mutations are introduced depends on the density of hosts  
278 infected by the wild-type virus. In this respect, a faster rollout of vaccination is expected to delay  
279 the arrival of these mutations (**Figure 3**).

280 Some authors have argued that the emergence of vaccine-escape mutations may be more likely  
281 in infected hosts which are partially immunized [12, 8, 10]. Our model can be used to explore  
282 the consequences of this within-host evolution in vaccinated hosts (*e.g.*, taking  $\theta_V > \theta_U$ ). A  
283 larger value of  $\theta_V$  increases the overall rate of mutation (**Figure 3**) but this effect is modulated  
284 by the fraction of the host population that is vaccinated. Consequently, when  $\theta_V > \theta_U$ , the  
285 speed of vaccination rollout can have a non-monotonic effect on the probability that a vaccine-  
286 escape mutation is introduced (see **Figure S3**). Indeed, when the rate of vaccination remains low,  
287 the enhancing effect of vaccination on the rate of mutation can counteract the delaying effect of  
288 faster vaccination rollout discussed above. But the probability that a vaccine-escape mutation is  
289 introduced drops to very low levels when the rate of vaccination becomes overwhelmingly high.

290 The second step of adaptation starts as soon as the vaccine-escape mutant has been introduced

291 in the pathogen population. Will this new variant go extinct rapidly or will it start to invade? The  
292 answer to this question depends on the time at which the mutant is introduced. If the mutant is  
293 introduced when the population is not at an endemic equilibrium, the fate of the mutant depends  
294 on a time-varying birth rate which is driven by the fluctuations of the density of susceptible hosts.  
295 Earlier introductions are likely to result in rapid extinction because there are simply not enough  
296 vaccinated hosts to favour the mutant over the wild type. Moreover, we found that earlier introduc-  
297 tions are likely to favour slower life-history strategies which are less prone to early extinction. If the  
298 introduction takes place later, when the system has reached a new endemic equilibrium, the fate  
299 of the mutant is solely governed by the effective per-generation ratio  $R_m^*$  and does not depend on  
300 the life-history traits of the mutant. Slow and fast variants have equal probability to invade if they  
301 have the same  $R_m^*$ . Altogether, our results suggest that earlier arrival may not always facilitate  
302 invasion since the probability of invasion is limited by the time-varying epidemiological state of the  
303 host population.

304 The third step of adaptation starts as soon as the hosts infected by the vaccine-escape mutant  
305 are abundant and the effect of demographic stochasticity on the dynamics of this mutation becomes  
306 negligible. Our analysis attempts to better characterize the dynamics of the mutant after invasion  
307 using a combination of deterministic and analytical approximations. In principle, conditional on  
308 invasion, we can use the deterministic model (1) to describe the joint dynamics of the mutant and  
309 the wild type. In particular, the speed at which the vaccine-escape mutant spreads in the pathogen  
310 population can be well approximated by the deterministic model. This may be particularly useful to  
311 address the impact of various vaccination strategies on the speed of the spread of a vaccine-adapted  
312 variant [15]. In the present work we show that life-history traits of the vaccine-escape mutant drive  
313 the speed of its spread. Indeed, as pointed out before, the deterministic transient dynamics depends  
314 on the per-capita growth rate of the mutant  $r_m$ , not its per-generation reproduction ratio  $R_m$  [13].  
315 Transient dynamics may favour a fast and aggressive variant because this life-history strategy may  
316 be more competitive away from the endemic equilibrium. Yet, this explosive strategy may be risky  
317 for the pathogen if it leads to epidemiological fluctuations that result in a massive drop in the  
318 number of infections. The consequences of such fluctuations on the extinction risk of the variant

319 can be accounted for by a generalized birth-death process where the per-capita growth rate of  
320 the mutant varies with time. Epidemiological fluctuations lead to a degradation of the future  
321 environment (i.e., depletion of the density of susceptible hosts) which results in an increased risk  
322 of extinction [24, 6].

323 A comprehensive understanding of pathogen dynamics after vaccination relies on the use of  
324 a combination of theoretical tools to capture the interplay between stochastic and deterministic  
325 forces. Here, we use a hybrid numerical-analytical approach to account for the three successive steps  
326 that may eventually lead to the fixation of a vaccine-escape mutant. This theoretical framework  
327 is particularly suitable to explore the influence of different vaccination strategies on the risk of  
328 pathogen adaptation. In particular, we show that this risk drops to very low levels even when the  
329 speed of vaccination rollout is below the threshold value that may eventually lead to eradication (i.e.,  
330  $\nu < \nu_c$ ). In other words, faster vaccination rollout makes sense even when eradication is unfeasible,  
331 because faster rollout decreases both the number of cases and the likelihood of pathogen evolution.  
332 This conclusion is akin to the general prediction that the rate of pathogen adaptation should be  
333 maximized for intermediate immune pressure or for medium doses of chemotherapy at the within-  
334 host level [20, 39, 19, 1, 21, 11, 2]. Most of these earlier studies focused on evolutionary rescue  
335 scenarios where the wild type is expected to be rapidly driven to extinction by human intervention.  
336 Our versatile theoretical framework, however, allows us to deal with a broad range of situations  
337 where the intervention is not expected to eradicate the pathogen. Accounting for the dynamics of  
338 the wild type affects both the flux of mutation and the fate of these mutations.

339 The framework we have developed can be readily extended to explore many other situations.  
340 For instance, our model can be modified to explore the influence of temporal variations in the  
341 environment that could be driven by seasonality or by non-pharmaceutical interventions (NPIs).  
342 We explored a situation where the transmission rate of all variants is periodically reduced by a  
343 quantity  $1 - c(t)$ , where  $c(t)$  is a measure of the intensity of NPIs. These periodic interventions  
344 affect both the flux of mutations and the probability that these mutations invade ( **Figures S3**  
345 and **S4**). Notably, NPIs lower the probability of mutant introduction through the reduction in  
346 the density of hosts infected by the wild type. As a consequence, the probability of adaptation

347 is reduced when vaccination is combined with periodic control measures (**Figure 6**). Hence, our  
348 approach helps to understand the interaction between vaccination and NPI discussed in earlier  
349 studies [40, 31]. It would also be interesting to relax several simplifying assumptions we are using  
350 in the current version of the model. First, we could study situations where the pathogen population  
351 has not reached an endemic equilibrium when selection (e.g., vaccination or chemotherapy) starts  
352 to be applied. Second, it would be interesting to relax other assumptions made here, such as  
353 frequency-dependent transmission or life-long immunity after recovery. Accounting for natural  
354 recovery would require yet another class of imperfectly immune hosts. Similarly, another interesting  
355 extension of our model would be to study the effect of a diversity of vaccines in the host population.  
356 This diversity of immune profiles could slow down pathogen adaptation if the escape of different  
357 vaccines requires distinct mutations [44, 7, 35]. Finally, it is important to recall that we focus here  
358 on a simplified scenario where we analyse the evolutionary epidemiology of an isolated population.  
359 In real-life situations the arrival time may depend more on the immigration of new variants from  
360 abroad than on local vaccination policies. The influence of migration remains to be investigated in  
361 spatially structured models where vaccination may vary among populations [18].

## 362 **5 Methods**

363 In this section, we present how extinction, invasion and fixation probabilities may be obtained  
364 under strong-selection assumptions when a mutant strain appears in a host-pathogen system that  
365 is away from its endemic equilibrium. Our essential tools are the deterministic ordinary differential  
366 equations (1) and birth-and-death approximations, which we discuss below. The former allows us to  
367 consider the situation when all strains are abundant, the latter when at least one strain is rare. We  
368 will limit ourselves to an informal treatment, presenting heuristic arguments and deferring rigorous  
369 proofs and sharp error bounds to a future treatment. In the following we present a simple, yet  
370 versatile, hybrid (i.e., semi-deterministic) framework which allows us to approximate the probabili-  
371 ties associated with different steps of adaptation (mutation, invasion, fixation) via adding auxiliary  
372 equations describing stochastic phenomena, to the deterministic ordinary differential equations  
373 describing the global population dynamics.



## 374 5.1 Before the introduction of a variant

375 We assume that vaccination starts after the monomorphic population of the wild-type pathogen  
376 has reached its endemic equilibrium,

$$\begin{aligned}
 S_U^0 &= \frac{\lambda(\delta + \gamma_w)}{\delta(\beta_w - \alpha_w)} \\
 S_V^0 &= 0 \\
 I_{Uw}^0 &= \frac{\lambda(R_w - 1)}{\beta_w - \alpha_w} \\
 I_{Vw}^0 &= 0 \\
 N^0 &= \frac{\lambda R_w(\delta + \gamma_w)}{\delta(\beta_w - \alpha_w)}
 \end{aligned} \tag{11}$$

377 We then use the following ordinary differential equations to track the deterministic dynamics  
378 of the wild-type pathogen using the endemic equilibrium before vaccination (11) as the initial  
379 condition:

$$\begin{aligned}
 \dot{S}_U &= \lambda(1 - p) + \omega S_V - \left( \beta_w \frac{I_{Uw} + I_{Vw}}{N} + \delta + \nu \right) S_U \\
 \dot{S}_V &= \lambda p + \nu S_U - \left( e_w \beta_w \frac{I_{Uw} + I_{Vw}}{N} + \delta + \omega \right) S_V \\
 \dot{I}_{Uw} &= \beta_w (I_{Uw} + I_{Vw}) \frac{S_U}{N} - (\delta + \alpha_w + \gamma_w) I_{Uw} \\
 \dot{I}_{Vw} &= e_w \beta_w (I_{Uw} + I_{Vw}) \frac{S_V}{N} - (\delta + \alpha_w + \gamma_w) I_{Vw} \\
 \dot{N} &= \lambda - \delta N - \alpha_w (I_{Uw} + I_{Vw}).
 \end{aligned} \tag{12}$$

Letting  $I_w = I_{Uw} + I_{Vw}$ , we get from (12):

$$\dot{I}_w = \beta_w (S_U + e_w S_V) \frac{I_w}{N} - (\delta + \alpha_w + \gamma_w) I_w.$$

A new endemic equilibrium will thus be approached after vaccination if and only if the growth rate  $r_w = \beta_w (S_U + e_w S_V) / N - (\delta + \alpha_w + \gamma_w)$  is positive, or equivalently if the effective per-generation reproduction ratio

$$R_w^e = R_w \left( \frac{S_U}{N} + e_w \frac{S_V}{N} \right)$$

380 is larger than 1, when  $S_U$  and  $S_V$  are taking their stationary values  $\tilde{S}_U$  and  $\tilde{S}_V$  in the absence of  
381 infection. Computing these values (see SI, Section 1) shows that  $R_w^e > 1$  if and only if  $e_w R_w > 1$   
382 or  $\nu > \nu_c$ , where

$$\nu_c = \frac{R_w(\delta(1 - (1 - e_w)p) + \omega) - (\delta + \omega)}{1 - R_w e_w} \quad (13)$$

383 Thus we see that if  $e_w R_w < 1$  and the speed of the vaccination rollout is higher than the critical  
384 value  $\nu_c$  the wild type will be driven to extinction deterministically.

385 For values of the vaccination rollout  $\nu$  smaller than this threshold  $\nu_c$ , or when  $e_w R_w > 1$ , the wild-  
386 type may also become extinct because of demographic stochasticity. We can neglect this possibility  
387 because the timescale of stochastic extinction from abundances of the order of  $n$  is much larger  
388 than those of the processes under consideration.

## 389 5.2 Introduction of the variant by mutation (step 1)

390 As indicated above, we use a time-inhomogeneous Poisson point process to model the influx of  
391 new mutations. The per capita rate of mutation is assumed to be constant through time but  
392 whether or not a mutant will escape extinction within a host may depend on the type of host.  
393 Indeed, a vaccine-escape mutation may have a higher probability to escape within-host extinction in  
394 vaccinated hosts. We account for this effect by making a distinction between  $\theta_U$  and  $\theta_V$ . If vaccine-  
395 escape mutations are more likely to escape extinction in vaccinated hosts we expect  $\theta_V > \theta_U$ . In  
396 other words,  $\theta_V/\theta_U - 1$  is a measure of the within-host fitness advantage of the vaccine-escape  
397 mutant in vaccinated hosts (they are assumed to have the same within-host fitness in naïve hosts).

398 We can compute the probability that some of the vaccine-escape mutations are present as  
399 standing variation before the start of vaccination. When the resident population has reached its  
400 endemic equilibrium  $(S_U^0, 0, I_{Uw}^0, 0, N^0)$ , the number of mutants is approximated by a birth-and-  
401 death process with immigration, with birth rate  $b_m^0 = \beta_m \frac{S_U^0}{N^0}$  and death rate  $d_m = \delta + \alpha_m + \gamma_m$ ,  
402 and the “immigration” is actually mutations arising in the resident population, which occur at rate  
403  $\mu_m = \theta_U I_{Uw}^0$ . Because we assume that in a fully naïve host population vaccine-escape mutations  
404 carry a fitness cost relative to the resident strain, we have  $b_m^0 < d_m$ . The number of mutants  
405 thus approximately follows a subcritical birth-and-death process with immigration, which is known

406 to converge in distribution as  $t \rightarrow \infty$  to a negative binomial stationary distribution [30]. The  
407 probability that there are  $k$  infected individuals hosting the mutant pathogen at time  $t = 0$  is thus:

$$p_k = \binom{k+r-1}{k} (1-R_m^0)^r (R_m^0)^k \quad (14)$$

408 where  $r = \mu_m/b_m^0$  and  $R_m^0 = b_m^0/d_m$ . Hence the the expected number of vaccine-escape mutants  
409 already present at the start of vaccination is

$$\frac{\mu_m}{d_m - b_m}. \quad (15)$$

410 This result is analogous to the classical result that the expected frequency of deleterious mutations  
411 is of the form  $\mu/s$  where  $\mu$  is the rate of mutation towards deleterious mutants and  $s$  is the fitness  
412 cost of those deleterious mutants.

413 We can also compute the probability that no mutant is present at the start of vaccination:

$$p_0 = (1 - R_m^0)^r \quad (16)$$

414 When either  $R_m^0$  or  $r$  is small,  $p_0 \approx 1$ , and we can neglect the presence of preexisting mutants.  
415 Otherwise, we need to account for the possibility that one or more mutants are present at time  
416  $t = 0$ , which we discuss in Section 5.5 below.

417 We now assume that there is zero mutant present at the start of vaccination. We are interested  
418 in the law of the first time  $t_m$  at which a mutant appears. Because  $\theta_U I_{Uw}(t) + \theta_V I_{Vw}(t)$  is the flux  
419 of vaccine-escape mutants from the wild-type population, by the exponential formula for Poisson  
420 point processes, we have [27]:

$$\mathbb{P}\{t_m > t\} = e^{-\int_0^t (\theta_U I_{Uw}(s) + \theta_V I_{Vw}(s)) ds}. \quad (17)$$

421 We can numerically compute the probability density function  $f_m$  of the first arrival time  $t_m$  of a  
422 vaccine-escape mutant using

$$f_m(t) = \dot{F}_m(t) e^{-F_m(t)}, \quad (18)$$

423 where  $F_m(t)$  is given by the auxiliary equation

$$\dot{F}_m = \theta_U I_{Uw}(t) + \theta_V I_{Vw}(t) \quad (19)$$

424 with initial condition  $F_m(0) = 0$ , while we compute  $I_{Uw}(t)$  and  $I_{Vw}(t)$  using (12). The use of this  
425 auxiliary equation reduces computational effort by obtaining  $F_m(t)$  simultaneously with  $I_{Uw}(t)$  and  
426  $I_{Vw}(t)$  (as opposed to computing the latter and then integrating).

### 427 **5.3 Invasion of the variant (step 2)**

428 Suppose that a mutant strain appears at time  $t_m \geq 0$  in a single infected host, that is, with density  
429  $I_m(0) = \frac{1}{n}$ , (which is effectively zero as  $n$  becomes large). Then, (2) yields  $I_m(t_m) \equiv 0$  for all  $t$ ,  
430 whereas the dynamics of the system follows (12). This differential equation approximation does  
431 not mean that the mutant is absent, but simply not sufficient in numbers to be visible at the coarse  
432 resolution and short time scale upon which (12) is applicable.

433 Then we combine (12) with a birth-and-death process approximation,  $\tilde{I}_m(t)$ , to the *number*  
434 of individuals infected with the mutant strain at time  $t$  after the mutant arrival time  $t_m$ ,  $I_m^n(t)$ .  
435 We approximate the rate of new infections,  $\frac{\beta_m(S_U^n(t) + e_m S_V^n(t))}{N^n(t)}$  by replacing the stochastic quantities  
436  $S_U^n(t)$ ,  $S_V^n(t)$  and  $N^n(t)$  by their deterministic approximations, giving the time-dependent birth  
437 rate

$$b_m(t) = \frac{\beta_m(S_U(t) + e_m S_V(t))}{N(t)}$$

438 where  $S_U(t)$ ,  $S_V(t)$  and  $N(t)$  are determined via the deterministic system (12). Each death in the  
439 birth-and-death process corresponds to the removal of a susceptible, which occurs by host death or  
440 recovery at combined rate  $d_m = \delta + \alpha_m + \gamma_m$ . See §8.2 in the Supplementary Information of [36]  
441 for a rigorous justification.

442 The so-called “merciless dichotomy” [23] tells us that the time-inhomogeneous birth-and-death  
443 process started with one individual at time  $t_m$  either goes extinct, or grows without bound (i.e.

444 invades) with probability (see [24] and SI, Section 2)

$$P_m^{t_m} = \frac{1}{1 + \int_{t_m}^{\infty} d_m e^{-\int_{t_m}^t b_m(s) - d_m ds} dt}$$

445 Thus, either the mutant strain vanishes, or the number infected with the mutant strain will even-  
 446 tually be of the order of  $n$  individuals, after which we can use (1) to compute the densities of both  
 447 wild-type and mutant strains.

In practice, we can compute the probability of mutant invasion when the mutant is introduced at time  $t_m$  using  $P_m^{t_m} = U_m^{t_m}(\infty)$  where  $U_m^{t_m}(\infty)$  is obtained via the pair of auxiliary functions  $U_m^{t_m}$  and  $V_m^{t_m}$  [24] defined as follows:  $U_m^{t_m}(t) = \mathbb{P}\{\tilde{I}_m(t) \neq 0\}$  and  $V_m^{t_m}(t) = \mathbb{P}\{\tilde{I}_m(t) = 1 \mid \tilde{I}_m(t) \neq 0\}$ . We then have

$$\dot{U}_m^{t_m} = -d_m U_m^{t_m} V_m^{t_m} \tag{20}$$

$$\dot{V}_m^{t_m} = (d_m - b_m(t)) V_m^{t_m} - d_m (V_m^{t_m})^2, \tag{21}$$

448 where  $U_m^{t_m}(t_m) = V_m^{t_m}(t_m) = 1$  and we compute  $b_m(t)$ ,  $S_U(t)$ ,  $S_V(t)$  and  $N(t)$ , via (12). In practice,  
 449 we cannot compute  $U_m^{t_m}(\infty)$ ; to obtain an approximation we evaluate  $U_m^{t_m}(t)$  for sufficiently large  
 450  $t$  that  $|U_m^{t_m}(t + \Delta t) - U_m^{t_m}(t)|$  is less than our desired threshold of error.

451 Note that several variants can arise and fail to invade before finally a lucky variant manages to  
 452 invade. We can use the probability of invasion  $P_m^t$  of a variant introduced at time  $t$  to characterize  
 453 the distribution of the first time  $t_i$  at which a mutant is introduced that successfully invades. By  
 454 the thinning property of Poisson point processes, we have [27]:

$$\mathbb{P}\{t_i > t\} = e^{-\int_0^t (\theta_U I_{Uw}(s) + \theta_V I_{Vw}(s)) P_m^s ds} \tag{22}$$

455 where  $\theta_U I_{Uw}(t) + \theta_V I_{Vw}(t)$  is the flux of vaccine-escape mutants from the wild-type population.  
 456 We compute numerically the probability density function  $g_m$  of the first arrival time  $t_i$  of a vaccine-

457 escape mutant that successfully invades using

$$g_m(t) = \dot{G}_m(t)e^{-G_m(t)}, \quad (23)$$

458 where  $G_m(t)$  is given by the auxiliary equation

$$\dot{G}_m(t) = (\theta_U I_{U_w}(t) + \theta_V I_{V_w}(t)) P_m^t \quad (24)$$

459 with initial condition  $G_m(0) = 0$  and computing  $I_{U_w}(t)$  and  $I_{V_w}(t)$  using (12).

Compare (22) with (17) and note that the probability that no vaccine-escape mutant will ever *arise* is

$$\mathbb{P}\{t_m = \infty\} = e^{-\int_0^\infty (\theta_U I_{U_w}(t) + \theta_V I_{V_w}(t)) P_m^t dt}.$$

In contrast, the probability that no vaccine-escape mutant will ever *invade* is the larger probability

$$\mathbb{P}\{t_i = \infty\} = e^{-\int_0^\infty (\theta_U I_{U_w}(t) + \theta_V I_{V_w}(t)) P_m^t dt}.$$

Note that  $P_m^t$  converges as  $t \rightarrow \infty$  to  $P_m^* = 1 - 1/R_m^*$  which is nonzero, so that

$$\mathbb{P}\{t_m = \infty\} = 0 \Leftrightarrow \int_0^\infty (\theta_U I_{U_w}(t) + \theta_V I_{V_w}(t)) dt = \infty \Leftrightarrow \mathbb{P}\{t_i = \infty\} = 0,$$

460 that is, the probability of adaptation is 1 if and only if  $t \mapsto (\theta_U I_{U_w}(t) + \theta_V I_{V_w}(t))$  is not integrable.

461 In other words, the probability of adaptation is 1 in the limit  $t \rightarrow \infty$  when the wild type is not

462 driven to extinction by vaccination (i.e.  $\nu < \nu_c$ ) which implies that there is an uninterrupted flux of

463 mutation producing vaccine-escape variants. One of these mutants will eventually escape extinction

464 and invade. Yet, the time needed for a successful variant to appear may be very long and we focus

465 in the main text on  $A_m^t$  the probability of adaptation before time  $t$  (equation (10) and Figure 6).

#### 466 5.4 Fixation of the variant (step 3)

467 Suppose now that the mutant strain successfully invades; we next consider the probability  $P_{fix}$   
 468 that the mutant will outcompete the wild type and go to fixation. Fixation of the mutant occurs if  
 469 it is still present when the wild-type strain disappears. If we let  $T_m$  and  $T_w$  be the extinction times  
 470 of mutant and wild-type strains, the probability of mutant fixation is thus  $\mathbb{P}\{T_w < T_m\}$  which we  
 471 may decompose as

$$\begin{aligned} \int_{t_m}^{\infty} \mathbb{P}\{T_m > t\} \mathbb{P}\{T_w \in dt\} &= - \int_{t_m}^{\infty} \mathbb{P}\{T_m > t\} \frac{d}{dt} \mathbb{P}\{T_w > t\} dt \\ &= - \int_{t_m}^{\infty} \mathbb{P}\{I_m^n(t) > 0\} \frac{d}{dt} (1 - \mathbb{P}\{I_w^n(t) = 0\}) dt \quad (25) \\ &= \int_{t_m}^{\infty} \mathbb{P}\{I_m^n(t) > 0\} \frac{d}{dt} \mathbb{P}\{I_w^n(t) = 0\} dt. \end{aligned}$$

472 We again obtain estimates of  $\mathbb{P}\{I_w^n(t) > 0\}$  and  $\mathbb{P}\{I_m^n(t) > 0\}$  using the fact that conditional  
 473 on  $S_U(t)$ ,  $S_V(t)$  and  $N(t)$ ,  $(\tilde{I}_w(t), \tilde{I}_m(t))$  follows a time-inhomogeneous, two-type birth-and-death  
 474 process, where the birth rates for the two types,  $i = w, m$ , are given by

$$b_i(t) = \frac{\beta_i(S_U(t) + e_i S_V(t))}{N(t)}$$

475 and the death rates are  $d_i = \delta + \alpha_i + \gamma_i$ . The birth rates vary with time due to the epidemiological  
 476 perturbations following the start of vaccination and in particular, to the feedback of mutant invasion  
 477 on  $S_V$  and  $S_U$ . To quantify these epidemiological perturbations, we now approximate the density  
 478 of susceptibles and total host density by the values of  $S_U(t)$ ,  $S_V(t)$  and  $N(t)$  obtained from the full  
 479 deterministic system (1), which accounts for the presence of the mutant by replacing  $I_m$  with its  
 480 *expected value*.

481 We need to take care in choosing the initial conditions of (1) to account for the fact that we  
 482 consider the time of appearance of the first mutant that successfully invades and so are conditioning  
 483 on the non-extinction of the mutant strain, and for the inherent variability in the time required to  
 484 invade; this results in a random initial condition for the deterministic dynamics (see Supplementary  
 485 Information §4 for details). In practice, we find that the randomness has negligible effect, but

486 we must still take the conditioning into account. To do so, we first use (12) to compute the  
 487 epidemiological dynamics of the wild type before the introduction of the mutant at time  $t_m$ . Then,  
 488 at time  $t_m$ , we use (1) where  $S_U(t_m)$ ,  $S_V(t_m)$ ,  $N(t_m)$  and  $I_w(t_m)$  are obtained from (12) and take  
 489  $I_m(t_m) = \frac{1}{(1-P_m^{t_m})^n}$  (see Supplementary Information §4). Crucially, the initial density of the mutant  
 490 depends on the probability of successful invasion of the mutant  $P_m^{t_m}$  obtained above.

491 Provided we use (1) with the appropriate initial conditions as previously, the birth rates of both  
 492 the wild-type and mutant strains are approximately deterministic, and from [24], we have:

$$\mathbb{P}\{I_i^n(t) > 0\} \approx \mathbb{P}\{\tilde{I}_i(t) > 0\} = 1 - (1 - U_i^{t_m}(t))^{I_i^n(t_m)}, \quad (26)$$

493 where

$$U_i^{t_m}(t) = \frac{1}{1 + \int_{t_m}^t d_i e^{-\int_{t_m}^u b_i(s) - d_i ds} du} \quad (27)$$

494 is the probability that an individual infected with strain  $i$  ( $i = m, w$ ) present at  $t_m$  has descendants  
 495 alive at time  $t$ . Under the branching assumption, the lines of descent of distinct infected individuals  
 496 are independent, hence the probability that strain  $i$  vanishes by time  $t$  is the product of the  
 497 probabilities that each line of descent vanishes,  $(1 - U_i^{t_m}(t))^{I_i^n(t_m)}$ .

In practice, we need two pairs of auxiliary equations to track the probability of extinction of both the wild type and the mutant

$$\dot{U}_w^{t_m} = -d_w U_w^{t_m} V_w^{t_m} \quad (28)$$

$$\dot{V}_w^{t_m} = (d_w - b_w(t)) V_w^{t_m} - d_w (V_w^{t_m})^2 \quad (29)$$

$$\dot{U}_m^{t_m} = -d_m U_m^{t_m} V_m^{t_m} \quad (30)$$

$$\dot{V}_m^{t_m} = (d_m - b_m(t)) V_m^{t_m} - d_m (V_m^{t_m})^2, \quad (31)$$

498 with  $U_w^{t_m}(t_m) = V_w^{t_m}(t_m) = U_m^{t_m}(t_m) = V_m^{t_m}(t_m) = 1$ . To compute the probability of fixation, we  
 499 first consider the probability of fixation prior to time  $t$ , which is derived in exactly the same manner  
 500 as (25).

$$U^{t_m}(t) = \int_{t_m}^t \mathbb{P}\{I_m^n(s) > 0\} \frac{d}{dt} \mathbb{P}\{I_w^n(s) = 0\} ds,$$



501 Using (26) to approximate the probabilities  $\mathbb{P}\{I_m^n(s) > 0\}$  and  $\mathbb{P}\{I_w^n(s) = 0\}$ , we get

$$U^{t_m}(t) = \int_{t_m}^t [1 - (1 - U_m^{t_m}(s))^{I_m^n(t_m)}][I_w^n(t_m)(-\dot{U}_w^{t_m})(1 - U_w^{t_m}(s))^{I_w^n(t_m)-1}]ds.$$

502 Differentiating this and taking  $I_w^n(t_m) = nI_w(t_m)$  and  $I_m^n(t_m) = 1$  yields the following auxiliary  
503 equation for  $U^{t_m}(t)$ :

$$\dot{U}^{t_m} = nI_w(t_m)(\delta + \alpha_w + \gamma_w)U_w^{t_m}V_w^{t_m}(1 - U_w^{t_m})^{nI_w(t_m)-1}U_m^{t_m}, \quad (32)$$

504 with initial condition  $U^{t_m}(t_m) = 0$ . We estimate the fixation probability as  $P_{fix}^{t_m} = U^{t_m}(\infty)$  as  
505 above.

## 506 5.5 Invasion and Fixation with Standing Variation

507 We now come back to the probability of adaptation from standing variation at time  $t = 0$ , using the  
508 probability  $p_k$  that there are  $k$  mutants present at time  $t = 0$  and the estimates for the probabilities  
509 of invasion and fixation  $P_m^{t_m}$  and  $P_{fix}^{t_m}$ , of a single mutant arriving at time  $t_m$ , taking  $t_m = 0$ . Recall  
510 that  $p_k$  is negative binomial with success probability  $R_m^0 = b_m^0/d_m$  and  $r = \mu_m/b_m^0$  failures. Under  
511 the branching process approximation, the chain of infections started by each mutation will go  
512 extinct independently with probability  $1 - P_m^0$ . The probability of invasion is then the probability  
513 that at least one line survives,  $1 - (1 - P_m^0)^k$ . Summing this over all possible values of  $k$  gives us  
514 the invasion probability from standing variation,

$$\sum_{k=1}^{\infty} p_k (1 - (1 - P_m^0)^k) = 1 - p_0 - \sum_{k=1}^{\infty} p_k (1 - P_m^0)^k = 1 - \sum_{k=0}^{\infty} p_k (1 - P_m^0)^k.$$

515 Recalling that the probability generating function for the number of mutants at time  $t = 0$  is

$$\sum_{k=0}^{\infty} p_k z^k = \left( \frac{1 - R_m^0}{1 - R_m^0 z} \right)^r,$$

516 which converges provided  $|z| < \frac{1}{R_m^0}$ , we see that the probability of invasion from standard variation  
517 is  $1 - \left( \frac{1 - R_m^0}{1 - R_m^0(1 - P_m^0)} \right)^r$ .

Similarly, if there are  $k$  mutations at time  $t = 0$ , (26) gives us that  $\mathbb{P}\{I_m^n(t) > 0 | I_m(0) = k\} \approx 1 - (1 - U_m^0(t))^k$ , so proceeding as above, we find that the probability that the mutant is still present at time  $t$ , assuming that at least one individual was present at time  $t = 0$  is approximately  $1 - \left(\frac{1 - R_m^0}{1 - R_m^0(1 - U_m^0(t))}\right)^r$ . Substituting this for  $\mathbb{P}\{I_m^n(t) > 0\}$  in (25) and differentiating as above gives us an auxiliary equation analogous to (32) for  $U^0(t)$ , the probability that the mutant fixes starting from standing variation:

$$\begin{aligned} \dot{U}^0 &= \mathbb{P}\{I_m^n(s) > 0\} \frac{d}{dt} \mathbb{P}\{I_w^n(s) = 0\} \\ &= nI_w(0)(\delta + \alpha_w + \gamma_w)U_w^0V_w^0(1 - U_w^0)^{nI_w(0)-1} \left(1 - \left(\frac{1 - R_m^0}{1 - R_m^0(1 - U_m^0)}\right)^r\right). \end{aligned}$$

518 As previously, we obtain  $P_{fix}^0 = \dot{U}^0(\infty)$  by choosing  $t$  sufficiently large that  $\dot{U}^0(t)$  equilibrates.

## 519 5.6 Stochastic simulations

520 We carried out stochastic simulations to check the validity of our results (see **Figure S1**). We used  
521 an individual-based simulation program for the Markov process described in **Table S1**. We start  
522 the simulation when the system is at its endemic equilibrium before vaccination given by equation  
523 (11) in section 5.1. Then we introduce a single host infected with the mutant pathogen at a time  
524  $t_m$  after the start of vaccination and we let the simulation run until one of the pathogen variants  
525 (the wild-type or the mutant) goes extinct. If the wild-type goes extinct first we record this run as  
526 a “mutant fixation event”. We ran 1000 replicates for each set of parameters and **Figure S1** plots  
527 the proportion of runs that led to mutant fixation. Simulation code is available upon request and  
528 will be deposited on zenodo after acceptance of the manuscript.

529

530 **Acknowledgements:** This work owes a lot to the input of Todd L. Parsons and we believe he  
531 should be considered as a co-author of the present paper. SG acknowledges support from the CNRS  
532 PEPS 2022 grant “VaxDurable”.

## 533 References

- 534 [1] Helen K Alexander and Sebastian Bonhoeffer. Pre-existence and emergence of drug resistance  
535 in a generalized model of intra-host viral dynamics. *Epidemics*, 4(4):187–202, 2012.
- 536 [2] Helen K Alexander, Guillaume Martin, Oliver Y Martin, and Sebastian Bonhoeffer. Evo-  
537 lutionary rescue: linking theory for conservation and medicine. *Evolutionary applications*,  
538 7(10):1161–1179, 2014.
- 539 [3] H. Andersson and T. Britton. *Stochastic Epidemic Models and their Statistical Analysis*,  
540 volume 151 of *Lecture notes in statistics*. Springer, New York, 2000.
- 541 [4] Graham Bell. Evolutionary rescue. *Annual Review of Ecology, Evolution, and Systematics*,  
542 48:605–627, 2017.
- 543 [5] Yuhua Cai and Stefan A. H. Geritz. Resident-invader dynamics of similar strategies in fluctu-  
544 ating environments. 2020.
- 545 [6] Philippe Carmona and Sylvain Gandon. Winter is coming: Pathogen emergence in seasonal  
546 environments. *PLoS computational biology*, 16(7):e1007954, 2020.
- 547 [7] Hélène Chabas, Sébastien Lion, Antoine Nicot, Sean Meaden, Stineke van Houte, Sylvain  
548 Moineau, Lindi M Wahl, Edze R Westra, and Sylvain Gandon. Evolutionary emergence of  
549 infectious diseases in heterogeneous host populations. *PLoS biology*, 16(9):e2006738, 2018.
- 550 [8] Sarah Cobey, Daniel B Larremore, Yonatan H Grad, and Marc Lipsitch. Concerns about  
551 sars-cov-2 evolution should not hold back efforts to expand vaccination. *Nature Reviews Im-*  
552 *munology*, pages 1–6, 2021.
- 553 [9] Nicholas G Davies, Sam Abbott, Rosanna C Barnard, Christopher I Jarvis, Adam J Kucharski,  
554 James D Munday, Carl AB Pearson, Timothy W Russell, Damien C Tully, Alex D Washburne,  
555 et al. Estimated transmissibility and impact of sars-cov-2 lineage b. 1.1. 7 in england. *Science*,  
556 372(6538), 2021.

- 557 [10] Troy Day, David A Kennedy, Andrew F Read, and Sylvain Gandon. The evolutionary epidemi-  
558 ology of pathogens during vaccination campaigns. *arXiv preprint arXiv:2109.13680*, 2021.
- 559 [11] Troy Day and Andrew F Read. Does high-dose antimicrobial chemotherapy prevent the evo-  
560 lution of resistance? *PLoS computational biology*, 12(1):e1004689, 2016.
- 561 [12] Saad-Roy et al. Epidemiological and evolutionary considerations of sars-cov-2 vaccine dosing  
562 regimes. *medRxiv*, 2020.
- 563 [13] S. Gandon and T. Day. The evolutionary epidemiology of vaccination. *J. Royal Soc. Interface*,  
564 4(16):803–817, 2007.
- 565 [14] Sylvain Gandon and Troy Day. Evidences of parasite evolution after vaccination. *Vaccine*,  
566 26:C4–C7, 2008.
- 567 [15] Sylvain Gandon and Sébastien Lion. Targeted vaccination and the speed of sars-cov-2 adap-  
568 tation. *medRxiv*, 2021.
- 569 [16] Sylvain Gandon, Margaret Mackinnon, Sean Nee, and Andrew Read. Imperfect vaccination:  
570 some epidemiological and evolutionary consequences. *Proceedings of the Royal Society of Lon-*  
571 *don. Series B: Biological Sciences*, 270(1520):1129–1136, 2003.
- 572 [17] S. A. H. Geritz. Resident-invader dynamics and the coexistence of similar strategies. *J. Math.*  
573 *Biol.*, 50(1):67–82, 2005.
- 574 [18] Philip J Gerrish, Fernando Saldana, Benjamin Galeota-Sprung, Alexandre Colato, Erika E  
575 Rodriguez, and Jorge X Velasco-Hernandez. How unequal vaccine distribution promotes the  
576 evolution of vaccine escape. *Available at SSRN 3827009*, 2021.
- 577 [19] Bryan Grenfell, Nicole Mideo, Laura C Pollitt, Andrew F Read, David L Smith, Claire Stan-  
578 dley, Nina Wale, Geoffrey Chi-Johnston, Ted Cohen, Troy Day, et al. The path of least  
579 resistance: aggressive or moderate. 2014.

- 580 [20] Bryan T Grenfell, Oliver G Pybus, Julia R Gog, James LN Wood, Janet M Daly, Jenny A  
581 Mumford, and Edward C Holmes. Unifying the epidemiological and evolutionary dynamics of  
582 pathogens. *science*, 303(5656):327–332, 2004.
- 583 [21] Matthew Hartfield and Samuel Alizon. Within-host stochastic emergence dynamics of immune-  
584 escape mutants. *PLoS computational biology*, 11(3):e1004149, 2015.
- 585 [22] Jan Humplik, Alison L Hill, and Martin A Nowak. Evolutionary dynamics of infectious diseases  
586 in finite populations. *Journal of theoretical biology*, 360:149–162, 2014.
- 587 [23] P. Jagers. Stabilities and instabilities in population dynamics. *J. Appl. Prob.*, pages 770–780,  
588 1992.
- 589 [24] D. G. Kendall. On the generalized “Birth-and-Death” process. *Ann. Math. Stat.*, 19(1):1–15,  
590 1948.
- 591 [25] David A Kennedy and Andrew F Read. Why does drug resistance readily evolve but vaccine re-  
592 sistance does not? *Proceedings of the Royal Society B: Biological Sciences*, 284(1851):20162562,  
593 2017.
- 594 [26] David A Kennedy and Andrew F Read. Why the evolution of vaccine resistance is less of a  
595 concern than the evolution of drug resistance. *Proceedings of the National Academy of Sciences*,  
596 115(51):12878–12886, 2018.
- 597 [27] John Frank Charles Kingman. *Poisson processes*, volume 3. Clarendon Press, 1992.
- 598 [28] Oleg Kogan, Michael Khasin, Baruch Meerson, David Schneider, and Christopher R My-  
599 ers. Two-strain competition in quasineutral stochastic disease dynamics. *Physical Review E*,  
600 90(4):042149, 2014.
- 601 [29] T. G. Kurtz. *Approximation of Population Processes*, volume 36. Society for Industrial and  
602 Applied Mathematics, Philadelphia, 1981.
- 603 [30] Amaury Lambert. Population dynamics and random genealogies. *Stochastic Models*,  
604 24(sup1):45–163, 2008.

- 605 [31] Gabriela Lobinska, Ady Pauzner, Arne Traulsen, Yitzhak Pilpel, and Martin A Nowak. Evo-  
606 lution of resistance to covid-19 vaccination with dynamic social distancing. *Nature human*  
607 *behaviour*, 6(2):193–206, 2022.
- 608 [32] Guillaume Martin, Robin Aguilée, Johan Ramsayer, Oliver Kaltz, and Ophélie Ronce. The  
609 probability of evolutionary rescue: towards a quantitative comparison between theory and  
610 evolution experiments. *Philosophical Transactions of the Royal Society B: Biological Sciences*,  
611 368(1610):20120088, 2013.
- 612 [33] Hamish McCallum, Nigel Barlow, and Jim Hone. How should pathogen transmission be mod-  
613 elled? *Trends in ecology & evolution*, 16(6):295–300, 2001.
- 614 [34] AngelaR McLean. After the honeymoon in measles control. *The Lancet*, 345(8945):272, 1995.
- 615 [35] David V McLeod, Lindi M Wahl, and Nicole Mideo. Mosaic vaccination: how distributing  
616 different vaccines across a population could improve epidemic control. *bioRxiv*, pages 2020–11,  
617 2021.
- 618 [36] T. L. Parsons, A. Lambert, T. Day, and S. Gandon. Pathogen evolution in finite populations:  
619 slow and steady spreads the best. *J. Royal Soc. Interface*, 15(147), 2018.
- 620 [37] Tadeas Priklopil and Laurent Lehmann. Invasion implies substitution in ecological communities  
621 with class-structured populations. 134:36–52, 2020.
- 622 [38] Jason W Rausch, Adam A Capoferri, Mary Grace Katusiime, Sean C Patro, and Mary F  
623 Kearney. Low genetic diversity may be an achilles heel of sars-cov-2. *Proceedings of the*  
624 *National Academy of Sciences*, 117(40):24614–24616, 2020.
- 625 [39] Andrew F Read, Troy Day, and Silvie Huijben. The evolution of drug resistance and the curi-  
626 ous orthodoxy of aggressive chemotherapy. *Proceedings of the National Academy of Sciences*,  
627 108(Supplement 2):10871–10877, 2011.
- 628 [40] Simon A Rella, Yuliya A Kulikova, Emmanouil T Dermitzakis, and Fyodor A Kondrashov.

- 629 Rates of sars-cov-2 transmission and vaccination impact the fate of vaccine-resistant strains.  
630 *Scientific Reports*, 11(1):1–10, 2021.
- 631 [41] Olivier Restif and Bryan T Grenfell. Vaccination and the dynamics of immune evasion. *Journal*  
632 *of the Royal Society Interface*, 4(12):143–153, 2007.
- 633 [42] Rafael Sanjuán, Miguel R Nebot, Nicola Chirico, Louis M Mansky, and Robert Belshaw. Viral  
634 mutation rates. *Journal of virology*, 84(19):9733–9748, 2010.
- 635 [43] Robin N Thompson, Edward M Hill, and Julia R Gog. Sars-cov-2 incidence and vaccine escape.  
636 *The Lancet Infectious Diseases*, 2021.
- 637 [44] Stineke van Houte, Alice KE Ekroth, Jenny M Broniewski, H el ene Chabas, Ben Ashby, Joseph  
638 Bondy-Denomy, Sylvain Gandon, Mike Boots, Steve Paterson, Angus Buckling, et al. The  
639 diversity-generating benefits of a prokaryotic adaptive immune system. *Nature*, 532(7599):385–  
640 388, 2016.
- 641 [45] Erik Volz, Swapnil Mishra, Meera Chand, Jeffrey C Barrett, Robert Johnson, Lily Geidelberg,  
642 Wes R Hinsley, Daniel J Laydon, Gavin Dabrera,  Aine O’Toole, et al. Assessing transmissibility  
643 of sars-cov-2 lineage b. 1.1. 7 in england. *Nature*, 593(7858):266–269, 2021.
- 644 [46] Pengfei Wang, Manoj S Nair, Lihong Liu, Sho Iketani, Yang Luo, Yicheng Guo, Maple Wang,  
645 Jian Yu, Baoshan Zhang, Peter D Kwong, et al. Antibody resistance of sars-cov-2 variants b.  
646 1.351 and b. 1.1. 7. *Nature*, pages 1–6, 2021.

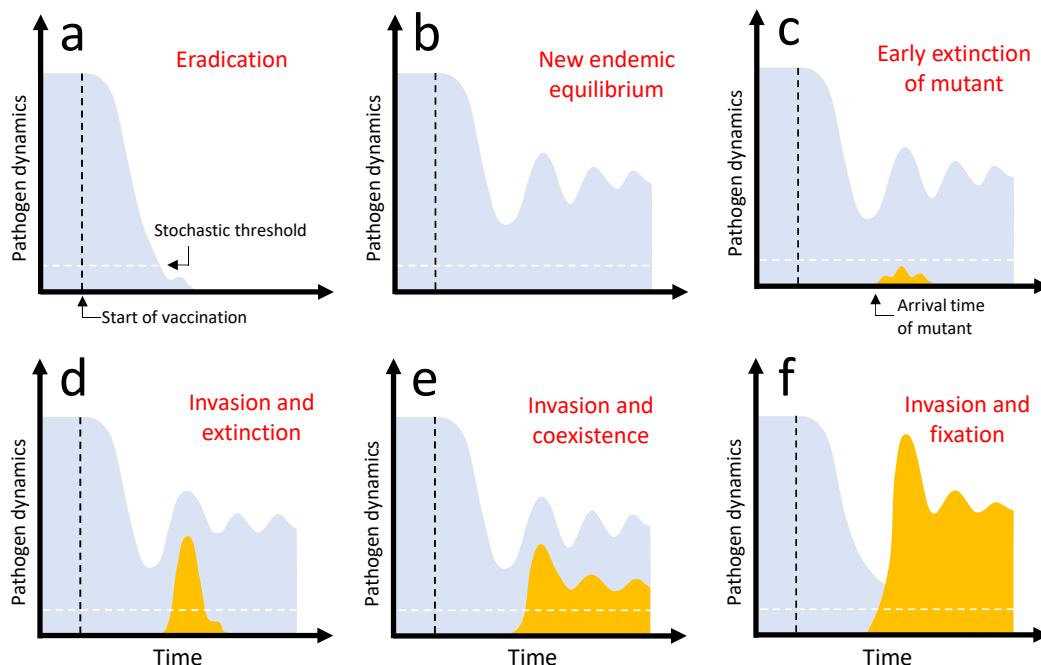

**Figure 1: Graphical representation of the different evolutionary epidemiology outcomes after vaccination.** The density of the wild-type pathogen is indicated in light blue and the dynamics of the mutant in orange. Each panel describes the temporal dynamics of the epidemics after the start of vaccination: (a) eradication of the wild-type pathogen, (b) new endemic equilibrium of the wild-type population after damped oscillations (with no introduction of the vaccine-adapted mutant), (c) early extinction of the vaccine-adapted mutant after its introduction by mutation, (d) invasion of the vaccine-adapted mutant followed by its extinction, (e) invasion of the vaccine-adapted mutant and long-term coexistence with the wild type in a new endemic equilibrium after damped oscillations, (f) invasion and fixation of the vaccine-adapted mutant (extinction of the wild type). Note that (b), (c) and (d) result to the same endemic equilibrium (wild-type population) after damped oscillations. The vertical dashed line (black) indicates the start of vaccination. For simplicity we consider that vaccination starts after the wild-type population has reached an endemic equilibrium. The horizontal dashed line indicates the “stochastic threshold” above which one may consider that the deterministic model provides a very good approximation of the dynamics and we can neglect the effect of demographic stochasticity.



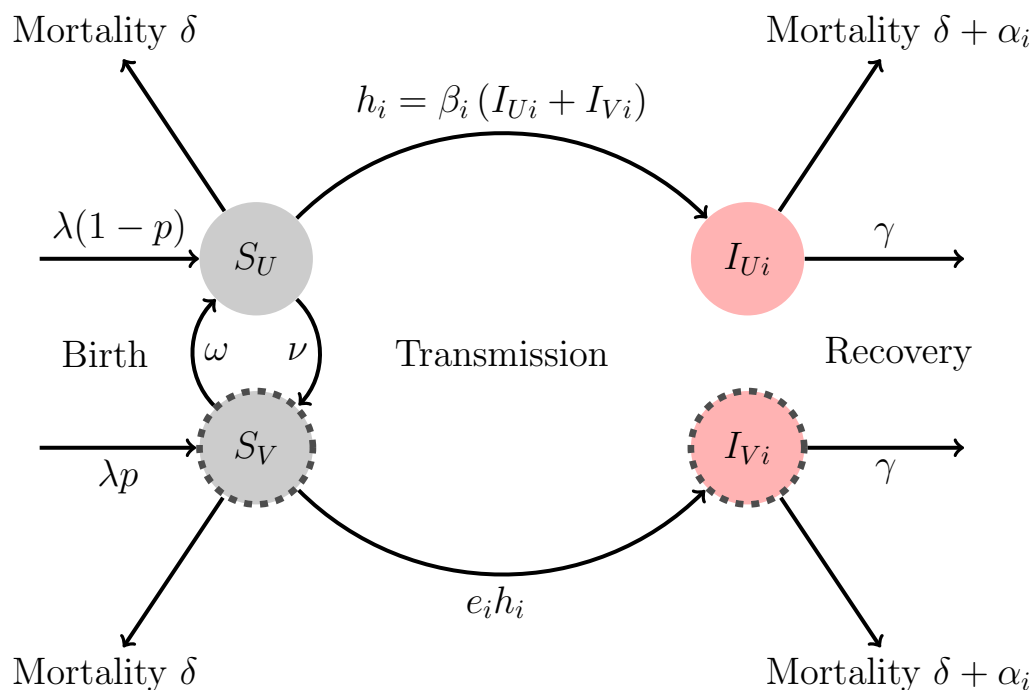

**Figure 2: A schematic representation of the model.** Naive and uninfected hosts ( $S_U$  hosts) are introduced at a rate  $\lambda$  and are vaccinated with probability  $p$  at birth and at rate  $\nu$  later on. Immunization induced by the vaccine wanes at rate  $\omega$ . Uninfected hosts ( $S_U$  and  $S_V$ ) die at a rate  $\delta$  while infected hosts ( $I_{U_i}$  and  $I_{V_i}$ ) die at a rate  $d_i = \delta + \alpha_i$ , where  $i$  refers to the virus genotype: the wild-type ( $i = w$ ) or the escape mutant ( $i = m$ ). The rate of infection of naive hosts by the genotype  $i$  is  $h_i = \beta_i(I_{U_i} + I_{V_i})$ , where  $\beta_i$  is the transmission rate of the genotype  $i$ . Vaccination reduces the force of infection and  $e_i$  refers to the ability of the genotype  $i$  to escape the immunity triggered by vaccination (we assume  $e_m > e_w$ ). A host infected by parasite genotype  $i$  recovers from the infection at rate  $\gamma_i$  and yields lifelong and perfect immunity ( $R$  hosts).  $N = S_U + S_V + \sum_i(I_{U_i} + I_{V_i}) + R$  is the total host population density.

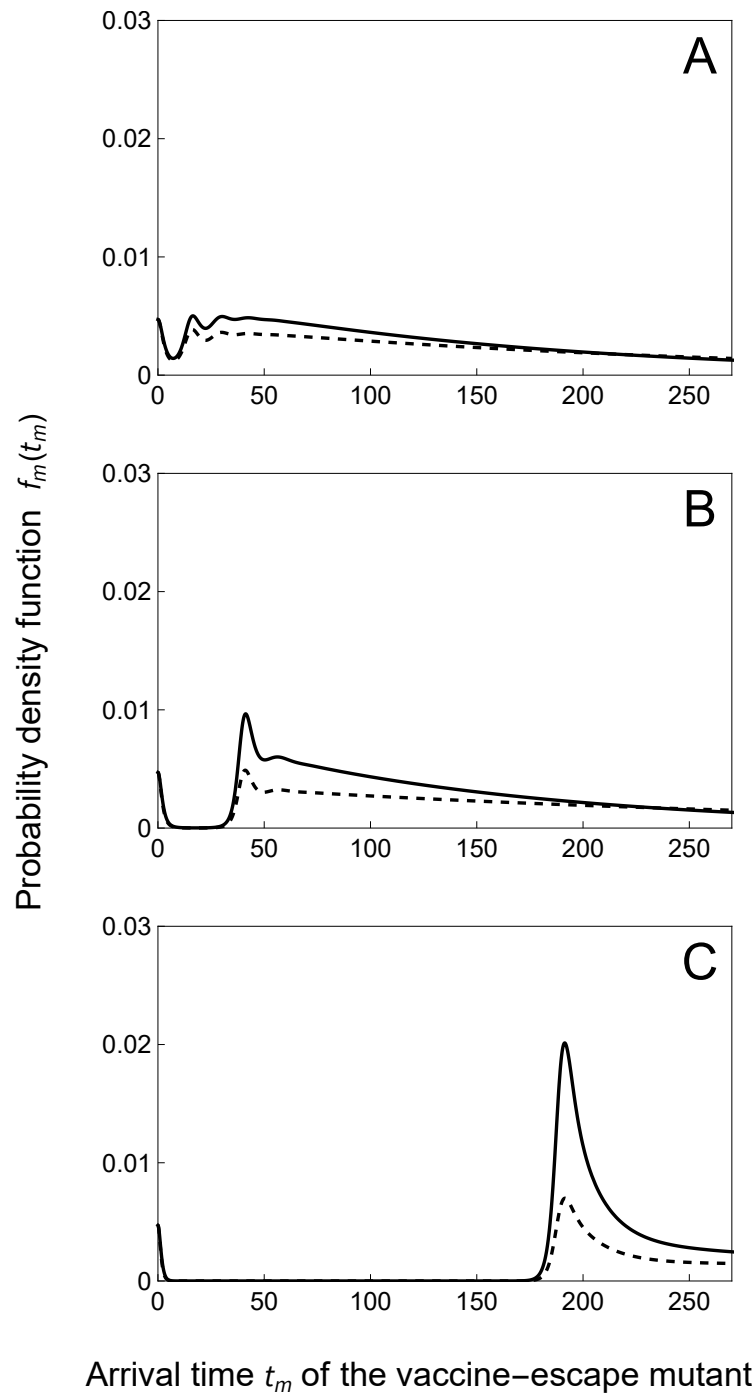

**Figure 3: Faster vaccine rollout delays the arrival time of the mutant.** We plot the probability density function  $f_m(t)$  of the arrival time of the mutant for different speeds of vaccination rollout:  $\nu = 0.1$  (top),  $0.2$  (middle) and  $0.3$  (bottom). We contrast a scenario where  $\theta_V = \theta_U$  (dashed line), and  $\theta_V = 10 \times \theta_U$  (full line). Other parameter values:  $\theta_U = 1$ ,  $\lambda = 0.01$ ,  $\delta = 0.01$ ,  $\gamma = 1$ ,  $\beta_w = 20$ ,  $\alpha_w = 1$ ,  $e_w = 0.03$ ,  $\omega = 0.05$ ,  $p = 0.1$ . For these parameter values the critical rate of vaccination  $\nu_c$  above which the wild-type pathogen is driven to extinction is  $\nu_c \approx 0.54$  (see equation (5)).

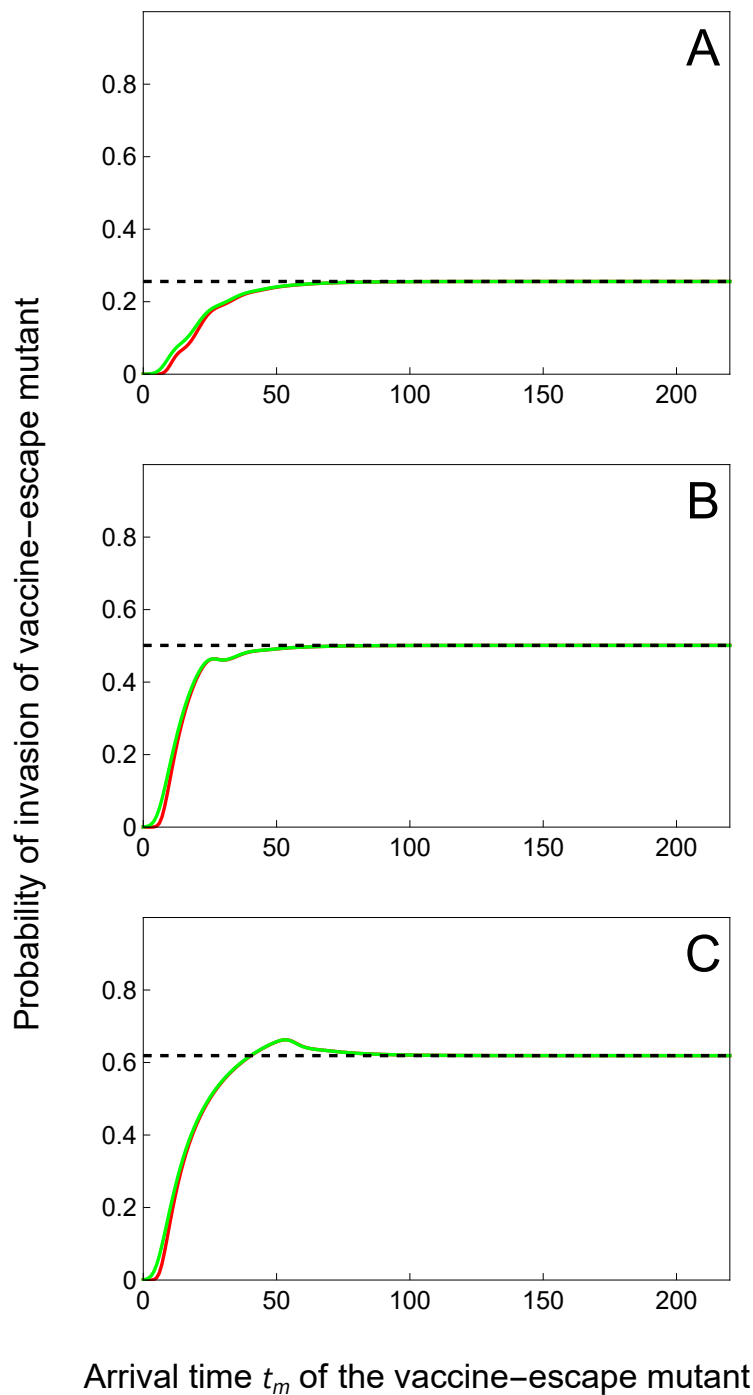

**Figure 4: Probability of invasion of the vaccine-escape mutant increases with  $t_m$ .** We plot the probability invasion  $P_m^{t_m}$  of a slow (green) and a fast (red) vaccine-escape mutant for different speeds of vaccination rollout:  $\nu = 0.1$  (top), 0.2 (middle) and 0.3 (bottom). The slow mutant:  $e_m = 1, \beta_m = 10, \alpha_m = 1$ . The fast mutant:  $e_m = 1, \beta_m = 30, \alpha_m = 5.02$ . The probability of invasion  $P_m^*$  in the limit  $t_m \rightarrow \infty$  (see equation (9)) is indicated with the dashed black line. Other parameter values:  $\lambda = 0.01, \delta = 0.01, \gamma = 1, \beta_w = 20, \alpha_w = 1, e_w = 0.03, \omega = 0.05, p = 0.1$ .

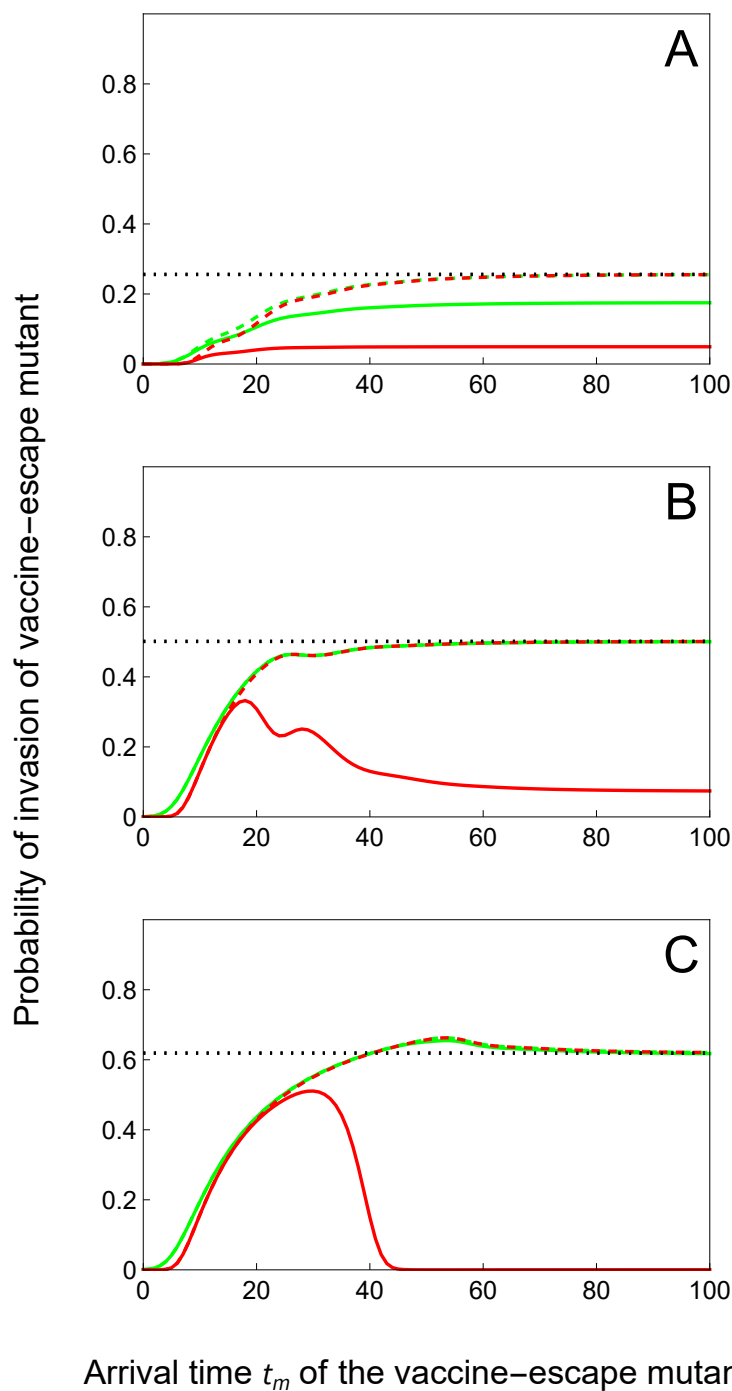

**Figure 5: Probability of fixation of the vaccine-escape mutant may be low when  $t_m$  is large.** We plot the probability of fixation of a slow (green) and a fast (red) vaccine-escape mutant for different speeds of vaccination rollout:  $\nu = 0.1$  (top),  $0.2$  (middle) and  $0.3$  (bottom). The slow mutant:  $e_m = 1, \beta_m = 10, \alpha_m = 1$ . The fast mutant:  $e_m = 1, \beta_m = 30, \alpha_m = 5.02$ . For comparison with **Figure 4** we plot the probability of invasion  $P_m^{t_m}$  with dashed colored lines and its asymptotic value  $P_m^*$  with a dashed black line. Other parameter values:  $\lambda = 0.01, \delta = 0.01, \gamma = 1, \beta_w = 20, \alpha_w = 1, e_w = 0.03, \omega = 0.05, p = 0.1, n = 10^8$ .

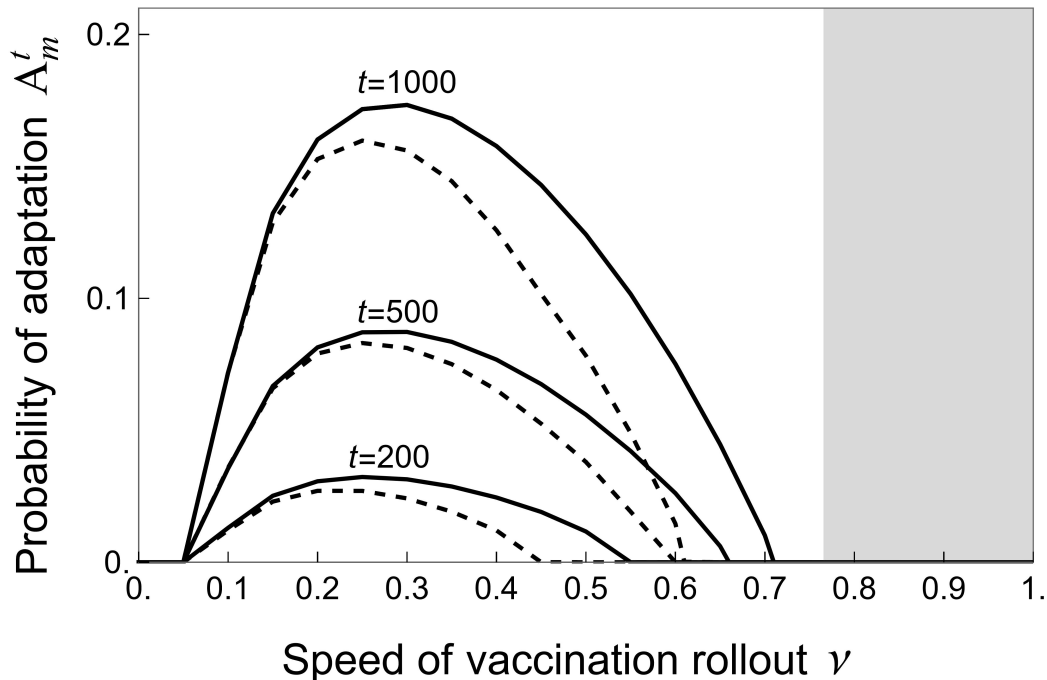

**Figure 6: Probability of adaptation and the speed of vaccination rollout.** We plot the probability of adaptation  $A_m^t$  of a vaccine-escape mutant against the speed of vaccination rollout for different values of time  $t$  (black line). The dashed line indicates the probability of adaptation when we impose periodic fluctuations in  $c(t)$  which measures the intensity of Non-Pharmaceutical Interventions (NPIs) that reduce the transmission rate of all pathogens by  $1 - c(t)$ . Here we use a square wave function for  $c(t)$  that fluctuates between 0.2 and 0 with a period  $T = 200$ . These NPIs affect both the flux of mutations (**Figure S3**) and the probability of invasion (**Figure S4**). The light gray area on the right-hand-side indicates the speed above which the wild-type pathogen is expected to be driven to extinction ( $\nu > \nu_c$ ). In the absence of NPIs the critical rate of vaccination  $\nu_c$  above which the wild-type pathogen is driven to extinction is  $\nu_c \approx 0.77$  (see equation (5)). Parameter values:  $\lambda = 0.01$ ,  $\delta = 0.01$ ,  $\gamma = 1$ ,  $\beta_w = 20$ ,  $\alpha_w = 1$ ,  $e_w = 0.03$ ,  $\beta_m = 10$ ,  $\alpha_m = 1$ ,  $e_m = 1$ ,  $\omega = 0.05$ ,  $p = 0$ ,  $\theta_V = \theta_U = 0.1$ .

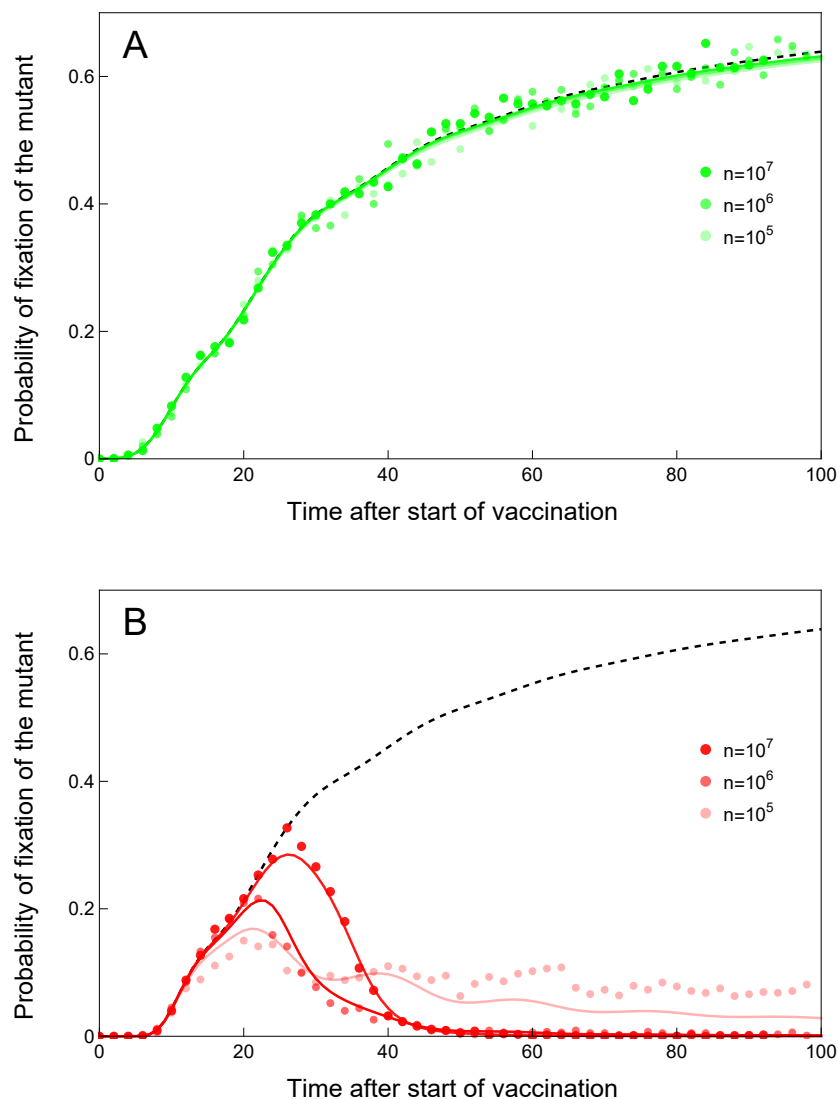

**Figure S1: Numerical computation of the probability of fixation agrees well with individual-based stochastic simulations.** In (A) we consider a scenario where the vaccine-escape mutant is a slow strain (in green:  $e_m = 1, \beta_m = 10, \alpha_m = 1$ ) and in (B) the vaccine-escape mutant is a fast strain (in red:  $e_m = 1, \beta_m = 30, \alpha_m = 5.02$ ). We plot the probability of invasion (dashed black line) and the probability of fixation computed numerically (full line) and obtained from stochastic simulations (dots). The intensity of the colors (from light to dark) indicate increasing values of the system size :  $n = 10^5$  (light),  $10^6$  (intermediate) and  $10^7$  (dark). Other parameter values:  $\lambda = 0.01, \delta = 0.01, \gamma = 1, \beta_w = 20, \alpha_w = 1, e_w = 0, \omega = 0, \nu = 0, p = 0.5$ .

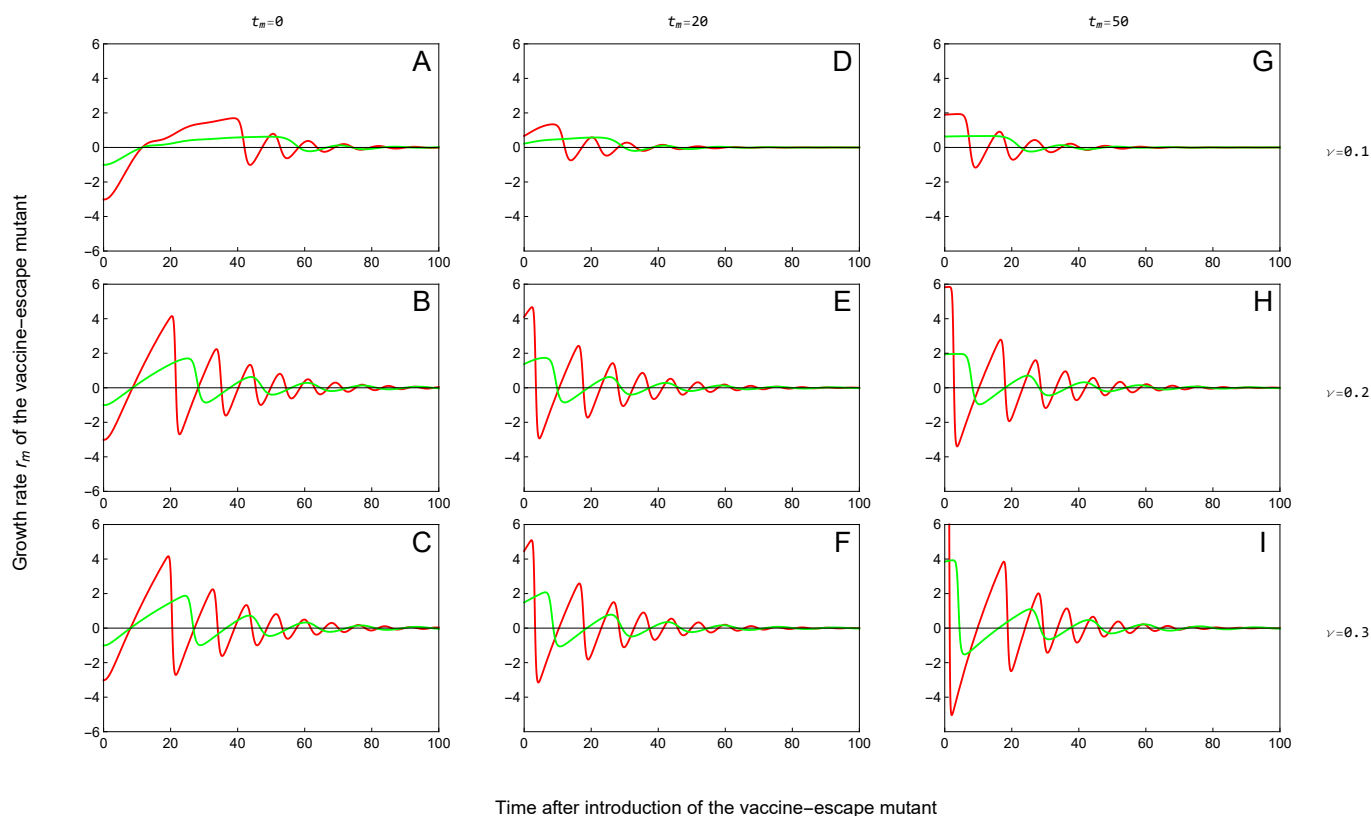

**Figure S2: Fluctuations of the per-capita growth rate of the vaccine-escape mutant  $r_m$  for different introduction times  $t_m$ .** We plot the per-capita growth rate of the vaccine-escape mutant  $r_m$  of a slow (green) and a fast (red) vaccine-escape mutant for different speeds of vaccination rollout:  $\nu = 0.1$  (top),  $0.2$  (middle) and  $0.3$  (bottom). We also vary the introduction time  $t_m$ :  $t_m = 0$  (left column),  $20$  (middle column) and  $50$  (right column). The slow mutant:  $e_m = 1$ ,  $\beta_m = 10$ ,  $\alpha_m = 1$ . The fast mutant:  $e_m = 1$ ,  $\beta_m = 30$ ,  $\alpha_m = 5.02$ . Other parameter values:  $\lambda = 0.01$ ,  $\delta = 0.01$ ,  $\gamma = 1$ ,  $\beta_w = 20$ ,  $\alpha_w = 1$ ,  $e_w = 0.03$ ,  $\omega = 0.05$ ,  $p = 0.1$ .

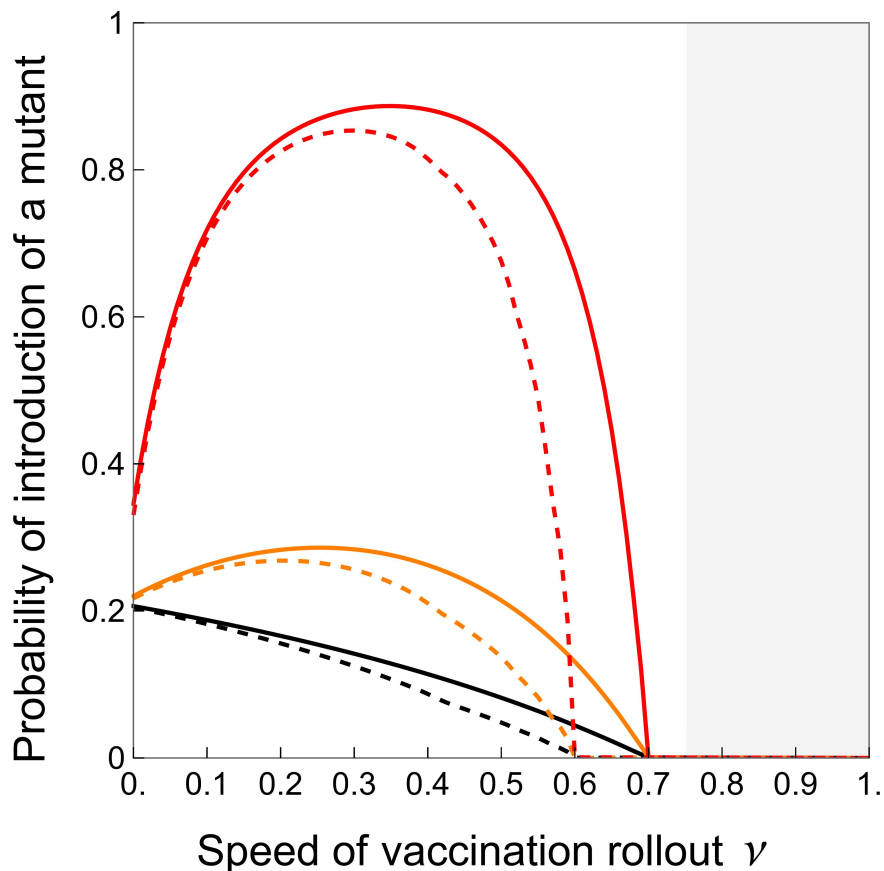

**Figure S3: The speed of vaccination rollout affects the probability of introduction of a vaccine-adapted variant by mutation (with or without NPI).** We plot the probability that the first vaccine-escape variant is introduced by mutation before  $t = 1000$ :  $\int_0^{1000} f_m(s) ds$ . We consider three different values of mutation  $\theta_V$ :  $\theta_V = 0.05$  (black),  $\theta_V = 0.5$  (orange),  $\theta_V = 5$  (red). The gray area indicates the parameter region where vaccination leads to pathogen eradication (i.e.,  $\nu > \nu_c$ ). The dashed lines correspond to a scenario where we impose periodic fluctuations in  $c(t)$ , which measures the intensity of Non-Pharmaceutical Interventions (NPIs) that reduce the transmission rate of all pathogens by a fraction  $1 - c(t)$ . Here we use a square wave function for  $c(t)$  that fluctuates between 0.2 and 0 with a period  $T = 200$ . Other parameter values:  $\theta_U = 0.05$ ,  $\lambda = 0.01$ ,  $\delta = 0.01$ ,  $\gamma = 1$ ,  $\beta_w = 20$ ,  $\alpha_w = 1$ ,  $\omega = 0.05$ ,  $e_w = 0.03$ ,  $p = 0.1$ . For these parameter values  $\nu_c \approx 0.75$ .



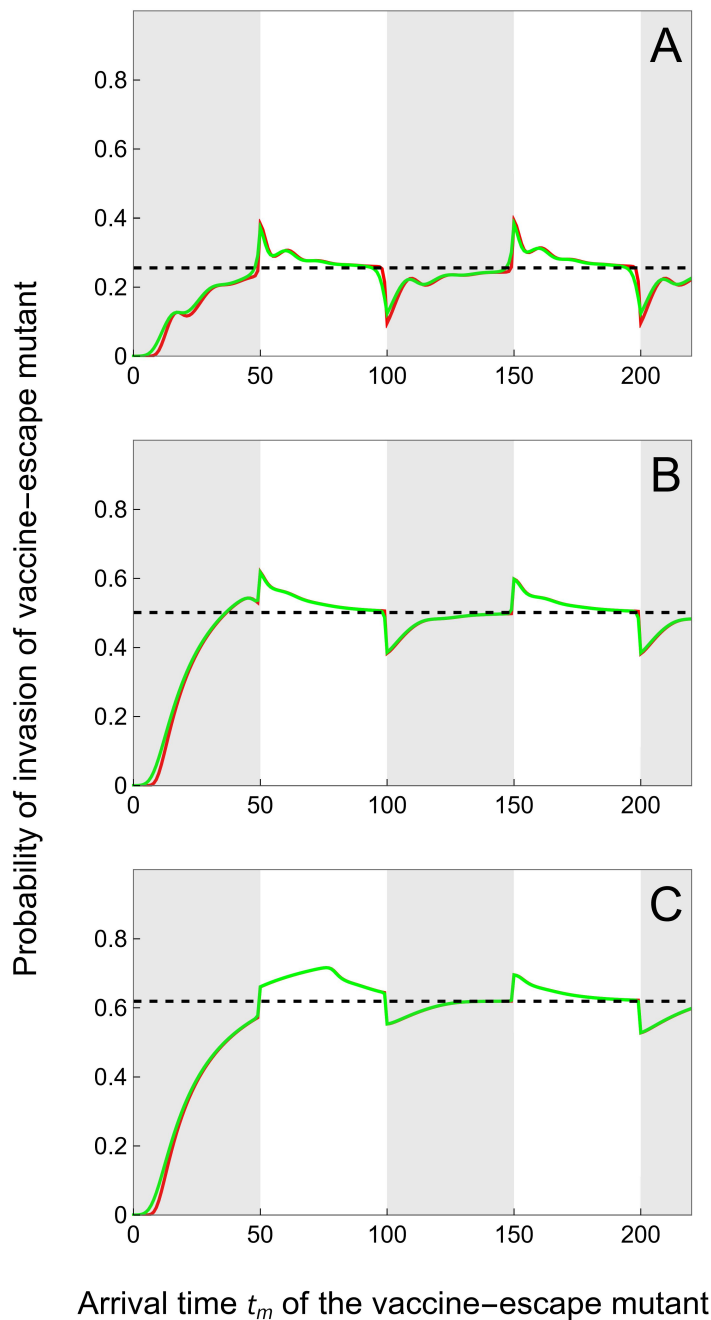

**Figure S4: Probability of invasion of the vaccine-escape mutant increases with  $t_m$  with NPI.** As in **Figure 4** we plot the probability of invasion  $P_m^{t_m}$  of a slow (green) and a fast (red) vaccine-escape mutant for different speeds of vaccination rollout:  $\nu = 0.1$  (top),  $0.2$  (middle) and  $0.3$  (bottom). Here we use a square wave function for  $c(t)$  that fluctuates between  $0.2$  (light gray shading) and  $0$  (no shading) with a period  $T = 100$ . The slow mutant:  $e_m = 1, \beta_m = 10, \alpha_m = 1$ . The fast mutant:  $e_m = 1, \beta_m = 30, \alpha_m = 5.02$ . The probability of invasion  $P_m^*$  in the limit  $t_m \rightarrow \infty$  (see equation (9)) is indicated with the dashed black line. Other parameter values:  $\lambda = 0.01, \delta = 0.01, \gamma = 1, \beta_w = 20, \alpha_w = 1, e_w = 0.03, \omega = 0.05, p = 0.1$ .
