# The speed of vaccination rollout and the risk of pathogen adaptation

Sylvain Gandon<sup>1,\*</sup>, Amaury Lambert<sup>2,3</sup>, Marina Voinson<sup>1</sup>, Troy Day<sup>4,5</sup>, and Todd L. Parsons<sup>6</sup>

<sup>1</sup>CEFE, CNRS, Univ Montpellier, EPHE, IRD, Montpellier, France

\*Corresponding author

<sup>2</sup>Institut de Biologie de l'ENS (IBENS), École Normale Supérieure (ENS), CNRS UMR 8197, Paris, France

<sup>3</sup>Center for Interdisciplinary Research in Biology (CIRB), Collège de France, CNRS UMR 7241, INSERM U1050, PSL Research University, Paris, France

<sup>4</sup>Department of Mathematics and Statistics, Queen's University, Kingston, Canada

<sup>5</sup>Department of Biology, Queen's University, Kingston, Canada

<sup>6</sup>Laboratoire de Probabilités, Statistique et Modélisation (LPSM), Sorbonne Université, CNRS UMR 8001, Paris, France

Monday 15<sup>th</sup> July, 2024

E-mails: SG - [sylvain.gandon@cefe.cnrs.fr](mailto:sylvain.gandon@cefe.cnrs.fr); AL - [amaury.lambert@ens.fr](mailto:amaury.lambert@ens.fr); MV - [marina.voinson@hotmail.com](mailto:marina.voinson@hotmail.com);  
TD - [tday@mast.queensu.ca](mailto:tday@mast.queensu.ca); TLP - [todd.parsons@upmc.fr](mailto:todd.parsons@upmc.fr);

Keywords: evolutionary epidemiology, vaccination, life-history evolution, demographic stochasticity, virulence, adaptive dynamics

## Abstract

Vaccination is expected to reduce disease prevalence and to halt the spread of epidemics. But pathogen adaptation may erode the efficacy of vaccination and challenge our ability to control disease spread. Here we examine the influence of the speed of vaccination rollout on the overall risk of pathogen adaptation to vaccination. We extend the framework of evolutionary epidemiology theory to account for the different steps leading to adaptation to vaccines: (1) introduction of a vaccine-escape variant by mutation from an endemic wild-type pathogen, (2) invasion of this vaccine-escape variant in spite of the risk of early extinction, (3) spread and, eventually, fixation of the vaccine-escape variant in the pathogen population. We show that the risk of pathogen adaptation is maximal for an intermediate speed of vaccination rollout. On the one hand, slower rollout decreases pathogen adaptation because selection is too weak to avoid early extinction of the new variant. On the other hand, faster rollout decreases pathogen adaptation because it reduces the influx of adaptive mutations. Hence, vaccinating faster is recommended to decrease both the number of cases and the likelihood of pathogen adaptation. We also show that pathogen adaptation is driven by its basic reproduction ratio, the efficacy of the vaccine and the effects of the vaccine-escape mutations on pathogen life-history traits. Accounting for the interplay between epidemiology, selection and genetic drift, our work clarifies the influence of vaccination policies on different steps of pathogen adaptation and allows us to anticipate the effects of public-health interventions on pathogen evolution.

**Significance statement:** Pathogen adaptation to host immunity challenges the efficacy of vaccination against infectious diseases. Are there vaccination strategies that limit the emergence and the spread of vaccine-escape variants? Our theoretical model clarifies the interplay between the timing of vaccine escape mutation events and the transient epidemiological dynamics following the start of a vaccination campaign on pathogen adaptation. We show that the risk of adaptation is maximized for intermediate vaccination coverage but can be reduced by a combination of non pharmaceutical interventions and faster vaccination rollout.

## 21 1 Introduction

22 Vaccination offers unique opportunities to protect a large fraction of the host population and  
23 thus to control spreading epidemics. In principle, comprehensive vaccination coverage can lead to  
24 pathogen eradication. In practice, however, the coverage required for eradication is often impossible  
25 to reach with imperfect vaccines [22, 45]. Moreover, pathogen adaptation may erode the efficacy  
26 of vaccination. Even if adaptation to vaccines is less common than adaptation to drugs [20, 35, 36]  
27 the spread of vaccine-escape mutations may challenge our ability to halt the spread of epidemics.

28 Understanding the dynamics of pathogen adaptation to vaccines is particularly relevant  
29 in the control of the ongoing SARS-CoV-2 pandemic. Yet, most theoretical studies that explore  
30 the evolution of pathogens after vaccination are based on the analysis of deterministic models and  
31 ignore the potential effects induced by the stochasticity of epidemiological dynamics. Demographic  
32 stochasticity, however, drives the intensity of genetic drift and can affect the establishment of  
33 new mutations and the long-term evolution of pathogens [55, 58, 54]. Several studies showed  
34 how the demographic stochasticity induced by finite host and pathogen population sizes alters  
35 selection on the life-history traits of pathogens [39, 32, 49]. These analytical predictions rely on the  
36 assumption that the rate of pathogen mutation is low, which allows us to decouple epidemiological  
37 and evolutionary time scales. Indeed, when the influx of new mutations is low, the new strain  
38 is always introduced after the resident pathogen population has reached its endemic equilibrium.  
39 Many pathogens, however, have relatively high mutation rates [57] and the fate of a pathogen  
40 mutant introduced away from the endemic equilibrium is likely to be affected by the dynamics  
41 of the pathogen populations. Moreover, the start of a vaccination campaign is expected to yield  
42 massive perturbations of the epidemiological dynamics and new mutations are likely to appear  
43 when the pathogen population is far from its endemic equilibrium.

44 The aim of the present study is to develop a versatile theoretical framework to evaluate  
45 the consequences of vaccination on the risk of pathogen adaptation to vaccination. There are six  
46 main evolutionary-epidemiological outcomes after the start of vaccination which are summarized  
47 in **Figure 1**. Some of these outcomes are more favorable than others because they do not lead to

48 the invasion of a new variant (**Figure 1a-c**). In contrast, vaccination may result in the invasion of  
49 vaccine-escape variants (**Figure 1e-f**). In the following we use a combination of deterministic and  
50 branching process approximations to study the joint epidemiological and evolutionary dynamics  
51 of the pathogen population. This analysis reveals the importance of the speed of the vaccination  
52 rollout as well as of the life-history characteristics of the vaccine-escape variants on the probability  
53 of pathogen adaptation.

## 54 2 Model

55 We use a classical SIR epidemiological model with vital dynamics (*i.e.*, host births and deaths) [31],  
56 where hosts can be susceptible, infected or recovered [37], and are either vaccinated or unvaccinated.  
57 A host may be infected by one of two strains: a resident wild-type, or a novel mutant (we assume  
58 co-infections are not possible).

59 We consider a continuous-time Markov process tracking the *number* of individuals of each  
60 type of host (see Table 1 for a detailed description). Rates are interpreted as probabilities per  
61 unit time. We incorporate vital dynamics by assuming that all hosts have a base mortality rate  
62 of  $\delta$ , while new susceptible hosts are recruited at rate  $\nu n$ . Here,  $n$  is a “system size”, or scaling  
63 parameter, that indicates the order of magnitude of the arena in which the epidemic occurs: the  
64 total host population varies stochastically in time, but remains of the order of  $n$ . We track the  
65 numbers of two classes of susceptible hosts, unvaccinated,  $u$ , or vaccinated,  $v$ ,  $(S_u^n, S_v^n)$ , four classes  
66 of unvaccinated and vaccinated individuals, infected with the wild-type,  $w$ ,  $(I_{uw}^n, I_{vw}^n)$  or with a  
67 mutant strain,  $m$ ,  $(I_{um}^n, I_{vm}^n)$ , and the number recovered,  $R^n$ . The total number susceptible is thus  
68  $S^n = S_u^n + S_v^n$ , while the number of infected hosts is  $I^n = \sum_{i \in \{w, m\}} I_{ui}^n + I_{vi}^n$ . We write  $H^n$  for the  
69 total number of hosts:

$$H^n = S^n + I^n + R^n. \quad (1)$$

70 Vaccination is assumed to take place at a constant rate  $v$  for all susceptible hosts. The  
71 immunity triggered by vaccination is assumed to wane at rate  $\omega_v$ , and natural (*i.e.*, infection-

72 induced) immunity is assumed to wane at rate  $\omega_r$ . Recovered individuals are assumed to be fully  
73 protected (no reinfections) because natural immunity is expected to be more effective than immunity  
74 triggered by vaccination (*e.g.*, this is believed to be true for measles [8] and influenza [38, 12, 61]  
75 but not necessarily for SARS-CoV-2 [26]). We further assume that the virulence  $\alpha_i$  (the mortality  
76 rate induced by the infection), the transmission  $\beta_i$  (the production rate of new infections), and the  
77 recovery  $\gamma_i$  (the rate at which the host clears the infection) are fully governed by the pathogen  
78 genotype ( $i = w$  or  $m$ ). A fourth trait,  $\epsilon_i \in [0, 1]$ , governs the infectivity of pathogen genotype  $i$  on  
79 vaccinated hosts (infectivity of all genotypes is assumed to be equal to 1 on unvaccinated hosts). In  
80 other words, this final trait measures the ability of the pathogen to escape the immunity triggered  
81 by the vaccine. Note that these assumptions allow us to aggregate infected hosts irrespective  
82 of their vaccination status, which simplifies the analysis below. We assume frequency-dependent  
83 transmission where the number of contacts a host may have in the population is constant, but a  
84 proportion of those contacts may be infectious. Note, however, that other forms of transmission  
85 (*e.g.*, density-dependent transmission [44]) are expected to yield qualitatively similar results. We  
86 summarize the states of the process and the jump rates at which individuals transition between  
87 states in **Table 1** and in **Figure 2**.

88 We use this model to examine the epidemiological and evolutionary dynamics following  
89 the start of a vaccination campaign. For the sake of simplicity, we focus our analysis on scenarios  
90 where the pathogen population has reached an endemic equilibrium before the start of vaccination.  
91 This is a strong assumption, but our aim in this study is to focus on a scenario where the initial  
92 epidemiological state of the system is fixed to understand the stochastic fate of vaccine escape  
93 mutations during the transient epidemiological dynamics of the pathogen population following the  
94 start of the vaccination campaign. This is a necessary first step before studying more complex  
95 scenarios where vaccination starts before the epidemic has reached an endemic equilibrium. The  
96 default parameter values used to explore numerically the dynamics of viral adaptation are consistent  
97 with a broad range of acute infections of humans (*e.g.*, SARS-CoV, Influenza, Measles, see **Table**  
98 **SI.1**). In the Discussion, we explore the robustness of our results after relaxing some of our  
99 simplifying assumptions.

## 100 **3 Results**

### 101 **3.1 Two Approximations**

102 Following [48], our analysis makes use of two approximations to our Markov process model. The  
103 first, deterministic approximation, uses ordinary differential equations (ODEs) and is appropriate  
104 when all types of host are abundant, but fails to correctly capture the dynamics when one or more  
105 types is rare (*e.g.*, at the time of introduction of the mutant strain). The second uses a birth-and-  
106 death process (see *e.g.*, [6]) to approximate rare quantities and captures stochastic phenomena, like  
107 extinction.

#### 108 **3.1.1 Deterministic Approximation**

109 For our first, deterministic approximation, we work with host densities defined by

$$X_i^n = S_i^n/n, \quad Y_{ij}^n = I_{ij}^n/n, \quad \text{and} \quad Z^n = R^n/n. \quad (2)$$

110 ( $i = u, v, j = w, m$ ) and set

$$N^n = H^n/n = \sum_{i \in \{u, v\}} X_i^n + \sum_{\substack{i \in \{u, v\} \\ j \in \{w, m\}}} Y_{ij}^n + Z^n. \quad (3)$$

111 As  $n$  becomes large, the changes in the densities due to jumps in the Markov chain become  
112 smaller and smaller. As  $n \rightarrow \infty$ , the  $X_i^n$ ,  $Y_{ij}^n$ , and  $Z^n$  approach limits  $X_i$ ,  $Y_{ij}$ , and  $Z$ . These limits

113 obey a system of ordinary differential equations:

$$\begin{aligned}
 \dot{X}_u &= \nu + \omega_v X_v + \omega_r Z - \left( \beta_w \frac{Y_{uw} + Y_{vw}}{N} + \beta_m \frac{Y_{um} + Y_{vm}}{N} + \delta + v \right) X_u \\
 \dot{X}_v &= v X_u - \left( \epsilon_w \beta_w \frac{Y_{uw} + Y_{vw}}{N} + \epsilon_m \beta_m \frac{Y_{um} + Y_{vm}}{N} + \delta + \omega_v \right) X_v \\
 \dot{Y}_{uw} &= \beta_w (Y_{uw} + Y_{vw}) \frac{X_u}{N} - (\delta + \alpha_w + \gamma_w) Y_{uw} \\
 \dot{Y}_{um} &= \beta_m (Y_{um} + Y_{vm}) \frac{X_u}{N} - (\delta + \alpha_m + \gamma_m) Y_{um} \\
 \dot{Y}_{vw} &= \epsilon_w \beta_w (Y_{uw} + Y_{vw}) \frac{X_v}{N} - (\delta + \alpha_w + \gamma_w) Y_{vw} \\
 \dot{Y}_{vm} &= \epsilon_m \beta_m (Y_{um} + Y_{vm}) \frac{X_v}{N} - (\delta + \alpha_m + \gamma_m) Y_{vm} \\
 \dot{Z} &= (\gamma_w Y_{uw} + \gamma_w Y_{vw} + \gamma_m Y_{um} + \gamma_m Y_{vm}) - (\delta + \omega_r) Z,
 \end{aligned} \tag{4}$$

114 This corresponds to replacing discrete individuals by continuous densities and interpreting the  
 115 rates in **Figure 2** as describing continuous flows rather than jumps (see Example B on p. 453 and  
 116 Theorem 11.2.1 on p. 456 in [18] for the details and proofs of this approximation; [4] gives a readable  
 117 summary with an epidemiological focus).

118 It is also convenient to track the dynamics of the total density of hosts infected with the  
 119 same strain  $i$ ,  $Y_i := Y_{ui} + Y_{vi}$ , which yields:

$$\dot{Y}_i = \underbrace{\left( \left( \beta_i \frac{X_u}{N} + \epsilon_i \beta_i \frac{X_v}{N} \right) - (\delta + \alpha_i + \gamma_i) \right)}_{r_i = \text{growth rate of strain } i} Y_i \tag{5}$$

120 The ability of the strain  $i$  to grow is given by the sign of the growth rate  $r_i$ . Note that this  
 121 growth rate depends on the four different traits of the pathogen:  $\alpha_i, \beta_i, \gamma_i, \epsilon_i$ . The growth rate also  
 122 depends on the densities  $X_u(t)$  and  $X_v(t)$ , which vary with  $t$ , the time since the start of vaccination  
 123 (*i.e.*, vaccination starts at  $t = 0$ ). For simplicity, we assume that at time  $t = 0$ , the wild-type is at  
 124 its endemic equilibrium (see (SI.1) in the Supplementary Information for details), and that there  
 125 are no mutants (we relax this assumption in the Supplementary Information §5).

126 The coefficient of selection  $s_m(t)$  on the mutant strain relative to the wild-type is:

$$s_m(t) = r_m(t) - r_w(t) = (\beta_m - \beta_w) \frac{X_u(t)}{N(t)} + (\epsilon_m \beta_m - \epsilon_w \beta_w) \frac{X_v(t)}{N(t)} - (\alpha_m - \alpha_w + \gamma_m - \gamma_w) \quad (6)$$

127 In other words, both the genetics (the phenotypic traits of strain  $i$ ) and the environment (the  
128 epidemiological state of the host population) govern selection and strain dynamics.

129 **Pathogen eradication and vaccination threshold** The ability of the strain  $i$  to grow can be  
130 measured by its effective per-generation reproduction ratio which is given by:

$$\mathcal{R}_i^e(t) = \mathcal{R}_i \left( \frac{X_u(t)}{N(t)} + \epsilon_i \frac{X_v(t)}{N(t)} \right) \quad (7)$$

131 where  $\mathcal{R}_i = \frac{\beta_i}{\delta + \alpha_i + \gamma_i}$ ,  $i = m, w$ . Hence, a reduction of the availability of susceptible hosts with  
132 vaccination may drive down the density of the wild-type pathogen when the production of new  
133 infected hosts (infection “birth”) does not compensate for the recovery and death of infected hosts  
134 (infection “death”), that is, when  $\mathcal{R}_w^e < 1$ . Ultimately, vaccination can even lead to the eradication  
135 of the wild-type pathogen (**Figure 1a**) either when the vaccine is sufficiently efficient ( $\epsilon_w \mathcal{R}_w < 1$ )  
136 or when the vaccination coverage is sufficiently high [45, 22].

137 Interestingly, if the aim is to eradicate an already established disease, bringing the repro-  
138 duction number of the wild-type strain at the disease free equilibrium below one, (*i.e.*,  $\mathcal{R}_w^\emptyset < 1$  see  
139 (SI.3)), may not be sufficient to do so. Indeed, as pointed out by several earlier studies [41, 28],  
140 imperfect vaccination may yield backward bifurcation at the disease free equilibrium. In this case,  
141 the pathogen may persist even when vaccination brings  $\mathcal{R}_w^\emptyset$  below one. Yet, the analysis of our  
142 model indicates that the condition for the emergence of backward bifurcation are very limited (see  
143 Supplementary Information §1.3) and in the following we use the condition  $\mathcal{R}_w^\emptyset < 1$  to identify  
144 the critical rate  $v_c$  of the speed of vaccination rollout above which the wild-type pathogen can be  
145 driven to extinction (see Supplementary Information §1.3):

$$v_c = \frac{(\mathcal{R}_w - 1)(\delta + \omega_v)}{1 - \mathcal{R}_w \epsilon_w} \quad (8)$$



146 As expected, better vaccines (*i.e.*, lower values of  $\epsilon_w$  and  $\omega_v$ ) yield lower threshold values  
147 for the speed of vaccination. Imperfect vaccines (*i.e.*, higher values of  $\epsilon_w$  and  $\omega_v$ ), in contrast,  
148 are unlikely to allow eradication. Note that, if we wait sufficiently long, the population of the  
149 wild-type pathogen will be driven to extinction by *stochastic* fluctuations even when  $v < v_c$  [3, 29].  
150 Indeed, in a finite host population, sooner or later, the pathogen population is doomed to go extinct  
151 because of demographic stochasticity, but the extinction time when  $v < v_c$  will usually be very long,  
152 increasing exponentially with the system size  $n$  [59, 5, 47]. From now on, we neglect the possibility  
153 of extinction of the wild-type due to vaccination when  $v < v_c$  (which is a good approximation when  
154  $n$  is large).

155 The spread of a new pathogen variant may erode the efficacy of vaccination and, conse-  
156 quently, could affect the ability to control and, ultimately, to eradicate the pathogen. However,  
157 before the replacement of the wild-type by a vaccine-escape variant the pathogen population may  
158 go through three steps that may ultimately result (or not) in pathogen adaptation: (1) introduction  
159 of the vaccine-escape variant by mutation, (2) extinction (**Figure 1c**) or invasion (**Figure 1d-f**)  
160 of the vaccine-escape variant introduced by mutation, (3) fixation (**Figure 1f**) or not (**Figure**  
161 **1d-e**) of the invading vaccine-escape variant. Each of these steps is very sensitive to demographic  
162 stochasticity because the number of vaccine-escape variants is very small in the early phase of its  
163 emergence. This motivates our second approximation, below.

### 164 3.1.2 Birth-and-Death Process Approximation

165 Suppose that a mutant strain appears at time  $t_{\text{int}} \geq 0$  in a single infected host,  $I_m^n(t_{\text{int}}) = 1$ ,  
166 that is, with density  $Y_m^n(t_{\text{int}}) = \frac{1}{n}$ . Taking  $n \rightarrow \infty$ , we get  $Y_m(t_{\text{int}}) = 0$ . Using this as an initial  
167 condition in (4), we find that  $Y_m(t) \equiv 0$  for all  $t \geq t_{\text{int}}$ . This does not mean that the mutant is  
168 absent, but is simply not yet sufficiently abundant to be visible at the coarse resolution of the ODE  
169 approximation, (4). In particular, while rare, the mutant strain does not have a detectable effect  
170 on the density of susceptible hosts.

171 To account for the rare mutant, we use (4) to define a birth-and-death process,  $\tilde{I}_m(t)$ , that

172 approximates the *number* of individuals infected with the mutant strain at times  $t \geq t_{\text{int}}$ , and  
173 allows us to estimate the probabilities of invasion (Section 3.2.2) and fixation (Section 5.1) of the  
174 mutant strain.

175 Each death in the birth-and-death process corresponds to the removal of a susceptible,  
176 which occurs by host death or recovery at combined rate

$$d_{\text{m}} = \delta + \alpha_{\text{m}} + \gamma_{\text{m}}. \quad (9)$$

177 We approximate the rate of new infections,

$$\frac{\beta_{\text{m}}(S_{\text{u}}^n(t) + \epsilon_{\text{m}}S_{\text{v}}^n(t))}{H^n(t)} = \frac{\beta_{\text{m}}(X_{\text{u}}^n(t) + \epsilon_{\text{m}}X_{\text{v}}^n(t))}{N^n(t)},$$

178 by replacing the stochastic quantities  $X_{\text{u}}^n(t)$ ,  $X_{\text{v}}^n(t)$  and  $N^n(t)$  by their deterministic approximations  
179  $X_{\text{u}}(t)$ ,  $X_{\text{v}}(t)$  and  $N(t)$ , giving the time-dependent birth rate

$$b_{\text{m}}(t) = \frac{\beta_{\text{m}}(X_{\text{u}}(t) + \epsilon_{\text{m}}X_{\text{v}}(t))}{N(t)}. \quad (10)$$

180 As we observed above, for the deterministic approximation,  $Y_{\text{m}}(t_{\text{int}}) = 0$ , and so we can compute  
181  $X_{\text{u}}(t)$ ,  $X_{\text{v}}(t)$  and  $N(t)$  using (4) *without* the mutant strain, using initial conditions (SI.1). See [49,  
182 Supplementary Information §8.2] for a rigorous justification for this approximation.

183 The so-called “merciless dichotomy” [33] tells us that, started with one individual, the  
184 birth-and-death process either goes extinct, or grows indefinitely. Thus, either the mutant strain  
185 vanishes, or the number infected with the mutant strain will eventually grow to be of the order of  
186  $n$  individuals, after which we can use (4) to compute the densities of both wild-type and mutant  
187 strains.

## 188 3.2 The Steps of Pathogen Adaptation

189 Using the two approximations above, we quantify the steps of pathogen evolution. First, we consider  
190 the appearance of a novel vaccine-resistant variant, which will either rapidly go extinct, or invade,  
191 causing an epidemic outbreak. Then, at the end of an epidemic, susceptible hosts are depleted,  
192 and there are few remaining infected with either wild-type and mutant strains, and both strains  
193 are at risk of extinction. If the variant outlives the wild-type, then the pathogen has adapted to  
194 the vaccine.

### 195 3.2.1 Step 1: Introduction of the variant by mutation

196 The first step of adaptation is driven by the production of new variants of the wild-type pathogen  
197 through mutation. The degree of adaptation to unvaccinated and vaccinated hosts may vary among  
198 those variants [16]. For instance, some vaccine-escape mutations may carry no fitness costs (or may  
199 even be adaptive) in unvaccinated hosts. These variants would be expected to invade and fix  
200 because they are strongly favoured by natural selection when the proportion of vaccinated hosts  
201 builds up. They will have a strong probability to avoid the risk of early extinction irrespective  
202 of the vaccination strategy. We thus focus on variants that carry fitness costs in immunologically  
203 naïve hosts (*i.e.*, variants *specialized* on vaccinated hosts [16]). In principle, the introduction of  
204 the vaccine-escape mutation may occur before the rollout of vaccination. The distribution of these  
205 mutations is expected to follow a stationary distribution resulting from the action of recurrent  
206 mutations and negative selection (see Supplementary Information, §5). If the fitness cost in naïve  
207 hosts is high and/or if the mutation rate is low then these pre-existing mutants are expected to be  
208 rare. In the following, we neglect the presence of pre-existing mutants and we focus on a scenario  
209 where the first vaccine-escape mutant appears after the start of vaccination (but see Supplementary  
210 Information, §5 where we discuss the effect of standing genetic variation).

211 At the onset of the vaccination campaign (*i.e.*,  $t = 0$ ) we assume that the system is at  
212 the endemic equilibrium (the equilibrium densities  $X_u(0)$ ,  $Y_{uw}(0)$  and  $Y_{vw}(0)$  are given in (SI.1)).  
213 We assume that an individual host infected with the wild-type produces vaccine-escape mutants

214 at a small, constant rate  $\theta_u/n$  if unvaccinated and  $\theta_v/n$  if vaccinated. While the rate of mutation  
215 is assumed to be constant through time, whether or not a mutant will escape extinction within  
216 a host may depend on the type of host. Indeed, a vaccine-escape mutation may have a higher  
217 probability to escape within-host extinction in vaccinated hosts. We account for this effect by  
218 making a distinction between  $\theta_u$  and  $\theta_v$ . If vaccine-escape mutations are more likely to escape  
219 extinction in vaccinated hosts we expect  $\theta_v > \theta_u$ . In other words,  $\theta_v/\theta_u - 1$  is a measure of the  
220 within-host fitness advantage of the vaccine-escape mutant in vaccinated hosts (they are assumed  
221 to have the same within-host fitness in naïve hosts). We assume that  $\theta_u$  and  $\theta_v$  are small enough  
222 that within-host clonal interference among vaccinated-adapted variants is negligible. The total rate  
223 of production of mutants is thus equal to

$$\frac{\theta_u}{n} I_{uw}^n(t) + \frac{\theta_v}{n} I_{vw}^n(t) \approx \theta_u Y_{uw}(t) + \theta_v Y_{vw}(t). \quad (11)$$

224 The arrival times of novel mutants are thus well approximated by a non-homogeneous Poisson  
225 process [14, p. 4] with rate

$$\lambda_{\text{int}}(t) = \theta_u Y_{uw}(t) + \theta_v Y_{vw}(t). \quad (12)$$

226 The probability that the arrival time  $T_{\text{int}}$  of the first vaccine-escape mutant is thus approximated  
227 by:

$$F_{\text{int}}(t) = \mathbb{P}\{T_{\text{int}} \leq t\} = 1 - e^{-\int_0^t \lambda_{\text{int}}(s) ds}. \quad (13)$$

228 In other words, the time  $T_{\text{int}}$  at which the vaccine-escape variant is first introduced by mutation  
229 depends on the dynamics of the incidence of the infections by the wild-type. Plots of  $F_{\text{int}}(t)$  for  
230 different values of rollout speed  $v$  in **Figure 3** show that a faster rollout of vaccination delays the  
231 introduction of the vaccine-escape mutant. This effect is particularly marked when  $\omega_r = 0$  because  
232 life-long immunity is known to result in a massive transient drop of the incidence (the honey-moon  
233 period)[45, 19] which is expected to decrease the influx of new variants during this period (**Figure**  
234 **SI.1**). **Figure 3** also shows how higher values of  $\omega_v$  can increase the influx of vaccine-escape  
235 variants. As discussed in the following section, the subsequent fate of vaccine-escape mutants  
236 depends strongly on the timing of their arrival.

### 237 3.2.2 Step 2: Variant invasion

238 Immediately after its introduction, the dynamics of the vaccine-escape mutant may be approximated  
 239 by a time-inhomogeneous birth-death process where the rate of birth (*i.e.*, rate of new infections  
 240 by the mutant) varies with the availability of susceptible hosts (see Section 3.1.2). The probability  
 241 a mutant introduced at  $T_{\text{int}} = t_{\text{int}}$ <sup>1</sup> successfully invades (see [34] and Supplementary Information,  
 242 §2) is:

$$P_{\text{inv}}(t_{\text{int}}) = \frac{1}{1 + \int_{t_{\text{int}}}^{\infty} d_m e^{-\int_t^s b_m(u) - d_m du} ds}, \quad (14)$$

243 with  $b_m(t)$  and  $d_m$  as defined above, (9), (10). In general, the integrals in (14) are impossible to  
 244 compute exactly; in Methods, Section 5.2, we describe a fast numerical method.

245 Plotting the probability of invasion against the time of introduction,  $t$ , in **Figure 4** shows  
 246 that the time at which the vaccine-escape mutant is introduced has a dramatic impact on the  
 247 probability of escaping early extinction. If the mutant is introduced early, the density of susceptible  
 248 vaccinated hosts remains very low and the selection for the vaccine-escape mutant is too small to  
 249 prevent stochastic extinctions. The probability of invasion increases with selection, and thus with  
 250 the density of vaccinated hosts, which tends to increase with time (see equation (6)).

251 Taking  $t \rightarrow \infty$  allows us to consider the situation when the vaccine-escape mutant appears  
 252 at the post-vaccination endemic equilibrium, *i.e.*, when the densities of unvaccinated and vaccinated  
 253 susceptible hosts are  $X_u^*$  and  $X_v^*$ , respectively (see Supplementary Information §1.3). At that point  
 254 in time the effective per-generation reproduction ratio of genotype  $i$  (*i.e.*, the expected number of  
 255 secondary infections produced by pathogen genotype  $i$ ) is (*cf.* (7)):

$$\mathcal{R}_i^* = \lim_{t \rightarrow \infty} \mathcal{R}_i^c(t) = \mathcal{R}_i \left( \frac{X_u^*}{N^*} + \epsilon_i \frac{X_v^*}{N^*} \right) \quad (15)$$

256 By definition, at the endemic equilibrium set by the wild-type pathogen we have  $\mathcal{R}_w^* = 1$ . Hence,  
 257 a necessary condition for the mutant to invade this equilibrium is  $\mathcal{R}_m^* > 1$ , *i.e.*, the effective

---

<sup>1</sup>To clarify,  $T_{\text{int}}$  is the random time at which a mutation arises; when we specify  $T_{\text{int}} = t_{\text{int}}$ , we are conditioning on the event in which the random quantity  $T_{\text{int}}$  takes the fixed value  $t_{\text{int}}$ .

258 reproduction number of the mutant has to be higher than that of the wild-type (see Supplementary  
259 Information, §1.3). However, this is not a sufficient condition: many mutants that satisfy this  
260 condition will rapidly go extinct due to demographic stochasticity. But in contrast to an early  
261 introduction of the mutant discussed above, the stochastic dynamics of the mutant is approximately  
262 a *time-homogeneous* branching process because the birth rate of the mutant approaches  $b_m^* =$   
263  $\beta_m \left( \frac{X_u^*}{N^*} + \epsilon_m \frac{X_v^*}{N^*} \right)$ . This birth rate is constant because the density of susceptible hosts remains  
264 constant at the endemic equilibrium. The probability of mutant invasion after introducing a single  
265 host infected by the mutant is thus (see Supplementary Information §3; **Figure 4**):

$$P_{\text{inv}}^* = \lim_{t \rightarrow \infty} P_{\text{inv}}(t) = 1 - \frac{\mathcal{R}_w^*}{\mathcal{R}_m^*} = 1 - \frac{1}{\mathcal{R}_m^*}. \quad (16)$$

266 (note that we recover the strong-selection result of [49]). This expression shows that *at this endemic*  
267 *equilibrium* the fate of the mutant is fully governed by the per-generation reproduction ratio of the  
268 two strains, but does not depend on the specific values of the life-history traits of the mutant  
269 (provided the different vaccine-escape variants have the same value of  $\mathcal{R}_m^*$ ).

270 Interestingly, unlike  $P_{\text{inv}}^*$ , the probability  $P_{\text{inv}}(t_{\text{int}})$  that a mutant introduced at time  $T_{\text{int}} =$   
271  $t_{\text{int}}$  successfully invades (14) is not governed solely by  $\mathcal{R}_i$ , but rather depends on the life-history  
272 traits of the mutants. For instance, assume that two vaccine-escape mutants have the same values  
273 of  $\mathcal{R}_m$  and  $\epsilon_m$  but they have very different life-history strategies. The “slow” strain has low rates  
274 of transmission and virulence (in green in **Figure 4**) while the “fast” strain has high rates of  
275 transmission and virulence (in red in **Figure 4**). **Figure 4** shows that the high mortality rate of  
276 hosts infected by the fast strain increases the risk of early extinction and lowers the probability of  
277 invasion relative to the slow strain. Hence, in the early stage of adaptation, pathogen life-history  
278 matters and favours slow strains with lower rates of transmission and virulence.

### 279 **3.2.3 Step 3: After variant invasion**

280 Successful invasion of the vaccine-escape mutant means that it escaped the “danger zone” when its  
281 density is so low that it is very likely to go extinct (**Figure 1d-f**). After this invasion we can describe

282 the dynamics of the polymorphic pathogen population using the deterministic approximation (4).

283 Because the invasion of the mutant at the endemic equilibrium set by the wild-type requires  
284 that  $\mathcal{R}_m^* > \mathcal{R}_w^*$ , we might expect from the analysis of the deterministic model that the mutant would  
285 always replace the wild-type pathogen. That is, the wild-type pathogen would go extinct before  
286 the mutant (**Figure 1f**). This is indeed the case when the phenotypes of the mutant and the  
287 wild-type are not very different because of the “invasion implies fixation” principle [23, 9, 51]. Yet,  
288 this principle may be violated if the phenotype of the vaccine-escape mutant is very different than  
289 the phenotype of the wild-type.

290 First, the long-term coexistence of the two genotypes is possible (**Figure 1e**). The co-  
291 existence requires that each genotype is specialized on distinct types of host. The wildtype is  
292 specialised on unvaccinated hosts (*i.e.*,  $\mathcal{R}_w > \mathcal{R}_m$ ) and the mutant is specialised on the vacci-  
293 nated hosts (*i.e.*,  $\epsilon_m > \epsilon_w$ ). Intermediate rates of vaccination maintain a mix of vaccinated and  
294 unvaccinated host which promotes coexistence between the two genotypes (**Figure SI.2**). Sec-  
295 ond, the vaccine-escape mutant may be driven to extinction before the wild-type if its life-history  
296 traits induce massive epidemiological perturbations after its successful invasion (**Figure 1d**). As  
297 pointed out by previous studies, more transmissible and aggressive pathogen strategies may yield  
298 larger epidemics because the speed of the epidemic is governed by the per-capita growth rate  $r_i$ ,  
299 not by the per-generation reproduction ratio  $\mathcal{R}_i$  [19]. This explosive dynamics is driven by an  
300 over-exploitation of the host population and is immediately followed by a massive decline in the  
301 incidence of the vaccine-escape mutant. In a finite host population, this may result in the extinction  
302 of the vaccine-escape mutant before the wild-type [55]. We capture this outcome with a hybrid  
303 analytical-numerical approach that computes the probability  $P_{\text{fix}}(t_{\text{int}})$  that the wild-type will go  
304 extinct before a mutant introduced at time  $T_{\text{int}} = t_{\text{int}}$  (see Methods, section 5.1). **Figure 5** shows  
305 that two vaccine-escape mutants may have very different probabilities of fixation, even if they have  
306 the same per-generation reproduction ratio. The numerical computation of the probability of fix-  
307 ation agrees very well with individual-based stochastic simulations. The faster strain is unlikely  
308 to go to fixation because invasion is followed by a period where the birth rate drops to very low

309 levels (far below the mortality rates, **Figure SI.3**). In other words, a more aggressive strategy will  
310 more rapidly degrade its environment, by depleting susceptible hosts, which is known to increase  
311 the probability of extinction [10]. Interestingly, this effect is only apparent when the time of intro-  
312 duction,  $T_{\text{int}}$ , is large. Indeed, when the mutant is introduced soon after the start of vaccination,  
313 its probability of invasion is already very low because its initial growth rate is negative (**Figure**  
314 **SI.3a, b, c**). When the mutant is introduced at intermediate times, the initial growth rate of the  
315 mutant is positive because some hosts are vaccinated (**Figure SI.3d, e, f**). If the vaccine-escape  
316 mutant is introduced later, the growth rate of the mutant is initially very high as many hosts are  
317 vaccinated (and thus susceptible to the vaccine-escape mutant) but this is rapidly followed by a  
318 drop in host density (especially pronounced with the faster strain) which prevents the long-term  
319 establishment of the faster strain (see **Figure SI.3g, h, i**).

### 320 **3.2.4 The overall risk of pathogen adaptation**

321 The overall probability that the pathogen will adapt to vaccination (*i.e.*, that a vaccine-escape  
322 variant invades and eventually replaces or coexists with the wild-type) depends upon the probability  
323 that the mutation will arise (step 1) and the probability that this mutation will escape early  
324 extinction (step 2) and eventually go to fixation (step 3). It is particularly relevant to explore the  
325 effect of the speed of vaccination rollout on the overall probability that some vaccine-escape variant  
326 successfully invades at some time  $T_{\text{inv}} \leq t$  after the start of the vaccination campaign (steps 1 and  
327 2, **Figure 6**). Note that several variants can arise and fail to invade before finally a lucky variant  
328 manages to invade. We can use the probability of invasion  $P_{\text{inv}}(t)$  of a variant introduced at time  
329  $t$  to characterize the distribution,  $F_{\text{inv}}(t)$ , of the first time,  $T_{\text{inv}}$ , at which a mutant is introduced  
330 that successfully invades. Using (12) and (14), this is

$$F_{\text{inv}}(t) = \mathbb{P}\{T_{\text{inv}} \leq t\} = 1 - e^{-\int_0^t \lambda_{\text{int}}(s) P_{\text{inv}}(s) ds}. \quad (17)$$

Compare (13) with (17) and note that the probability that no vaccine-escape mutant will



ever *arise* is

$$\mathbb{P}\{T_{\text{int}} = \infty\} = e^{-\int_0^{\infty} \lambda_{\text{int}}(s) ds}.$$

In contrast, the probability that no vaccine-escape mutant will ever *invade* is the larger probability

$$\mathbb{P}\{T_{\text{inv}} = \infty\} = e^{-\int_0^{\infty} \lambda_{\text{int}}(s) P_{\text{inv}}(s) ds}.$$

Note that  $P_{\text{inv}}(t)$  converges as  $t \rightarrow \infty$  to  $P_{\text{inv}}^* = 1 - 1/\mathcal{R}_m^*$  which is nonzero, so that  $\mathbb{P}\{T_{\text{int}} = \infty\} = 0$  if and only if

$$\int_0^{\infty} \lambda_{\text{int}}(s) ds = \infty,$$

331 which in turn is true if and only if  $\mathbb{P}\{T_{\text{inv}} = \infty\} = 0$ . That is, the probability of adaptation is 1 if  
332 and only if  $\lambda_{\text{int}}(t)$  is not integrable. In other words, the probability of adaptation is 1 in the limit  
333  $t \rightarrow \infty$  when the wild-type is not driven to extinction by vaccination (*i.e.*,  $v < v_c$ ) which implies  
334 that there is an uninterrupted flux of mutation producing vaccine-escape variants. One of these  
335 mutants will eventually escape extinction and invade. Yet, the time needed for a successful variant  
336 to appear may be very long (equation (17) and **Figure 6**).

337 When  $v > v_c$ , vaccination is expected to eradicate the disease rapidly in our model (but  
338 see Supplementary Information §1.3). But an escape mutation may appear by mutation before  
339 eradication and rescue the pathogen population. This scenario fits squarely within the framework  
340 of classical “evolutionary rescue” modelling [43, 2, 7]. Yet, vaccination rollout is unlikely to be  
341 fast enough to eradicate the wildtype pathogen and, in this case, the probability of adaptation  
342 goes to 1 when  $t \rightarrow \infty$ . Indeed, when  $v < v_c$ , a vaccine-escape variant will eventually appear by  
343 mutation and invade. But what is less clear is how fast this adaptation will take place. We can  
344 use equation (17) to explore the effect of the speed of adaptation on the probability of pathogen  
345 adaptation at time  $t$  after the start of vaccination (*i.e.*, the speed of adaptation). Crucially, the  
346 speed of pathogen adaptation is maximized for intermediate values of the speed of vaccination  
347 rollout. This is due to the antagonistic consequences the speed of the rollout has upon these  
348 two steps of adaptation (compare **Figures 3 and 4**). Faster rollout reduces  $\lambda_{\text{int}}$ , the influx of

349 new mutations, but increases  $P_{\text{inv}}$  because higher vaccination coverage yield stronger selection for  
350 vaccine-escape mutations. **Figure 6** illustrates how the speed of adaptation given in (17) results  
351 from the balance between the time-varying probability  $F_{\text{int}}(t)$  that a variant is introduced by  
352 mutation before time  $t$  and the probability  $P_{\text{inv}}(t)$  that this variant successfully invades (recall that  
353  $P_{\text{inv}}^*$  is a good approximation of this probability of invasion, see (16)).

## 354 4 Discussion

355 Vaccination is a powerful tool to control the spread of infectious diseases, but some pathogens  
356 evolve to escape the immunity triggered by vaccines (*e.g.*, influenza, SARS-CoV-2). Will pathogens  
357 continue to adapt to the different vaccines that are being used to halt their spread? Does the  
358 likelihood of this adaptation depend on the speed of the vaccination rollout? To answer these  
359 questions we must first understand the different steps that may eventually lead to adaptation to  
360 vaccination.

361 Mutation is the fuel of evolution, and the first step of adaptation to vaccination is the  
362 mutational process that produces vaccine-escape variants. For instance, even if initial estimates  
363 of SARS-CoV-2 mutation rates were reassuringly low [52], the virus has managed to evolve higher  
364 rates of transmission [15, 62] and these adaptations are challenging control measures currently being  
365 used to slow down the ongoing pandemic. The ability of the new variants of SARS-CoV-2 to escape  
366 immunity is also worrying and indicates that viral adaptation can weaken vaccine efficacy [63, 50].  
367 The rate at which these potential vaccine-escape mutations are introduced depends on the density  
368 of hosts infected by the wild-type virus. In this respect, a faster rollout of vaccination is expected  
369 to delay the arrival of these mutations (**Figure 3**). Some authors, however, have argued that  
370 vaccine-escape mutations may arise more frequently in infected hosts which are partially immunized  
371 [56, 13, 16]. Our model can be used to explore the consequences of this within-host evolution in  
372 vaccinated hosts (*e.g.*, taking  $\theta_v > \theta_u$ ). A larger value of  $\theta_v$  increases the overall rate of mutation  
373 (**Figure 3**) but this effect is modulated by the fraction of the host population that is vaccinated.  
374 Consequently, when  $\theta_v > \theta_u$ , the speed of vaccination rollout can have a non-monotonic effect on

375 the probability that a vaccine-escape mutation is introduced (see **Figure SI.4**). Indeed, when the  
376 rate of vaccination remains low, the enhancing effect of vaccination on the rate of introduction of  
377 new mutations can counteract the delaying effect of faster vaccination rollout discussed above. But  
378 the probability that a vaccine-escape mutation is introduced drops to very low levels when the rate  
379 of vaccination gets closer to the critical vaccination rate  $v_c$ .

380 The second step of adaptation starts as soon as the vaccine-escape mutant has been in-  
381 troduced in the pathogen population. Will this new variant go extinct rapidly or will it start to  
382 invade? The answer to this question depends on the time at which the mutant is introduced. If  
383 the mutant is introduced when the population is not at an endemic equilibrium, the fate of the  
384 mutant depends on a time-varying birth rate which is driven by the fluctuations of the density of  
385 susceptible hosts. In our model, early introductions are likely to result in rapid extinction because  
386 there are simply not enough vaccinated hosts to favour the mutant over the wild-type. Moreover,  
387 we found that earlier introductions are likely to favour slower life-history strategies which are less  
388 prone to early extinction. If the introduction takes place later, when the system has reached a new  
389 endemic equilibrium, the fate of the mutant is solely governed by the effective per-generation ratio  
390  $\mathcal{R}_m^*$  and does not depend on the life-history traits of the mutant. Slow and fast variants have equal  
391 probability to invade if they have the same  $\mathcal{R}_m^*$ . Altogether, our results suggest that earlier arrival  
392 may not always facilitate invasion since the probability of invasion is limited by the time-varying  
393 epidemiological state of the host population.

394 The third step of adaptation starts as soon as the hosts infected by the vaccine-escape  
395 mutant are abundant and the effect of demographic stochasticity on the dynamics of this mutation  
396 becomes negligible. Our analysis attempts to better characterize the dynamics of the mutant  
397 after invasion using a combination of deterministic and stochastic approximations. In principle,  
398 conditional on invasion, we can use the deterministic model (4) to describe the joint dynamics  
399 of the mutant and the wild-type. In particular, the speed at which the vaccine-escape mutant  
400 spreads in the pathogen population can be well approximated by the deterministic model. This  
401 may be particularly useful to address the impact of various vaccination strategies on the speed of

402 the spread of a vaccine-escape variant [21]. In the present work we show that life-history traits  
403 of the vaccine-escape mutant drive the speed of its spread. Indeed, as pointed out before, the  
404 deterministic transient dynamics depends on the per-capita growth rate of the mutant  $r_m$ , not its  
405 per-generation reproduction ratio  $\mathcal{R}_m$  [19]. Transient dynamics may favour a fast and aggressive  
406 variant (*i.e.*, faster increase in frequency of this variant) because this life-history strategy may be  
407 more competitive away from the endemic equilibrium. Yet, this explosive strategy may be risky  
408 for the pathogen if it leads to epidemiological fluctuations that result in a massive drop in the  
409 number of infections. The consequences of such fluctuations on the extinction risk of the variant  
410 can be accounted for by a generalized birth-death process where the per-capita growth rate of  
411 the mutant varies with time. Epidemiological fluctuations lead to a degradation of the future  
412 environment (*i.e.*, depletion of the density of susceptible hosts) which results in an increased risk  
413 of extinction [34, 10]. This effect has recently been analysed in a purely epidemiological model  
414 without vaccination [48]. In this simpler scenario, it is also relevant to make a distinction between  
415 early extinction (*i.e.*, a *fizzle* in [48], **Figure 1c**) and extinction after a successful invasion (*i.e.*, an  
416 *epidemic burnout* in [48], **Figure 1d**) and it is possible to use a similar hybrid semi-deterministic  
417 approach to obtain accurate analytical approximations for both events.

418         A comprehensive understanding of pathogen dynamics after vaccination relies on the use  
419 of a combination of theoretical tools to capture the interplay between stochastic and deterministic  
420 forces. Here, we use a hybrid numerical-analytical approach to account for the three successive steps  
421 that may eventually lead to the fixation of a vaccine-escape mutant. This theoretical framework  
422 is particularly suitable to explore the influence of different vaccination strategies on the risk of  
423 pathogen adaptation. In particular, we show that this risk drops to very low levels even when the  
424 speed of vaccination rollout is below the threshold value that may eventually lead to eradication  
425 (*i.e.*,  $v < v_c$ ). In other words, faster vaccination rollout makes sense even when eradication is  
426 infeasible, because faster rollout decreases both the number of cases and the likelihood of pathogen  
427 evolution. This conclusion is akin to the general prediction that the rate of pathogen adaptation  
428 should be maximized for intermediate immune pressure or for medium doses of chemotherapy at the  
429 within-host level [27, 53, 40, 1, 30, 17, 2]. Most of these earlier studies focused on evolutionary rescue

430 scenarios where the wild-type is expected to be rapidly driven to extinction by human intervention.  
431 Our versatile theoretical framework, however, allows us to deal with a broader range of situations  
432 where the intervention is not expected to eradicate the wild-type pathogen. Accounting for the  
433 dynamics of the wild-type affects both the flux of mutation and the fate of these mutations. Note  
434 how our decomposition of the factors acting on the probability of adaptation (**Figure 6**) provides a  
435 validation of the verbal argument often used in earlier studies to explain the higher rate of pathogen  
436 adaptation for intermediate levels of vaccination coverage of drug concentration [27, 53, 40, 56].

437 The framework we have developed can be readily extended to explore many other situa-  
438 tions. For instance, our model can be modified to explore the influence of temporal variations in the  
439 environment that could be driven by seasonality or by non-pharmaceutical interventions (NPIs).  
440 We explored a situation where the transmission rate of all variants is periodically reduced by a  
441 quantity  $1 - c(t)$ , where  $c(t)$  is a measure of the intensity of NPIs. These periodic interventions  
442 affect both the flux of mutations and the probability that these mutations invade. In particular,  
443 NPIs lower the probability of mutant introduction through the reduction in the density of hosts  
444 infected by the wild-type (**Figure SI.4**). As a consequence, the probability of adaptation is re-  
445 duced when vaccination is combined with periodic control measures. Hence, our approach helps to  
446 understand the interaction between vaccination and NPI discussed in earlier studies [54, 42].

447 We have made several simplifying assumptions that need to be relaxed to confidently  
448 apply our findings to a broader range of pathogens such as the current SARS-CoV-2 pandemic (see  
449 section 5.6 in the Methods). First, one should study situations where the pathogen population  
450 has not reached an endemic equilibrium when vaccination starts to be applied. We carried out  
451 additional simulations showing that starting the vaccination rollout sooner (*i.e.*, just after the start  
452 of the epidemic) tends to promote the probability of invasion of the escape mutant (**Figure SI.5**).  
453 Indeed, at the onset of the epidemic the density of susceptible hosts is higher (*i.e.*, the birth rate  
454 of the infection is high relative to the endemic equilibrium) and the risk of early extinction of the  
455 mutant is reduced. Second, it is important to relax the assumption that natural immunity is perfect.  
456 We carried out additional simulations showing that when naturally immune hosts, like vaccinated

457 hosts, can be reinfected the probability of invasion of the escape mutant increases (**Figure SI.6**).  
458 This effect is particularly strong just after the start of vaccination. Indeed, if naturally immune  
459 hosts are equivalent to vaccinated hosts, selection to escape immunity is present even before the  
460 start of vaccination and one may thus expect the speed of adaptation to be much faster. Yet, the  
461 vaccination strategy can affect the rate of adaptation. In particular, we find that faster rates of  
462 vaccination always reduce the rate of adaptation via the reduction of the influx of escape mutants  
463 (**Figure SI.7**). Another important extension of our model would be to study the effect of a diversity  
464 of vaccines in the host population. We did not explore this effect in the present study but this  
465 diversity of immune profiles among vaccinated hosts could slow down pathogen adaptation if the  
466 escape of different vaccines requires distinct mutations [60, 11, 46].

467 Finally, it is important to recall that we focus here on a simplified scenario where we  
468 analyse the evolutionary epidemiology of an isolated population. In real-life situations the arrival  
469 time may depend more on the immigration of new variants from abroad than on local vaccination  
470 policies. The influence of migration remains to be investigated in spatially structured models where  
471 vaccination may vary among populations [24].

## 472 5 Methods

473 In this section, we present how extinction, invasion and fixation probabilities may be obtained  
474 under strong-selection assumptions when a mutant strain appears in a host-pathogen system that  
475 is away from its endemic equilibrium. Our essential tools are the deterministic ordinary differential  
476 equations (Section 3.1.1) and birth-and-death process approximations, (Section 3.1.2). The former  
477 allows us to consider the situation when all strains are abundant, the latter when at least one  
478 strain is rare. We will limit ourselves to an informal treatment, presenting heuristic arguments and  
479 deferring rigorous proofs and sharp error bounds to a future treatment.

## 480 5.1 Approximating the Fixation Probability

481 Suppose that the mutant strain introduced at time  $T_{\text{int}} = t_{\text{int}}$  successfully invades; we next consider  
 482 the probability  $P_{\text{fix}}(t_{\text{int}})$  that the mutant will outcompete the wild-type and go to fixation. Fixation  
 483 of the mutant occurs if it is still present when the wild-type strain disappears. If we let  $T_{\text{ext}}^m$  and  
 484  $T_{\text{ext}}^w$  be the extinction times of mutant and wild-type strains, the probability of mutant fixation is  
 485 thus  $\mathbb{P}\{T_{\text{ext}}^w < T_{\text{ext}}^m\}$  which we may decompose as

$$\begin{aligned} \int_{t_{\text{int}}}^{\infty} \mathbb{P}\{T_{\text{ext}}^m > t\} \mathbb{P}\{T_{\text{ext}}^w \in [t, t + dt)\} &= - \int_{t_{\text{int}}}^{\infty} \mathbb{P}\{T_{\text{ext}}^m > t\} \frac{d}{du} \mathbb{P}\{T_{\text{ext}}^w > t\} dt \\ &= - \int_{t_{\text{int}}}^{\infty} \mathbb{P}\{I_m^n(t) > 0\} \frac{d}{dt} (1 - \mathbb{P}\{I_w^n(t) = 0\}) dt \quad (18) \\ &= \int_{t_{\text{int}}}^{\infty} \mathbb{P}\{I_m^n(t) > 0\} \frac{d}{dt} \mathbb{P}\{I_w^n(t) = 0\} dt. \end{aligned}$$

486 We obtain estimates of  $\mathbb{P}\{I_w^n(t) > 0\}$  and  $\mathbb{P}\{I_m^n(t) > 0\}$  ( $t > t_{\text{int}}$ ) by now approximating  
 487 *both* mutant *and* wild-type strains by birth-death-processes  $\tilde{I}_m(t)$  and  $\tilde{I}_w(t)$  (see Section 3.1.2).  
 488 The birth rates for the two types,  $i = w, m$ , are given by

$$b_i(t) = \frac{\beta_i(X_u(t) + \epsilon_i X_v(t))}{N(t)} \quad (19)$$

489 and the death rates are

$$d_i = \delta + \alpha_i + \gamma_i. \quad (20)$$

490 for  $i \in \{w, m\}$ .

491 As previously, we are approximating the frequency of unvaccinated and vaccinated hosts  
 492 by their deterministic approximations

$$\frac{X_u^n(t)}{N^n(t)} \approx \frac{X_u(t)}{N(t)} \quad \text{and} \quad \frac{X_v^n(t)}{N^n(t)} \approx \frac{X_v(t)}{N(t)}.$$

493 and compute the latter using the ordinary differential equations (4). Unlike previously, when we  
 494 assumed that the mutant was rare, and took  $Y_m(t) \equiv 0$ , we are now allowing the possibility that

495 the mutant is abundant, and cannot neglect the effect of the mutant strain on  $X_v$  and  $X_u$ . In  
496 particular, we need to take care in choosing the initial conditions of (4) to account for the fact  
497 that we consider the time of appearance of the first mutant that successfully invades and so are  
498 conditioning on the non-extinction of the mutant strain, and to account for the inherent variability  
499 in the time required to invade; this results in a random initial condition for the deterministic  
500 dynamics (see Supplementary Information §4 for details). In practice, we find that the randomness  
501 has negligible effect, but we must still take the conditioning into account. To do so, we first use (4)  
502 with  $Y_m(0) = 0$  (so  $Y_m(t) \equiv 0$  for  $t > 0$ ) and initial conditions (SI.1) to compute the epidemiological  
503 dynamics of the wild-type from time 0 up until the the introduction of the mutant at time  $t_{\text{int}}$ .  
504 Then, at time  $t_{\text{int}}$ , we restart (4) with new initial conditions: we use the values  $X_u(t_{\text{int}})$ ,  $X_v(t_{\text{int}})$ ,  
505  $N(t_{\text{int}})$  and  $Y_w(t_{\text{int}})$  computed assuming  $Y_m(0) = 0$ , and take

$$Y_m(t_{\text{int}}) = \frac{1}{P_{\text{inv}}(t_{\text{int}})n} \quad (21)$$

506 (see Supplementary Information §4 for details). Crucially, the initial density of the mutant depends  
507 on the probability of successful invasion of the mutant  $P_{\text{inv}}(t_{\text{int}})$  obtained above (14).

508 Provided we use (4) with the appropriate initial conditions as previously, the birth rates  
509 of both the wild-type and mutant strains are approximately deterministic, and from [34], we have:

$$\mathbb{P}\{I_i^n(t) > 0\} \approx \mathbb{P}\{\tilde{I}_i(t) > 0\} \quad (22)$$

510 Under the branching assumption, the lines of descent of distinct infected individuals are indepen-  
511 dent, hence the probability that strain  $i$  vanishes by time  $t$  is the product of the probabilities that  
512 each line of descent vanishes,

$$\mathbb{P}\{\tilde{I}_i(t) > 0\} = 1 - (1 - U_i(t|t_{\text{int}}))^{I_i^n(t_{\text{int}})} \approx 1 - (1 - U_i(t|t_{\text{int}}))^{nY_i(t_{\text{int}})}, \quad (23)$$



513 where

$$U_i(t|t_{\text{int}}) = \frac{1}{1 + \int_{t_{\text{int}}}^t d_i e^{-\int_{t_{\text{int}}}^s b_i(u) - d_i du} ds} \quad (24)$$

514 is the probability that an individual infected with strain  $i \in \{w, m\}$  present at time  $t_{\text{int}}$  has de-  
 515 scendants alive at time  $t > t_{\text{int}}$  and we approximate the initial *number* of individuals infected with  
 516 strain  $i$  using the *frequencies* obtained using (4) and (21):

$$I_i^n(t_{\text{int}}) = nY_i^n(t_{\text{int}}) \approx nY_i(t_{\text{int}}). \quad (25)$$

517 Below in Section 5.2.3, we give a fast numerical method for computing  $U_i(t|t_{\text{int}})$ .

## 518 5.2 Auxiliary Functions

519 In the following we present a simple, yet versatile, hybrid (*i.e.*, semi-deterministic and semi-  
 520 numerical) framework which allows us to approximate the probabilities associated with different  
 521 steps of adaptation (mutation, invasion, fixation) by adding auxiliary equations describing stochas-  
 522 tic phenomena to the deterministic ordinary differential equations describing the global population  
 523 dynamics.

### 524 5.2.1 Introduction of the variant by mutation (step 1)

525 Recall  $F_{\text{int}}(t) = 1 - e^{-\int_0^t \lambda_{\text{int}}(s) ds}$ , (13), where  $\lambda_{\text{int}}(t) = \theta_u Y_{uw}(t) + \theta_v Y_{vw}(t)$ , (12). Rather than  
 526 computing the integral – which would require that we compute  $\lambda_{\text{int}}(s)$  (and thus  $Y_{uw}(s)$  and  $Y_{vw}(s)$ )  
 527 for every  $s < t$ , we observe that the cumulative hazard  $\Lambda_{\text{int}}(t) = \int_0^t \lambda_{\text{int}}(s) ds$  can be computed by  
 528 combining (4) with initial conditions (SI.1) and the *auxilliary* differential equation

$$\dot{\Lambda}_{\text{int}} = \lambda_{\text{int}} \quad (26)$$

529 with initial condition  $\Lambda_{\text{int}}(0) = 0$ . The use of this auxiliary equation reduces computational effort  
 530 by obtaining  $\Lambda_{\text{int}}(t)$  simultaneously with  $Y_{uw}(t)$  and  $Y_{vw}(t)$  (as opposed to computing the latter  
 531 two and then integrating).

## 532 5.2.2 Invasion of the variant (step 2)

533 In practice, the probability of mutant invasion (14) involves integrals that cannot be explicitly  
534 computed, and we must compute it numerically. To do so, we make use of one of the steps  
535 involved in computing  $P_{\text{inv}}(t_{\text{int}})$  in [34]. There, it is shown that

$$P_{\text{inv}}(t_{\text{int}}) = U_{\text{m}}(\infty|t_{\text{int}}) = \lim_{t \rightarrow \infty} U_{\text{m}}(t|t_{\text{int}}),$$

536 where

$$U_{\text{m}}(t|t_{\text{int}}) = \mathbb{P}\{\tilde{I}_{\text{m}}(t) > 0 | \tilde{I}_{\text{m}}(t_{\text{int}}) = 1\} \quad (27)$$

537 is obtained via a pair of auxiliary functions

$$\dot{U}_{\text{m}} = -d_{\text{m}}U_{\text{m}}V_{\text{m}} \quad (28a)$$

$$\dot{V}_{\text{m}} = (d_{\text{m}} - b_{\text{m}}(t))V_{\text{m}} - d_{\text{m}}V_{\text{m}}^2, \quad (28b)$$

538 with initial conditions

$$U_{\text{m}}(t_{\text{int}}|t_{\text{int}}) = V_{\text{m}}(t_{\text{int}}|t_{\text{int}}) = 1$$

539 (*N.B.*,  $\dot{U}_{\text{m}}$  and  $\dot{V}_{\text{m}}$  denote the derivatives with respect to  $t$ ). We compute  $b_{\text{m}}(t)$ , which depends on  
540  $X_{\text{u}}(t)$ ,  $X_{\text{v}}(t)$  and  $N(t)$  (see (10)), via (4). In practice, we cannot compute  $U_{\text{m}}(\infty|t)$ ; to obtain an  
541 approximation we approximate it by  $U_{\text{m}}(t|t_{\text{int}})$  for the first  $t$  sufficiently large that

$$|U_{\text{m}}(t + \Delta t|t_{\text{int}}) - U_{\text{m}}(t|t_{\text{int}})|$$

542 is less than our desired threshold of error, where  $\Delta t$  is the step size in our numerical scheme.

543 **5.2.3 Fixation of the variant (step 3)**

544 In practice, we need two pairs of auxiliary equations,  $i \in \{w, m\}$ , to track the probabilities that  
 545 some descendant of a wild-type or mutant individual that was present at  $t_{\text{int}}$  is still alive at time  $t$ :

$$U_i(t|t_{\text{int}}) = \mathbb{P}\{\tilde{I}_i(t) > 0 | \tilde{I}_i = 1\} \quad (29)$$

546 Exactly as in (28) above, these satisfy

$$\dot{U}_i = -d_i U_i V_i \quad (30a)$$

$$\dot{V}_i = (d_i - b_i(t))V_i - d_i V_i^2, \quad (30b)$$

547 with

$$U_i(t_{\text{int}}|t_{\text{int}}) = V_i(t_{\text{int}}|t_{\text{int}}) = 1,$$

548 for  $i \in \{u, v\}$ .

549 To compute the probability of fixation, we first consider the probability that fixation occurs  
 550 prior to time  $t$ , which is derived in exactly the same manner as (18).

$$\mathbb{P}\{\text{fixation prior to } t\} = \int_{t_{\text{int}}}^t \mathbb{P}\{I_m^n(s) > 0\} \frac{d}{ds} \mathbb{P}\{I_w^n(s) = 0\} ds.$$

551 Proceeding as in Section 5.1, approximating the probabilities  $\mathbb{P}\{I_m^n(s) > 0\}$  and  $\mathbb{P}\{I_w^n(s) = 0\}$  by  
 552  $\mathbb{P}\{\tilde{I}_m(s) > 0\}$  and  $\mathbb{P}\{\tilde{I}_w(s) = 0\}$  and initial number of hosts infected with the wild-type using the  
 553 deterministic density,  $I_w^n(t_{\text{int}}) \approx nY_w(t_{\text{int}})$ , using the branching property (23) this is approximately

$$U_{\text{fix}}(t|t_{\text{int}}) = \int_{t_{\text{int}}}^t \left( 1 - (1 - U_m(s|t_{\text{int}}))^{nY_w(t_{\text{int}})} \right) \times \left( nY_w(t_{\text{int}}) (-\dot{U}_w(s|t_{\text{int}})) (1 - U_w(s|t_{\text{int}}))^{nY_w(t_{\text{int}})-1} \right) ds. \quad (31)$$

554 Differentiating yields the following auxiliary equation for  $U_{\text{fix}}(t)$ :

$$\dot{U}_{\text{fix}} = nY_w(t_{\text{int}})(\delta + \alpha_w + \gamma_w)U_w V_w (1 - U_w)^{nY_w(t_{\text{int}})-1} U_m, \quad (32)$$

555 with initial condition  $U_{\text{fix}}(t_{\text{int}}|t_{\text{int}}) = 0$ . We estimate the fixation probability as

$$P_{\text{fix}}(t_{\text{inv}}) = \lim_{t \rightarrow \infty} U_{\text{fix}}(t|t_{\text{int}}), \quad (33)$$

556 approximating the limit at infinity as we did for  $P_{\text{inv}}(t_{\text{int}})$  in Section 5.2.2 above.

### 557 5.2.4 The overall risk of pathogen adaptation

558 We numerically compute the cumulative density function  $F_{\text{inv}}(t) = \mathbb{P}\{T_{\text{inv}} \leq t\}$  of the first arrival  
559 time  $T_{\text{inv}}$  of a vaccine-escape mutant that successfully invades (17) analogously to  $F_{\text{int}}$  (Section  
560 5.2.1), using the auxiliary equation

$$\dot{\Lambda}_{\text{inv}} = \lambda_{\text{int}} P_{\text{inv}} \quad (34)$$

561 with initial condition  $\Lambda_{\text{inv}}(0) = 0$ , computing  $Y_{\text{uw}}(t)$  and  $Y_{\text{vw}}(t)$  – and thus  $\lambda_{\text{int}}(t)$  – using (4) with  
562 initial conditions (SI.1).

### 563 5.3 Stochastic simulations

564 We carried out stochastic simulations to check the validity of our results. We developed an  
565 individual-based simulation program for the Markov process described in Table 1 and using the  
566 parameter values given in Table SI.1. In order to match the assumption used in our analysis we  
567 start the simulation when the system is at its endemic equilibrium before vaccination. Then we in-  
568 troduce a single host infected with the mutant pathogen at a time  $t_{\text{int}}$  after the start of vaccination  
569 and we let the simulation run until one of the pathogen variants (the wild-type or the mutant) goes  
570 extinct. If the wild-type goes extinct first we record this run as a “mutant fixation event”. We ran  
571 1000 replicates for each set of parameters and we plot the proportion of runs that led to mutant  
572 fixation in Figure 5. We also used our simulations to confirm our prediction on the speed of viral  
573 adaptation in Figure 6. In this scenario we allowed the vaccine-escape variant to be introduced

574 by mutation from the wild-type genotype. We carried out 1000 simulations and monitored (i) the  
575 frequency of the escape mutant at different points in time after the start of vaccination (**Figure 6a**)  
576 (ii) the number of introduction events by mutation and (**Figure 6b**). We also used this simulation  
577 approach to go beyond the scenarios used in our analysis to check the robustness of some of our  
578 results.

579 **Data accessibility:** The simulation code used to carry out stochastic simulations has  
580 been deposited on zenodo [10.5281/zenodo.12655541](https://zenodo.org/record/12655541).

581

582 **Acknowledgements:** SG acknowledges support from the CNRS PEPS 2022 grant “VaxDurable”.

## 583 References

- 584 [1] H. K. Alexander and S. Bonhoeffer. Pre-existence and emergence of drug resistance in a  
585 generalized model of intra-host viral dynamics. *Epidemics*, 4(4):187–202, 2012.
- 586 [2] H. K. Alexander et al. Evolutionary rescue: linking theory for conservation and medicine.  
587 *Evol. Appl.*, 7(10):1161–1179, 2014.
- 588 [3] L. J. S. Allen. *An introduction to stochastic processes with applications to biology*. CRC press,  
589 2010.
- 590 [4] H. Andersson and T. Britton. *Stochastic Epidemic Models and their Statistical Analysis*,  
591 volume 151 of *Lecture notes in statistics*. Springer, New York, 2000.
- 592 [5] H Andersson and B. Djehiche. A threshold limit theorem for the stochastic logistic epidemic.  
593 *J. Appl. Prob.*, 35:662–670, 1998.
- 594 [6] M. S. Bartlett. Deterministic and stochastic models for recurrent epidemics. In *Proceedings*  
595 *of the Third Berkeley Symposium on Mathematical Statistics and Probability*, volume 4, pages  
596 81–108, 1956.
- 597 [7] G. Bell. Evolutionary rescue. *Annu. Rev. Ecol. Evol. Syst.*, 48:605–627, 2017.

- 598 [8] F. P. Bianchi, S. Mascipinto, P. Stefanizzi, S. De Nitto, C. Germinario, and S. Tafuri. Long-  
599 term immunogenicity after measles vaccine vs. wild infection: an Italian retrospective cohort  
600 study. *Hum. Vaccin. Immunother.*, 17(7):2078–2084, Jul 2021.
- 601 [9] Y. Cai and S. A. H. Geritz. Resident-invader dynamics of similar strategies in fluctuating  
602 environments. *J. Math. Biol.*, 81(4):907–959, 2020.
- 603 [10] P. Carmona and S. Gandon. Winter is coming: Pathogen emergence in seasonal environments.  
604 *PLoS Comput. Biol.*, 16(7):e1007954, 2020.
- 605 [11] H. Chabas, S. Lion, A. Nicot, S. Meaden, S. van Houte, S. Moineau, L. M. Wahl, E. R.  
606 Westra, and S. Gandon. Evolutionary emergence of infectious diseases in heterogeneous host  
607 populations. *PLoS Biol.*, 16(9):e2006738, 2018.
- 608 [12] Y.-Q. Chen et al. Influenza infection in humans induces broadly cross-reactive and protective  
609 neuraminidase-reactive antibodies. *Cell*, 173(2):417–429, 2018.
- 610 [13] S. Cobey, D. B. Larremore, Y. H. Grad, and M. Lipsitch. Concerns about SARS-CoV-2  
611 evolution should not hold back efforts to expand vaccination. *Nat. Rev. Immunol.*, pages 1–6,  
612 2021.
- 613 [14] D. R. Cox and V. Isham. *Point processes*, volume 12. CRC Press, 1980.
- 614 [15] N. G. Davies et al. Estimated transmissibility and impact of SARS-CoV-2 lineage B.1.1.7 in  
615 England. *Science*, 372(6538), 2021.
- 616 [16] T. Day, D. A. Kennedy, A. F. Read, and S. Gandon. Pathogen evolution during vaccination  
617 campaigns. *PLoS Biol.*, 20(9):e3001804, 2022.
- 618 [17] T. Day and A. F. Read. Does high-dose antimicrobial chemotherapy prevent the evolution of  
619 resistance? *PLoS Comput. Biol.*, 12(1):e1004689, 2016.
- 620 [18] S. N. Ethier and T. G. Kurtz. *Markov Processes: Characterization and Convergence*. Wiley  
621 Interscience, Hoboken, 2005.

- 622 [19] S. Gandon and T. Day. The evolutionary epidemiology of vaccination. *J. R. Soc. Interface*,  
623 4(16):803–817, 2007.
- 624 [20] S. Gandon and T. Day. Evidences of parasite evolution after vaccination. *Vaccine*, 26:C4–C7,  
625 2008.
- 626 [21] S. Gandon and S. Lion. Targeted vaccination and the speed of SARS-CoV-2 adaptation. *Proc.*  
627 *Natl. Acad. Sci. U.S.A.*, 119(3):e2110666119, 2022.
- 628 [22] S. Gandon, M. Mackinnon, S. Nee, and A. Read. Imperfect vaccination: some epidemiological  
629 and evolutionary consequences. *Proc. R. Soc., B*, 270(1520):1129–1136, 2003.
- 630 [23] S. A. H. Geritz. Resident-invader dynamics and the coexistence of similar strategies. *J. Math.*  
631 *Biol.*, 50(1):67–82, 2005.
- 632 [24] P. J. Gerrish et al. How unequal vaccine distribution promotes the evolution of vaccine escape.  
633 *Available at SSRN 3827009*, 2021.
- 634 [25] D. T. Gillespie. Exact stochastic simulation of coupled chemical reactions. *J. Phys. Chem.*,  
635 81(25):2340–2361, 1977.
- 636 [26] A. J. Greaney et al. Antibodies elicited by mRNA-1273 vaccination bind more broadly to  
637 the receptor binding domain than do those from SARS-CoV-2 infection. *Sci. Transl. Med.*,  
638 13(600):eabi9915, 2021.
- 639 [27] B. T. Grenfell et al. Unifying the epidemiological and evolutionary dynamics of pathogens.  
640 *Science*, 303(5656):327–332, 2004.
- 641 [28] K. P. Hadeler and P. Van den Driessche. Backward bifurcation in epidemic control. *Math.*  
642 *Biosci.*, 146(1):15–35, 1997.
- 643 [29] K. Hamza, P. Jagers, and F. C. Klebaner. On the establishment, persistence, and inevitable  
644 extinction of populations. *J. Math. Biol.*, 72(4):797–820, 2016.
- 645 [30] M. Hartfield and S. Alizon. Within-host stochastic emergence dynamics of immune-escape  
646 mutants. *PLoS Comput. Biol.*, 11(3):e1004149, 2015.

- 647 [31] H. W. Hethcote. Three basic epidemiological models. In S. A. Levin, T. G. Hallam, and L. J.  
648 Gross, editors, *Applied Mathematical Ecology*, pages 119–144. Springer, 1989.
- 649 [32] J. Humplik, A. L. Hill, and M. A. Nowak. Evolutionary dynamics of infectious diseases in  
650 finite populations. *J. Theor. Biol.*, 360:149–162, 2014.
- 651 [33] P. Jagers. Stabilities and instabilities in population dynamics. *J. Appl. Prob.*, pages 770–780,  
652 1992.
- 653 [34] D. G. Kendall. On the generalized “Birth-and-Death” process. *Ann. Math. Stat.*, 19(1):1–15,  
654 1948.
- 655 [35] D. A. Kennedy and A. F. Read. Why does drug resistance readily evolve but vaccine resistance  
656 does not? *Proc. R. Soc., B*, 284(1851):20162562, 2017.
- 657 [36] D. A. Kennedy and A. F. Read. Why the evolution of vaccine resistance is less of a concern  
658 than the evolution of drug resistance. *Proc. Natl. Acad. Sci. U.S.A.*, 115(51):12878–12886,  
659 2018.
- 660 [37] W. O. Kermack and A. G. McKendrick. A contribution to the mathematical theory of epi-  
661 demics. *Proc. R. Soc. A*, 115(772):700–721, 1927.
- 662 [38] J. H. Kim et al. Prior infection with influenza virus but not vaccination leaves a long-term  
663 immunological imprint that intensifies the protective efficacy of antigenically drifted vaccine  
664 strains. *Vaccine*, 34(4):495–502, 2016.
- 665 [39] O. Kogan, M. Khasin, B. Meerson, D. Schneider, and C. R. Myers. Two-strain competition in  
666 quasinneutral stochastic disease dynamics. *Phy. Rev. E*, 90(4):042149, 2014.
- 667 [40] R. D. Kouyos et al. The path of least resistance: aggressive or moderate treatment? *Proc. R.*  
668 *Soc. B*, 281(1794):20140566, 2014.
- 669 [41] C. M. Kribs-Zaleta and J. X. Velasco-Hernández. A simple vaccination model with multiple  
670 endemic states. *Math. Biosci.*, 164(2):183–201, 2000.



- 671 [42] G. Lobinska et al. Evolution of resistance to COVID-19 vaccination with dynamic social  
672 distancing. *Nat. Hum. Behav.*, 6(2):193–206, 2022.
- 673 [43] G. Martin et al. The probability of evolutionary rescue: towards a quantitative compari-  
674 son between theory and evolution experiments. *Philos. Trans. R. Soc. Lond., B, Biol. Sci.*,  
675 368(1610):20120088, 2013.
- 676 [44] H. McCallum, N. Barlow, and J. Hone. How should pathogen transmission be modelled?  
677 *Trends Ecol. Evol.*, 16(6):295–300, 2001.
- 678 [45] A. R. McLean. After the honeymoon in measles control. *Lancet*, 345(8945):272, 1995.
- 679 [46] D. V. McLeod, L. M. Wahl, and N. Mideo. Mosaic vaccination: how distributing different  
680 vaccines across a population could improve epidemic control. *bioRxiv*, pages 2020–11, 2021.
- 681 [47] T. L. Parsons. Invasion probabilities, hitting times, and some fluctuation theory for the stochas-  
682 tic logistic process. *J. Math. Biol.*, 77(4):1193–1231, 2018.
- 683 [48] T. L. Parsons, B. M. Bolker, J. Dushoff, and David J. D. Earn. The probability of epi-  
684 demic burnout in the stochastic SIR model with vital dynamics. *Proc. Natl. Acad. Sci. USA*,  
685 121(5):e2313708120, 2024.
- 686 [49] T. L. Parsons, A. Lambert, T. Day, and S. Gandon. Pathogen evolution in finite populations:  
687 slow and steady spreads the best. *J. R. Soc. Interface*, 15(147), 2018.
- 688 [50] R. S. Paton, C. E. Overton, and T. Ward. The rapid replacement of the Delta variant by  
689 Omicron (B.1.1.529) in England. *Sci. Transl. Med.*, page eabo5395, 2022.
- 690 [51] T. Priklopil and L. Lehmann. Invasion implies substitution in ecological communities with  
691 class-structured populations. *Theor. Popul. Biol.*, 134:36–52, 2020.
- 692 [52] J. W. Rausch, A. A. Capoferri, M. G. Katusiime, S. C. Patro, and M. F. Kearney. Low  
693 genetic diversity may be an Achilles heel of SARS-CoV-2. *Proc. Natl. Acad. Sci. U.S.A.*,  
694 117(40):24614–24616, 2020.

- 695 [53] A. F. Read, T. Day, and S. Huijben. The evolution of drug resistance and the curious orthodoxy  
696 of aggressive chemotherapy. *Proc. Natl. Acad. Sci. U.S.A.*, 108(Supplement 2):10871–10877,  
697 2011.
- 698 [54] S. A. Rella, Y. A. Kulikova, E. T. Dermitzakis, and F. A. Kondrashov. Rates of SARS-CoV-2  
699 transmission and vaccination impact the fate of vaccine-resistant strains. *Sci. Rep.*, 11(1):1–10,  
700 2021.
- 701 [55] O. Restif and B. T. Grenfell. Vaccination and the dynamics of immune evasion. *J. R. Soc.*  
702 *Interface*, 4(12):143–153, 2007.
- 703 [56] C. M. Saad-Roy et al. Epidemiological and evolutionary considerations of SARS-CoV-2 vaccine  
704 dosing regimes. *Science*, 372(6540):363–370, 2021.
- 705 [57] R. Sanjuán et al. Viral mutation rates. *J. Virol.*, 84(19):9733–9748, 2010.
- 706 [58] R. N. Thompson, E. M. Hill, and J. R. Gog. SARS-CoV-2 incidence and vaccine escape. *Lancet*  
707 *Infect. Dis.*, 2021.
- 708 [59] O. A. Van Herwaarden and J. Grasman. Stochastic epidemics: major outbreaks and the  
709 duration of the endemic period. *J. Math. Biol.*, 33(6):581–601, 1995.
- 710 [60] S. van Houte et al. The diversity-generating benefits of a prokaryotic adaptive immune system.  
711 *Nature*, 532(7599):385–388, 2016.
- 712 [61] C. Viboud et al. Beyond clinical trials: Evolutionary and epidemiological considerations for  
713 development of a universal influenza vaccine. *PLoS Pathog.*, 16(9):e1008583, 2020.
- 714 [62] E. Volz et al. Assessing transmissibility of SARS-CoV-2 lineage B.1.1.7 in England. *Nature*,  
715 593(7858):266–269, 2021.
- 716 [63] P. Wang et al. Antibody resistance of SARS-CoV-2 variants B.1.351 and B.1.1.7. *Nature*,  
717 593(7857):130–135, 2021.

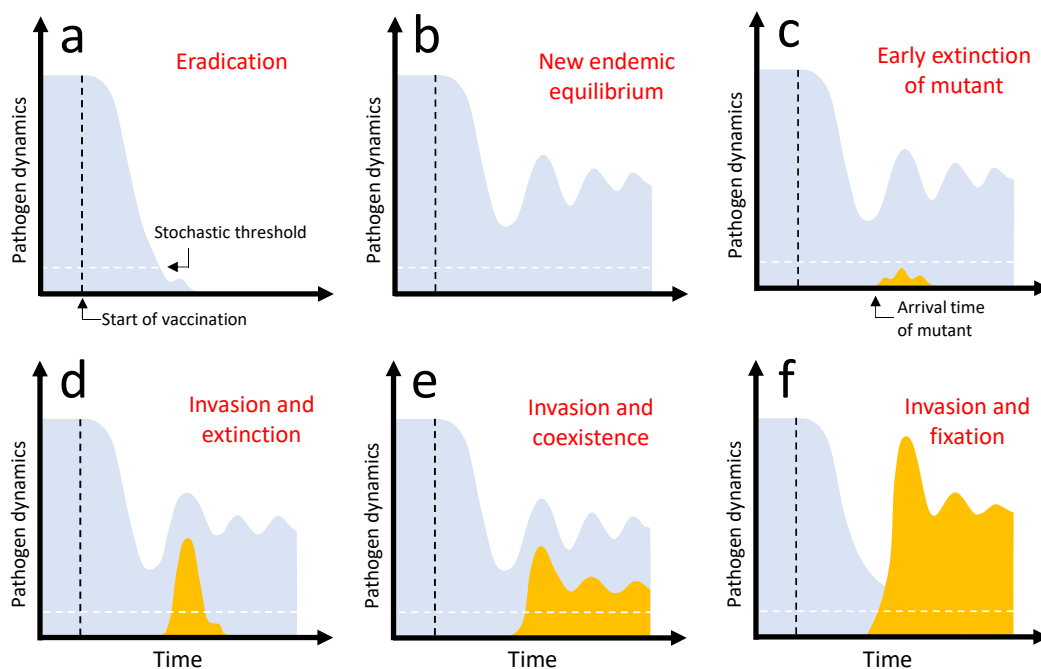

**Figure 1: Graphical representation of the different evolutionary epidemiology outcomes after vaccination.** The density of the wild-type pathogen is indicated in light blue and the dynamics of the mutant in orange. Each panel describes the temporal dynamics of the epidemics after the start of vaccination: (a) eradication of the wild-type pathogen, (b) new endemic equilibrium of the wild-type population after damped oscillations (with no introduction of the vaccine-escape mutant), (c) early extinction of the vaccine-escape mutant after its introduction by mutation, (d) invasion of the vaccine-escape mutant followed by its extinction, (e) invasion of the vaccine-escape mutant and long-term coexistence with the wild-type in a new endemic equilibrium after damped oscillations, (f) invasion and fixation of the vaccine-escape mutant (extinction of the wild-type). The vertical dashed line (black) indicates the start of vaccination. For simplicity we consider that vaccination starts after the wild-type population has reached an endemic equilibrium. The horizontal dashed line indicates the “stochastic threshold” above which one may consider that the deterministic model provides a very good approximation of the dynamics and we can neglect the effect of demographic stochasticity. *Invasion* occurs when the vaccine-escape variant manages to go beyond the “stochastic threshold” (panels d, e and f). *Adaptation* occurs when the vaccine-escape variant is maintained in the population (panels e and f). *Fixation* occurs when the vaccine-escape variant manages to outcompete the wild-type (panel f).

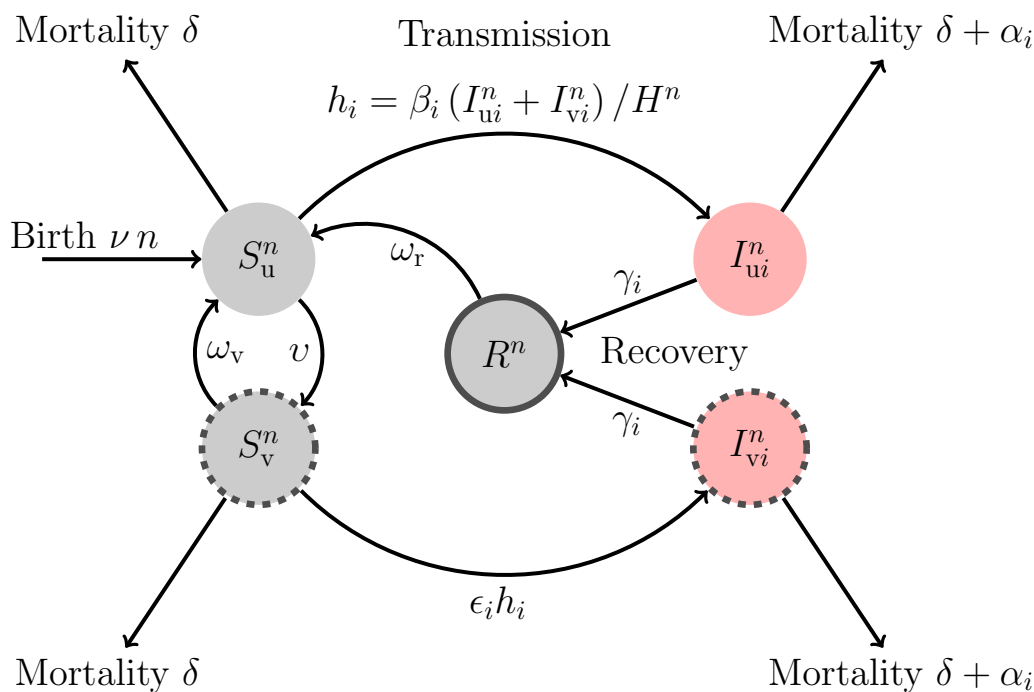

**Figure 2: A schematic representation of the model.** Naïve and uninfected hosts ( $S_u^n$  hosts) are introduced at a rate  $\nu$  and are vaccinated at rate  $v$ . Immunization induced by the vaccine wanes at rate  $\omega_v$ . Uninfected hosts ( $S_u^n$  and  $S_v^n$ ) die at a rate  $\delta$  while infected hosts ( $I_u^n$  and  $I_v^n$ ) die at a rate  $d_i = \delta + \alpha_i$ , where  $i$  refers to the virus genotype: the wild-type ( $i = w$ ) or the vaccine-escape mutant ( $i = m$ ). The rate of infection of naïve hosts by the genotype  $i$  is  $h_i = \beta_i (I_u^n + I_v^n) / H^n$ , where  $\beta_i$  is the transmission rate of the genotype  $i$ . Vaccination reduces the force of infection and  $\epsilon_i$  refers to the ability of the genotype  $i$  to escape the immunity triggered by vaccination (we assume  $\epsilon_m > \epsilon_w$ ). A host infected by pathogen genotype  $i$  recovers from the infection at rate  $\gamma_i$  and yields naturally immune hosts ( $R^n$  hosts) that cannot be reinfected by both the wild-type and the escape mutant. Natural immunity is assumed to wane at rate  $\omega_r$ . The total host population density is  $H^n = S_u^n + S_v^n + \sum_{i \in \{w,m\}} (I_u^n + I_v^n) + R^n$ .

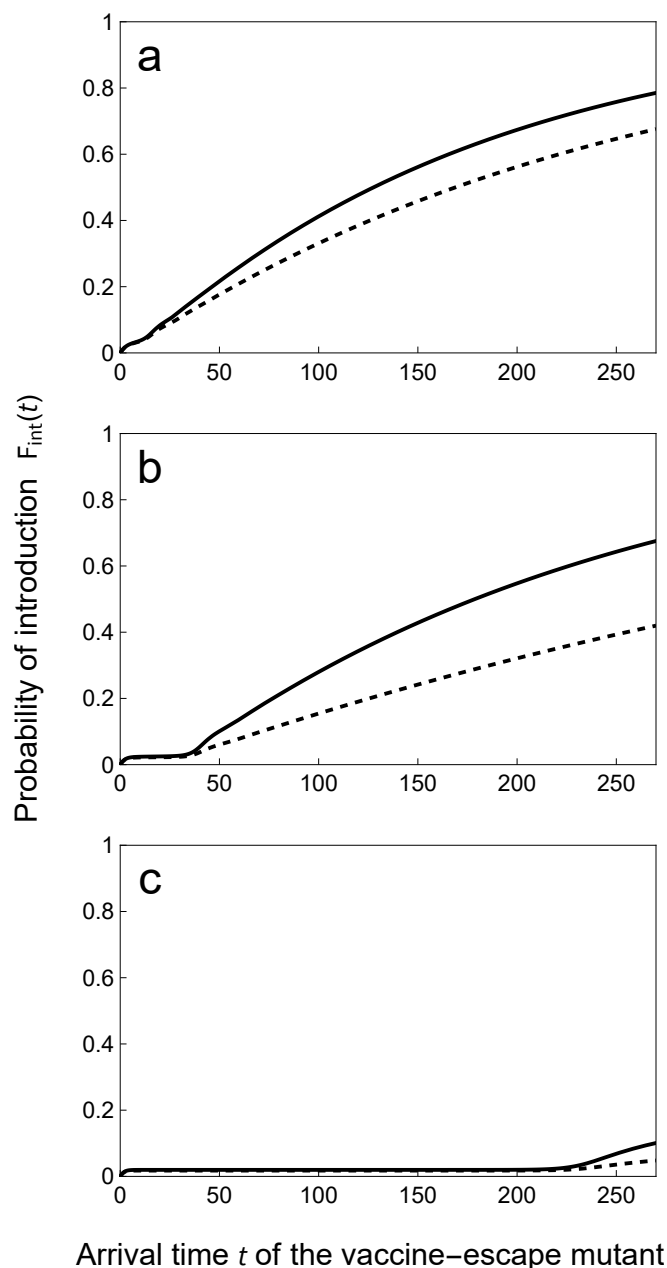

**Figure 3: Faster vaccine rollout delays the arrival time of the first escape mutant.** We plot the probability,  $F_{\text{int}}(t)$ , that the first escape mutant arrives prior to time  $t$  for different speeds of vaccination rollout:  $v = 0.05$  (top),  $0.15$  (middle) and  $0.24$  (bottom). We contrast a scenario where  $\theta_v = \theta_u$  (dashed line), and  $\theta_v = 10 \times \theta_u$  (full line). Other parameter values:  $\theta_u = 1$ ,  $\nu = \delta = 3 \cdot 10^{-4}$ ,  $\omega_v = \omega_r = 0.05$ ,  $\alpha_w = 0.02$ ,  $\beta_w = 10$ ,  $\gamma_w = 2$ ,  $\epsilon_w = 0.05$ ,  $\mathcal{R}_w = 4.95$ . For these parameter values the critical rate of vaccination  $v_c$  above which the wild-type pathogen is driven to extinction is  $v_c \approx 0.264$  (see equation (8)).

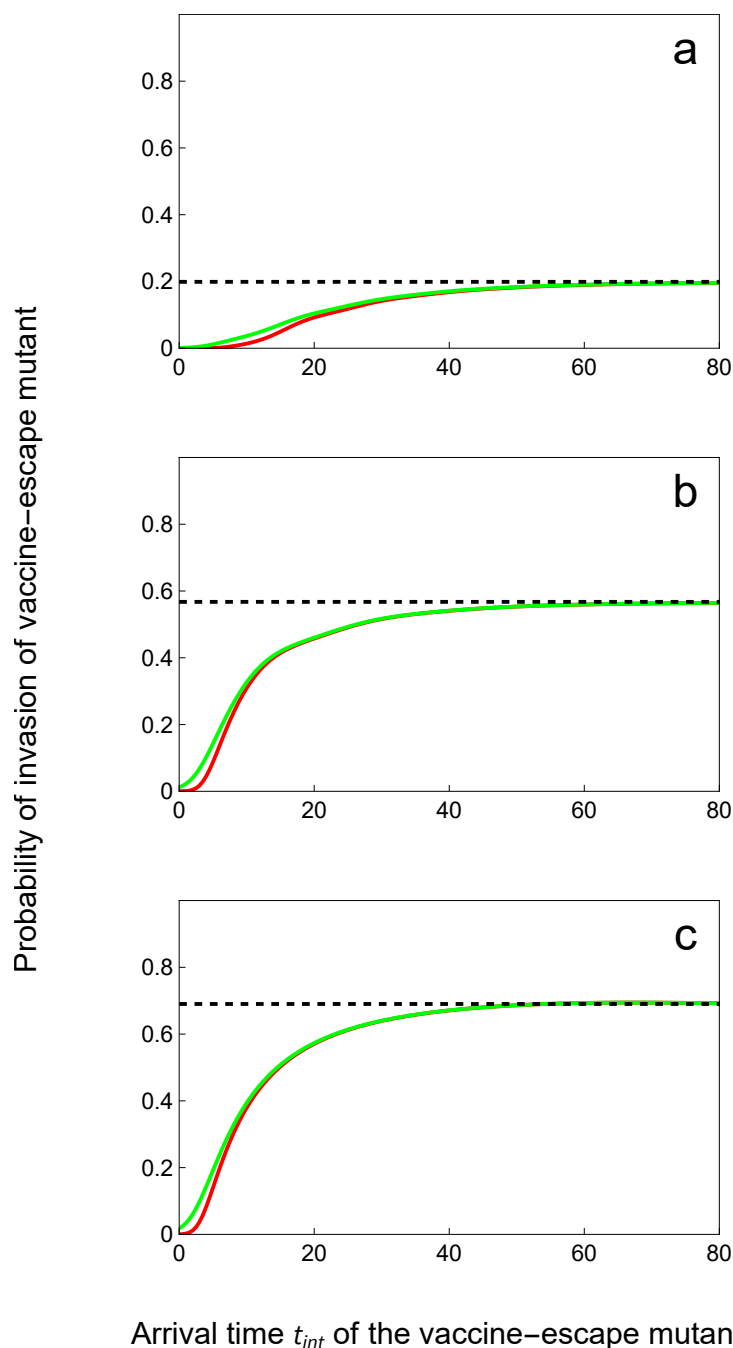

**Figure 4: Probability of invasion of the vaccine-escape mutant increases with  $T_{\text{int}}$ .** We plot the probability invasion  $P_{\text{inv}}(t_{\text{int}})$  of a *slow* (green) and a *fast* (red) vaccine-escape mutant for different speeds of vaccination rollout:  $v = 0.05$  (top),  $0.15$  (middle) and  $0.24$  (bottom). The *slow* mutant:  $\alpha_m = 0.02, \beta_m = 7, \gamma_m = 2, \epsilon_m = 1, \mathcal{R}_m = 3.46$ . The *fast* mutant:  $\alpha_m = 4.0606, \beta_m = 21, \gamma_m = 2, \epsilon_m = 1, \mathcal{R}_m = 3.46$ . The probability of invasion  $P_{\text{inv}}^*$  in the limit  $t_{\text{int}} \rightarrow \infty$  (see equation (16)) is indicated with the dashed black line. Other parameter values as in **Figure 3**:  $\nu = \delta = 3 \cdot 10^{-4}, \omega_v = \omega_r = 0.05, \alpha_w = 0.02, \beta_w = 10, \gamma_w = 2, \epsilon_w = 0.05, \mathcal{R}_w = 4.95$ .

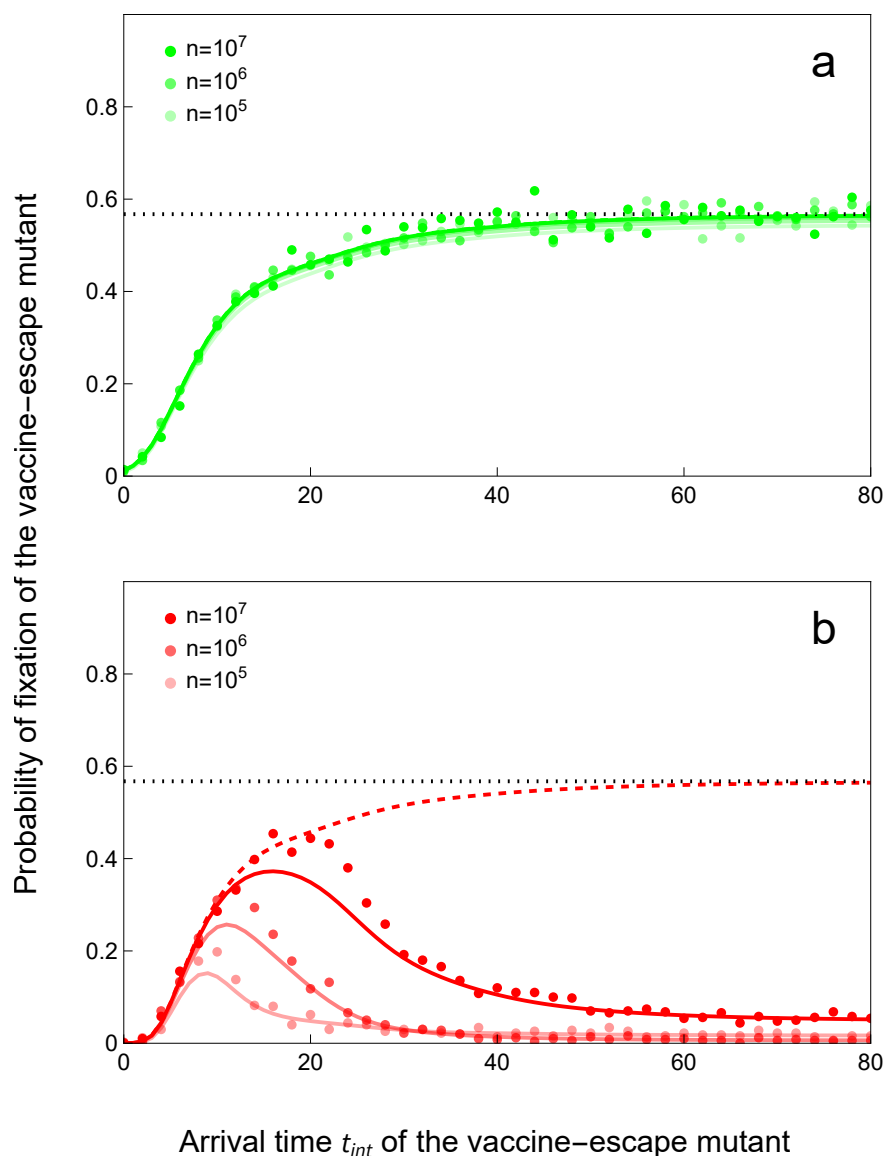

**Figure 5: Probability of fixation of the vaccine-escape mutant may be low when  $T_{\text{int}}$  is large.** We plot the probability of fixation of (A) a *slow* (green) and (B) a *fast* (red) vaccine-escape mutant for an intermediate speed of vaccination rollout:  $v = 0.15$ . The *slow* mutant:  $\alpha_m = 0.02, \beta_m = 7, \gamma_m = 2, \epsilon_m = 1, \mathcal{R}_m = 3.46$ . The *fast* mutant:  $\alpha_m = 4.0606, \beta_m = 21, \gamma_m = 2, \epsilon_m = 1, \mathcal{R}_m = 3.46$ . The full colored lines give the probability of fixation  $P_{\text{fix}}(t_{\text{inv}})$  computed numerically (see Methods section 5.4) and the dots give the results of individual-based simulations (see Methods section 5.6) for different values of  $n$  which affect the pathogen population size and the intensity of demographic stochasticity. We plot the probability of *invasion*  $P_{\text{inv}}(t)$  (see **Figure 4**) with dashed colored line and its asymptotic value  $P_{\text{inv}}^*$  with a dotted black line. Other parameter values as in **Figure 3**:  $\nu = \delta = 3 \cdot 10^{-4}$ ,  $\omega_v = \omega_r = 0.05$ ,  $p = 0$ ,  $\alpha_w = 0.02$ ,  $\beta_w = 10$ ,  $\gamma_w = 2$ ,  $\epsilon_w = 0.05$ ,  $\mathcal{R}_w = 4.95$ .

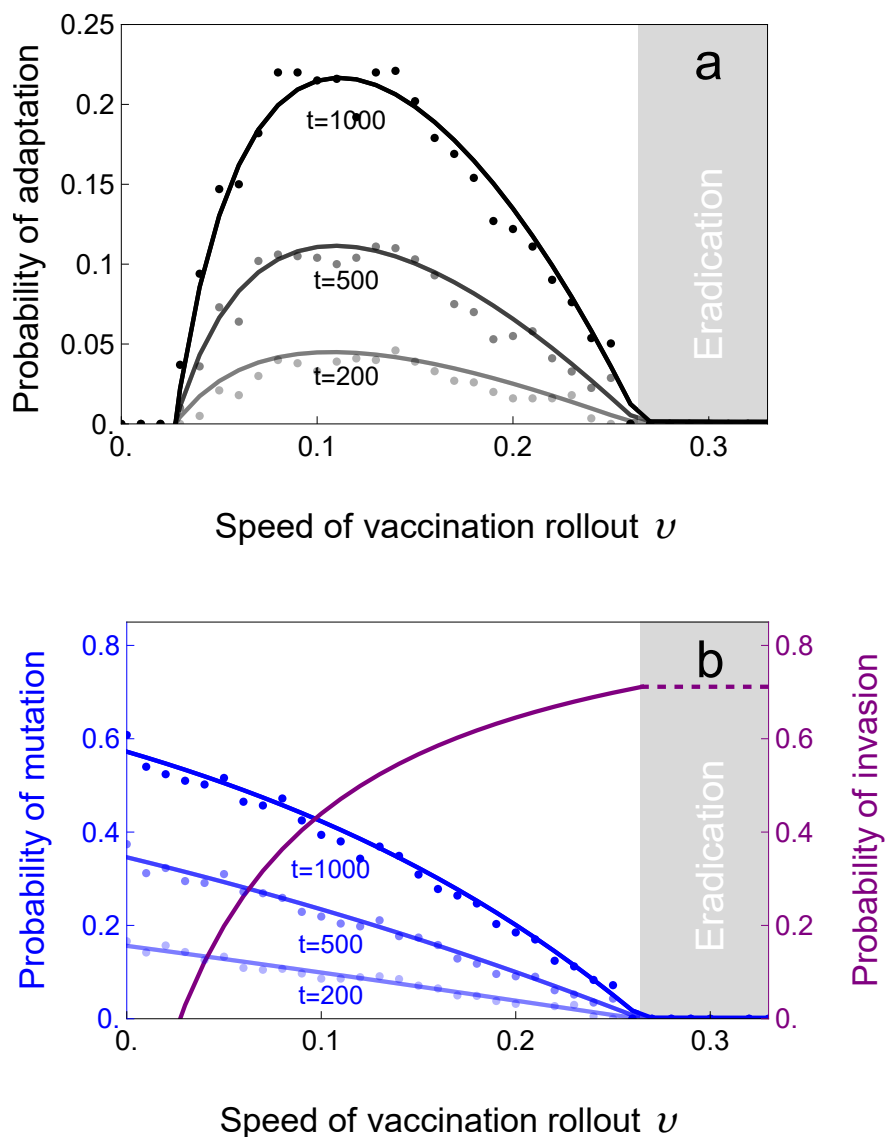

**Figure 6: The probability of adaptation is maximised for intermediate speed of vaccination rollout.** In (A) We plot the probability of adaptation  $F_{inv}(t)$  (black lines) against the speed of vaccination rollout at different points in time. In (B) we plot the probability  $F_{int}(t)$  of the introduction of at least one mutant before different points in time  $t$  (blue lines) and the probability  $P_{inv}^*$  (purple line) which gives a good approximation of the probability of successful invasion of an escape-mutant. The dashed purple line gives the probability of invasion of the escape-mutant in the absence of the wild-type. The dots give the results of individual-based simulations (see Methods section 5.6). The vaccine-escape mutant is assumed to have the following phenotype (*slow* mutant in **Figure 4** and **5**):  $\alpha_m = 0.02, \beta_m = 7, \gamma_m = 2, \epsilon_m = 1, \mathcal{R}_m = 3.46$ . Other parameter values:  $\nu = \delta = 3 \cdot 10^{-4}, n = 10^6, \omega_v = \omega_r = 0.05, \alpha_w = 0.02, \beta_w = 10, \gamma_w = 2, \epsilon_w = 0.05, \mathcal{R}_w = 4.95$ . The light gray area on the right-hand-side indicates the speed above which the wild-type pathogen is expected to be driven to extinction ( $\nu > \nu_c \approx 0.264$ , see equation (8)).



**Table 1:** We model the epidemic via a Continuous Time Markov Chain (CTMC) with *discrete* states  $(S_u^n, S_v^n, I_{uw}^n, I_{um}^n, I_{vw}^n, I_{vm}^n, R^n)$ . Jumps  $(\Delta S_u^n, \Delta S_v^n, \Delta I_{uw}^n, \Delta I_{um}^n, \Delta I_{vw}^n, \Delta I_{vm}^n, \Delta R^n)$  occur at state dependent rates (*i.e.*, with probability proportional to  $\Delta t$  in a short interval  $[t, t + \Delta t)$ ). We implement this Markov chain using the Gillespie algorithm [25] to obtain the simulated fixation probabilities in **Figure 5** and **6**.

| Event            | Jump                                                                                                           | Rate                                                     |
|------------------|----------------------------------------------------------------------------------------------------------------|----------------------------------------------------------|
|                  | $(\Delta S_u^n, \Delta S_v^n, \Delta I_{uw}^n, \Delta I_{um}^n, \Delta I_{vw}^n, \Delta I_{vm}^n, \Delta R^n)$ |                                                          |
| Birth            | $(1, 0, 0, 0, 0, 0, 0)$                                                                                        | $n\nu$                                                   |
| Vaccination      | $(-1, 1, 0, 0, 0, 0, 0)$                                                                                       | $\nu S_u^n$                                              |
| Loss of immunity | $(1, -1, 0, 0, 0, 0, 0)$                                                                                       | $\omega_v S_v^n$                                         |
|                  | $(1, 0, 0, 0, 0, 0, -1)$                                                                                       | $\omega_r R^n$                                           |
| Infection        | $(-1, 0, 1, 0, 0, 0, 0)$                                                                                       | $\beta_w \frac{I_{uw}^n + I_{vw}^n}{H} S_u^n$            |
|                  | $(-1, 0, 0, 1, 0, 0, 0)$                                                                                       | $\beta_m \frac{I_{um}^n + I_{vm}^n}{H} S_u^n$            |
|                  | $(0, -1, 0, 0, 1, 0, 0)$                                                                                       | $\epsilon_w \beta_w \frac{I_{uw}^n + I_{vw}^n}{H} S_v^n$ |
|                  | $(0, -1, 0, 0, 0, 1, 0)$                                                                                       | $\epsilon_m \beta_m \frac{I_{um}^n + I_{vm}^n}{H} S_v^n$ |
| Recovery         | $(0, 0, -1, 0, 0, 0, 1)$                                                                                       | $\gamma_w I_{uw}^n$                                      |
|                  | $(0, 0, 0, -1, 0, 0, 1)$                                                                                       | $\gamma_m I_{um}^n$                                      |
|                  | $(0, 0, 0, 0, -1, 0, 1)$                                                                                       | $\gamma_w I_{vw}^n$                                      |
|                  | $(0, 0, 0, 0, 0, -1, 1)$                                                                                       | $\gamma_m I_{vm}^n$                                      |
| Death            | $(-1, 0, 0, 0, 0, 0, 0)$                                                                                       | $\delta S_u^n$                                           |
|                  | $(0, -1, 0, 0, 0, 0, 0)$                                                                                       | $\delta S_v^n$                                           |
|                  | $(0, 0, -1, 0, 0, 0, 0)$                                                                                       | $(\delta + \alpha_w) I_{uw}^n$                           |
|                  | $(0, 0, 0, -1, 0, 0, 0)$                                                                                       | $(\delta + \alpha_m) I_{um}^n$                           |
|                  | $(0, 0, 0, 0, -1, 0, 0)$                                                                                       | $(\delta + \alpha_w) I_{vw}^n$                           |
|                  | $(0, 0, 0, 0, 0, -1, 0)$                                                                                       | $(\delta + \alpha_m) I_{vm}^n$                           |
|                  | $(0, 0, 0, 0, 0, 0, -1)$                                                                                       | $\delta R^n$                                             |
